# Supplementary material
Source: PubMed Central journal article supplement (PMC3457659)

# Thiourea-catalysed ring opening of episulfonium ions with indole derivatives by means of stabilising, non-covalent interactions

Song Lin and Eric N. Jacobsen\*

*Department of Chemistry and Chemical Biology, Harvard University, Cambridge, Massachusetts 02138*

Email: jacobsen@chemistry.harvard.edu

## Contents

|                                                                                                                                                   |                    |
|---------------------------------------------------------------------------------------------------------------------------------------------------|--------------------|
| 1. General information.....                                                                                                                       | <a href="#">2</a>  |
| 2. Preparation and characterization of thiourea catalysts <b>3e</b> , <b>3g</b> and <b>4e</b> .....                                               | <a href="#">2</a>  |
| 3. General procedures for thiourea-catalysed nucleophilic ring opening of episulfonium ions.....                                                  | <a href="#">5</a>  |
| 4. Catalyst structure investigations.....                                                                                                         | <a href="#">6</a>  |
| 5. Preparation and characterisation of substrates <b>1a-1z</b> .....                                                                              | <a href="#">7</a>  |
| 6. Data for kinetic analysis with in situ IR spectroscopy and derivation of the empirical rate laws.....                                          | <a href="#">13</a> |
| 7. Non-linear effect study.....                                                                                                                   | <a href="#">18</a> |
| 8. Data for linear free energy relationship study with Mayr's reactivity parameters.....                                                          | <a href="#">19</a> |
| 9. Data for kinetic isotope effect study.....                                                                                                     | <a href="#">21</a> |
| 10. Data sets for Eyring analysis.....                                                                                                            | <a href="#">25</a> |
| 11. Data for kinetic analysis of reactions catalysed by thiourea <b>3a-3g</b> .....                                                               | <a href="#">26</a> |
| 12. Correlations of arene properties with reaction rate and enantioselectivity data.....                                                          | <a href="#">26</a> |
| 13. NMR binding study of thiourea <b>3e/3a</b> with dibenzylmethylsulfonium triflate <b>5</b> .....                                               | <a href="#">28</a> |
| 14. Correlation of indole N-H acidity with the reaction rate, and structure-reactivity, and -selectivity relationship of $\pi$ -nucleophiles..... | <a href="#">30</a> |
| 15. Crystallographic data of compounds <b>2b</b> , <b>2g</b> and <b>2q</b> .....                                                                  | <a href="#">32</a> |
| 16. Characterization of products <b>2a-2z</b> .....                                                                                               | <a href="#">35</a> |

## 1. General information

All reactions were performed in oven-dried 1.5-dram vials unless otherwise noted. The vials were fitted with rubber septa and reactions were conducted under air. Stainless steel syringes were used to transfer air- and moisture-sensitive liquids. Flash chromatography was performed using silica gel 60 (230-400 mesh) from EM Science. Commercial reagents were purchased from Sigma Aldrich, Alfa Aesar, Strem, Lancaster or TCI, and used as received with the following exceptions: toluene, dichloromethane, tetrahydrofuran, diethyl ether, *t*-butyl methyl ether and methanol were dried by passing through columns of activated alumina; dimethylformamide was dried by passing through columns of activated molecular sieves. Triethylamine were distilled from CaH<sub>2</sub> at 760 torr. *s*-Butyllithium was titrated using diphenylacetic acid as an indicator. Proton nuclear magnetic resonance (<sup>1</sup>H NMR) spectra and carbon nuclear magnetic resonance (<sup>13</sup>C NMR) spectra were recorded on Inova-500 (500 MHz) and Inova-600 (600 MHz) spectrometers. Chemical shifts for protons are reported in parts per million downfield from tetramethylsilane and are referenced to residual protium in the NMR solvent (CHCl<sub>3</sub> = δ 7.27, toluene -CH<sub>3</sub> = δ 2.09). Chemical shifts for carbon are reported in parts per million downfield from tetramethylsilane and are referenced to the carbon resonances of the solvent (CDCl<sub>3</sub> = δ 77.0). Data are represented as follows: chemical shift, multiplicity (br. s = broad, s = singlet, d = doublet, t = triplet, q = quartet, m = multiplet), coupling constants in Hertz (Hz), integration. Infrared (IR) spectra were obtained using a Bruker Optics Tensor 27 FTIR spectrometer. Optical rotations were measured using a 1 mL cell with a 0.5 dm path length on a Jasco DIP 370 digital polarimeter. The mass spectral data were obtained on an Agilent Technologies 6120 quadrupole LC/MS spectrometer. Chiral HPLC analysis was performed using a Shimadzu VP series instrument or an Agilent Technologies 1200 series instrument with commercial Chiralpak columns.

Abbreviations: Boc – *tert*-butyl carbamate, *s*-BuLi – *sec*-butyllithium, DCM – dichloromethane, EDC – 1-(3-(dimethyl-amino)propyl)-3-ethyl-carbodiimide hydrochloride, EtOAc – ethyl acetate, HOBT – 1-hydroxybenzotriazole, MeOH – methanol, MTBE – *tert*-butylmethyl ether, NBSA – nitrobenzenesulfonic acid, NEt<sub>3</sub> – triethylamine, *i*-PrOH – isopropyl alcohol, THF – tetrahydrofuran.

## 2. Preparation and characterization of thiourea catalysts 3e, 3g and 4e

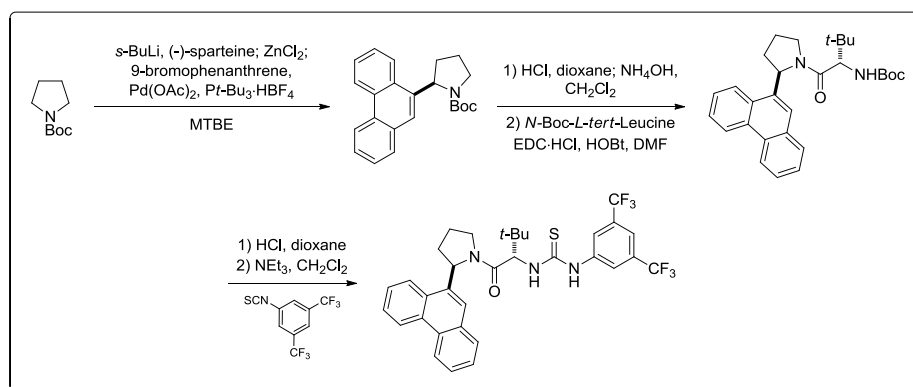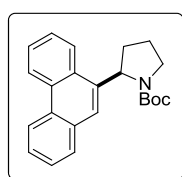

***N*-Boc-(*R*)-2-(9-phenanthryl)pyrrolidine** According to the procedure of Campos, *N*-Boc-pyrrolidine (0.75 mL, 4.3 mmol) and (-)-sparteine (0.98 mL, 4.3 mmol) were dissolved in MTBE (10 mL) and the resulting solution was cooled to -78 °C.<sup>1</sup> To this solution *s*-BuLi (1.4 M in cyclohexane, 3.1 mL, 4.3 mmol) was added dropwise via syringe pump over 40 min and the resulting solution was stirred for 3

h at  $-78\text{ }^{\circ}\text{C}$ . A solution of  $\text{ZnCl}_2$  (1 M in  $\text{Et}_2\text{O}$ , 4.3 mL, 4.3 mmol) was then added via syringe pump over 30 min with rapid stirring. The resulting suspension was aged at  $-78\text{ }^{\circ}\text{C}$  for 30 min, and then warmed to room temperature. After 30 min, 9-bromophenanthrene (1.00 g, 3.9 mmol) was added, followed by  $\text{Pd}(\text{OAc})_2$  (47.0 mg, 0.21 mmol) and  $\text{Pr-Bu}_3\text{HBF}_4$  (69.6 mg, 0.24 mmol) in one portion. The reaction was stirred for 28 hours at room temperature. To facilitate the filtration,  $\sim 0.3\text{ mL}$   $\text{NH}_4\text{OH}$  was added, and the mixture was stirred for 1 h. The resulting slurry was filtered over Celite and rinsed with MTBE. The filtrate was washed with 1 M HCl and then twice with water. The organic layer was dried over  $\text{Na}_2\text{SO}_4$ , filtered and concentrated. The crude product was purified on the silica gel flash chromatography to obtain the desired coupling product as a pale yellow solid (0.70 g, 52%). IR (Film) 2974, 1689 (s), 1390 (s), 1248, 1162 (s), 1121, 907, 725 (s)  $\text{cm}^{-1}$ ;  $^1\text{H}$  NMR (500 MHz,  $\text{CDCl}_3$ , exists as rotamers, resonances of the minor rotamer are shown with \*)  $\delta = 8.80 - 8.74$  (m, 1H), 8.69 (d,  $J=7.8$  Hz, 1H), 8.08 (d,  $J=7.3$  Hz, 1H), 7.87 (d,  $J=7.8$  Hz, 1H), 7.72 - 7.59 (m, 4H), 7.52 - 7.47 (m, 1H), 5.81\* (d,  $J=7.8$  Hz, 0.3H), 5.67 (d,  $J=7.8$  Hz, 0.7H), 3.93 - 3.88 (m, 0.7H), 3.85\* (m, 0.3H), 3.75 - 3.71 (m, 0.7H), 2.63 - 2.69\* (m, 0.3H), 2.55 - 2.49 (m, 1H), 2.04 - 1.91 (m, 3H), 1.55\* (s, 3H), 1.17 (s, 6H);  $^{13}\text{C}$  NMR (100 MHz,  $\text{CDCl}_3$ )  $\delta = 154.7, 137.4, 131.4, 130.8, 129.7, 128.4, 126.7, 126.4, 126.2, 126.0, 124.0, 123.6, 123.3, 122.3, 122.2, 79.2, 58.3, 47.3, 46.9, 33.7, 32.8, 28.5, 28.1, 23.4, 22.8$ ; MS (ESI-APCI) exact mass calculated for  $[\text{M}+\text{Na}]$  ( $\text{C}_{23}\text{H}_{25}\text{NNaO}_2$ ) requires  $m/z$  370.2, found  $m/z$  370.1;  $[\alpha]_{\text{D}}^{24} = +141.8$  ( $c = 1.0, \text{CH}_2\text{Cl}_2$ ).

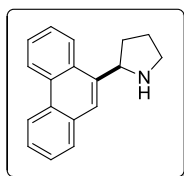

**(R)-2-(phenanthren-9-yl)pyrrolidine.** To *N*-Boc-(*R*)-2-(9-phenanthryl)pyrrolidine (0.70 g, 2.0 mmol) was added HCl (4 M in dioxane, 6 mL). The reaction mixture was stirred at room temperature for 2 h, then diluted with EtOAc (ca. 10 mL), and quenched with a mixture of water (10 mL) and 33% aqueous  $\text{NH}_4\text{OH}$  (5 mL). The resulting biphasic liquid was stirred for 10 min. The aqueous layer was separated and extracted with EtOAc twice. The combined organic layers were then dried over  $\text{Na}_2\text{SO}_4$ , and concentrated under vacuum in a 100 mL round bottom flask to afford (*R*)-2-(9-phenanthryl)pyrrolidine as a pale yellow gel. This crude product was used directly without further purification.

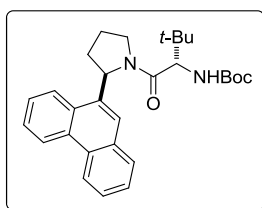

**tert-butyl ((S)-3,3-dimethyl-1-oxo-1-((R)-2-(phenanthren-9-yl)pyrrolidin-1-yl)butan-2-yl)carbamate.** A 100 mL round bottom flask was charged with (*R*)-2-(phenanthren-9-yl)pyrrolidine (494 mg, 2.0 mmol), *N*-Boc-*L*-*tert*-Leucine (508 mg, 2.2 mmol), EDC HCl (420 mg, 2.2 mmol), HOBt (297 mg, 2.2 mmol) and DMF (10 mL). The solution was stirred at room temperature overnight, and quenched with water. The aqueous layer was separated and extracted three times with EtOAc. The combined organic layers were washed with  $\text{NH}_4\text{Cl}$  and brine, dried over  $\text{Na}_2\text{SO}_4$ , and concentrated to obtain the crude product, which was purified by silica gel flash chromatography to give the desired amide product as pale yellow crystals (750 mg, 83% over two steps). IR (Film) 3444, 2971, 1706 (s), 1645 (s), 1495, 1421 (s), 1365, 1245, 1164 (s), 1061, 1004, 906, 748 (s)  $\text{cm}^{-1}$ ;  $^1\text{H}$  NMR (500 MHz,  $\text{CDCl}_3$ , exists as rotamers, resonances of the minor rotamer are shown with \*)  $\delta = 8.86 - 8.54$  (m, 2H), 8.09 (d,  $J=7.8$  Hz, 1H), 7.80 (d,  $J=7.8$  Hz, 1H), 7.94 - 7.49 (m, 4H), 7.33 (s, 1H), 6.43\* (d,  $J=8.3$  Hz, 0.2H), 6.02 (d,  $J=8.3$  Hz, 0.8H), 5.25 (d,  $J=10.3$  Hz, 0.8H), 5.11\* (d,  $J=10.3$  Hz, 0.2H), 4.56 (d,  $J=9.8$  Hz, 1H), 4.39 (m, 1H), 3.95 - 3.77 (m, 1H), 2.41 (m, 1H), 2.20 - 1.95 (m, 3H), 1.68 - 1.52 (m, 9H), 1.21 - 1.05 (m, 9H);  $^{13}\text{C}$  NMR (125 MHz,  $\text{CDCl}_3$ )  $\delta = 170.43, 156.09, 134.90, 131.29, 131.03, 129.89, 129.49, 128.76, 128.44, 126.57, 126.35, 126.27, 126.15, 126.08, 124.62, 124.18, 123.95, 123.22, 122.43, 122.24, 122.12, 79.54, 58.56, 57.94, 48.29$ ,

47.00, 34.78, 34.42, 33.68, 32.17, 28.45, 28.30, 26.41, 23.43, 21.55; MS (ESI-APCI) exact mass calculated for [M+Na] (C<sub>29</sub>H<sub>36</sub>N<sub>2</sub>NaO<sub>3</sub>) requires  $m/z$  483.3, found  $m/z$  483.3;  $[\alpha]_D^{24} = +93.4$  ( $c = 1.0$ , CH<sub>2</sub>Cl<sub>2</sub>).

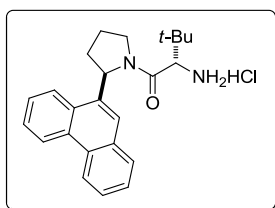

**(S)-3,3-dimethyl-1-oxo-1-((R)-2-(phenanthren-9-yl)pyrrolidin-1-yl)butan-2-yl carbamate hydrochloride.** To a solution of *tert*-butyl

((S)-3,3-dimethyl-1-oxo-1-((R)-2-(phenanthren-9-yl)pyrrolidin-1-yl)butan-2-yl) carbamate (950 mg, 2.1 mmol) at 0 °C was added HCl (4 M in dioxane, 10 mL) slowly. The reaction was warmed to room temperature and stirred until the starting material was consumed, as judged by TLC analysis (ca. 4 h). The reaction mixture was then concentrated under vacuum, yielding a yellow oil that was used directly without further purification.

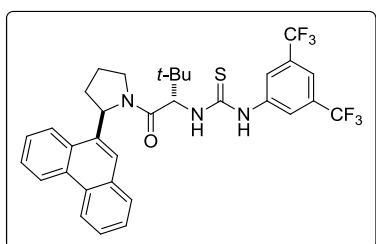

**1-(3,5-bis(trifluoromethyl)phenyl)-3-((S)-3,3-dimethyl-1-oxo-1-((R)-2-(phenanthren-9-yl)pyrrolidin-1-yl)butan-2-yl)thiourea (3e).** To a solution of crude (S)-3,3-dimethyl-1-oxo-1-

((R)-2-(phenanthren-9-yl)pyrrolidin-1-yl)butan-2-aminium chloride (obtained from the previous step, ~2.1 mmol) in CH<sub>2</sub>Cl<sub>2</sub> (14 mL) was added NEt<sub>3</sub> (860 μL, 6.2 mmol) dropwise. The mixture was stirred for 15 min, and

3,5-bis(trifluoromethyl)phenyl isothiocyanate (414 μL, 2.3 mmol) was added dropwise. The reaction was stirred overnight, concentrated under vacuum, and purified by silica gel flash chromatography to obtain the desired thiourea as pale yellow crystals (940 mg, 72% over two steps). IR (Film) 3328 (br), 2963, 1611, 1529, 1474, 1447, 1383, 1276 (s), 1177, 1134 (s), 962, 885, 749 cm<sup>-1</sup>; <sup>1</sup>H NMR (400MHz, CDCl<sub>3</sub>) δ = 9.66 (br. s., 1 H), 8.56 (d,  $J = 8.1$  Hz, 1 H), 8.47 (d,  $J = 8.4$  Hz, 1 H), 7.74 (br. s., 10 H), 5.82 (d,  $J = 8.1$  Hz, 1 H), 5.60 (d,  $J = 9.1$  Hz, 1 H), 4.84 (t,  $J = 9.1$  Hz, 1 H), 3.88 (dd,  $J = 9.9, 17.6$  Hz, 1 H), 2.48 - 2.31 (m, 1 H), 2.10 - 1.92 (m, 3 H), 1.16 (s, 9 H); <sup>13</sup>C NMR (100 MHz, CDCl<sub>3</sub>) δ = 181.1, 170.6, 139.6, 133.4, 131.8, 131.5, 131.2, 130.7, 129.5, 129.1, 128.6, 126.6, 126.4, 126.4, 126.0, 123.5, 123.3, 122.7, 122.1, 118.0, 63.1, 58.7, 48.8, 35.3, 32.2, 26.7, 23.3; MS (ESI-APCI) exact mass calculated for [M+H] (C<sub>33</sub>H<sub>30</sub>F<sub>6</sub>N<sub>3</sub>OS) requires  $m/z$  630.2, found  $m/z$  630.2;  $[\alpha]_D^{24} = +20.7$  ( $c = 1.0$ , CHCl<sub>3</sub>).

#### Characterization data for all novel catalysts in Table 1

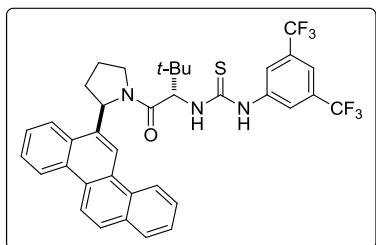

**1-(3,5-bis(trifluoromethyl)phenyl)-3-((S)-1-((R)-2-(chrysen-6-yl)pyrrolidin-1-yl)-3,3-dimethyl-1-oxobutan-2-yl)thiourea (3g).** IR (Film) 3327 (br), 2980, 1607 (s), 1525 (s), 1473, 1443,

1383 (s), 1275 (s), 1175 (s), 1133 (s), 961, 885, 758 cm<sup>-1</sup>; <sup>1</sup>H NMR (500 MHz, CDCl<sub>3</sub>) δ = 9.32 (br. s., 1H), 8.83 - 8.76 (m, 1H), 8.70 (d,  $J=8.3$  Hz, 1H), 8.54 (d,  $J=9.3$  Hz, 1H), 8.21 - 8.13 (m, 1H), 8.02 - 7.83 (m, 3H), 7.77 - 7.22 (m, 8H), 6.00 (d,  $J=8.3$

Hz, 1H), 5.95 (d,  $J=10.2$  Hz, 1H), 4.86 (t,  $J=6.6$  Hz, 1H), 4.12 - 4.00 (m, 1H), 2.53 - 2.46 (m, 1H), 2.14 - 2.01 (m, 3H), 1.18 (s, 9H); <sup>13</sup>C NMR (125 MHz, CDCl<sub>3</sub>) δ = 181.08, 170.71, 140.56, 139.88, 135.79, 134.36, 132.30, 132.11, 131.84, 131.58, 131.31, 130.44, 129.15, 128.98, 128.49, 127.71, 127.44, 127.04, 126.52, 124.63, 124.14, 123.66, 122.63, 122.04, 121.19, 120.91, 118.12, 116.61, 62.84, 58.98, 49.41, 47.45, 36.31, 33.60, 32.88, 27.28, 27.00, 23.59, 21.30; MS (ESI-APCI) exact mass calculated

for [M+Na] (C<sub>37</sub>H<sub>33</sub>F<sub>6</sub>N<sub>3</sub>NaOS) requires  $m/z$  704.2, found  $m/z$  704.2;  $[\alpha]_D^{24} = +107.4$  ( $c = 1.0$ , CH<sub>2</sub>Cl<sub>2</sub>).

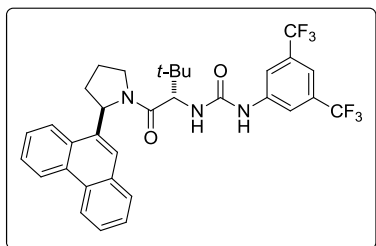

**1-(3,5-bis(trifluoromethyl)phenyl)-3-((S)-3,3-dimethyl-1-oxo-1-((R)-2-(phenanthren-9-yl)pyrrolidin-1-yl)butan-2-yl)urea (4e).** IR (Film) 3348 (br), 2979, 1701, 1610, 1568, 1474, 1443, 1387, 1275 (s), 1174 (s), 1128 (s), 949, 879, 747 cm<sup>-1</sup>; <sup>1</sup>H NMR (500 MHz, CDCl<sub>3</sub>)  $\delta = 8.69 - 8.26$  (m, 3H), 8.04 - 6.95 (m, 10H), 5.94 (d,  $J=7.8$  Hz, 1H), 4.92 (d,  $J=9.3$  Hz, 1H), 4.50 (t,  $J=8.5$  Hz, 1H), 3.91 (q,  $J=8.3$  Hz, 1H), 2.46 (d,  $J=6.8$  Hz, 1H), 2.17 - 1.93

(m, 3H), 1.17 (s, 9H); <sup>13</sup>C NMR (125 MHz, CDCl<sub>3</sub>)  $\delta = 172.06, 155.68, 154.97, 141.02, 135.46, 133.96, 132.19, 131.92, 131.14, 130.82, 130.34, 129.73, 129.32, 128.57, 127.24, 126.72, 126.59, 126.44, 125.02, 124.55, 123.59, 123.42, 122.77, 122.38, 119.98, 118.33, 115.48, 58.63, 57.57, 49.04, 47.42, 35.29, 34.84, 33.38, 32.35, 26.85, 23.60, 21.50$ ; MS (ESI-APCI) exact mass calculated for [M+H] (C<sub>33</sub>H<sub>32</sub>F<sub>6</sub>N<sub>3</sub>O<sub>2</sub>) requires  $m/z$  616.2, found  $m/z$  616.2;  $[\alpha]_D^{23} = +146.3$  ( $c = 1.0$ , CH<sub>2</sub>Cl<sub>2</sub>).

## References:

1. For the enantioselective synthesis of 2-aryl pyrrolidines, see: Campos, K. R., Klapars, A., Waldman, J. H., Dormer, P. G. & Chen, C.-Y. *J. Am. Chem. Soc.* **128**, 3538 (2006).

## 3. General procedures for thiourea-catalyzed ring opening of episulfonium ions

### Method A (for condition optimization):

An oven-dried 1.5 dram vial was charged with substrate **1a** (0.05 mmol, 1.0 equiv), thiourea catalyst (0.0050 mmol, 0.10 equiv), indole (0.10 mmol, 2.0 equiv) and 4Å molecular sieves (25 mg, powder, activated) under an atmosphere of N<sub>2</sub>. The vial was cooled to -30 °C, and toluene (1 mL) was added with stirring. Once the reactants and catalyst were fully dissolved, the mixture was cooled to -78 °C, and acid (0.0050 mmol, 0.10 equiv) was added via a 10 µL syringe (for liquid acid), or directly into the solution at once against a counterflow of N<sub>2</sub> (for solid acid). The resulting solution was stirred at -30 °C for 12 h, and NEt<sub>3</sub> (~10 µL) was added at -30 °C. The resulting mixture was applied directly to a pipette column containing 4-5 cm of silica gel, and product was isolated by eluting hexanes/EtOAc (20:1 to 10:1) and solvent removal under reduced pressure.

### Method B (for substrate scope):

An oven-dried 1.5 dram vial was charged with substrate **1** (0.05 mmol, 1.0 equiv), thiourea catalyst (0.0050 mmol, 0.10 equiv), nucleophile (0.10 mmol, 2.0 equiv) and 4Å molecular sieves (25 mg, powder, activated). The vial was cooled to -30 °C, and toluene (1 mL) was added with stirring. Once the reactants and catalyst were fully dissolved, the mixture was cooled to -78 °C, and solid 4-NBSA (0.7 mg, 0.0035 mmol, 0.07 equiv) was added at once against a counterflow of N<sub>2</sub>. The resulting solution was stirred at -30 °C and the progress of the reaction was monitored by TLC.<sup>a</sup> When the progress of the reaction was determined to be complete (see SI-15 for reaction time), NEt<sub>3</sub> (~10 µL) was added at -30 °C. The resulting mixture was applied directly to a pipette column containing 4-5 cm of silica gel, and product was isolated by eluting hexanes/EtOAc (20:1 to 10:1) and solvent removal.

<sup>a</sup> Retired GC column was cut into pieces and used as the capillary tubes. A properly sized needle containing a piece of GC column inside was used to pierce the septa of the reaction vial, and an aliquot for TLC analysis was taken using the GC column and applied directly on the silica gel TLC place.

#### 4. Catalyst structure investigations

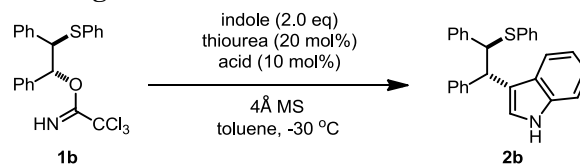

Investigation of the arylpyrrolidine moiety has been presented in the main text.

Investigation of the amino acid linker:

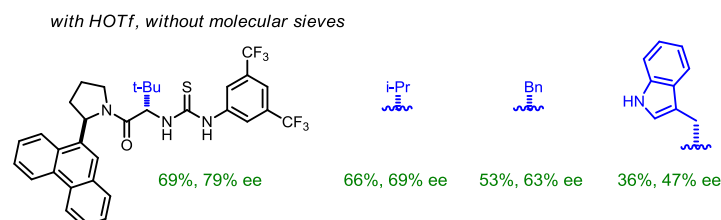

Investigation of the thiourea unit:

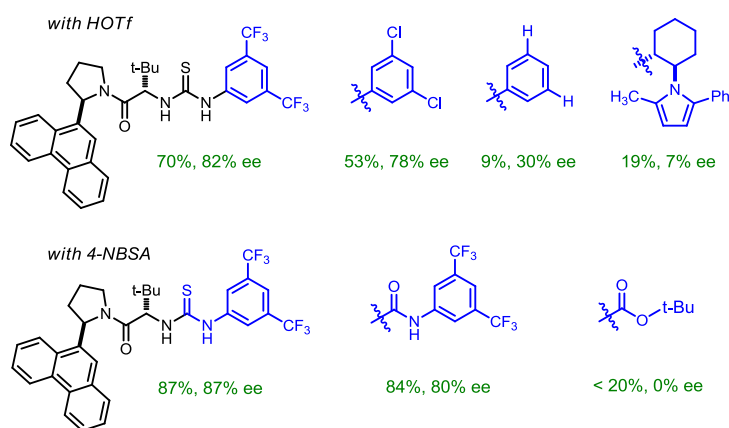

Investigation of the aryl substituent on the pyrrolidino amide portion:

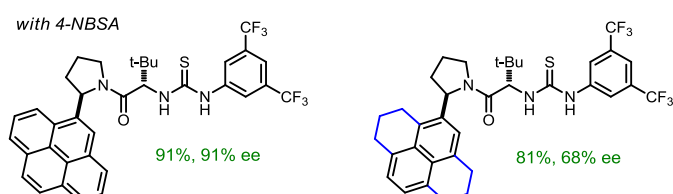

The chiral phosphoric acid that Toste and coworkers used in their episulfonium ion ring opening with alcohols does not work well in this indole alkylation reaction:

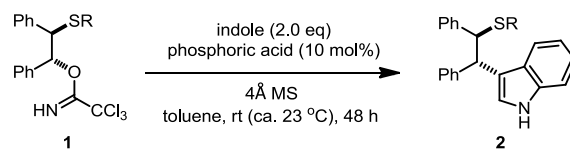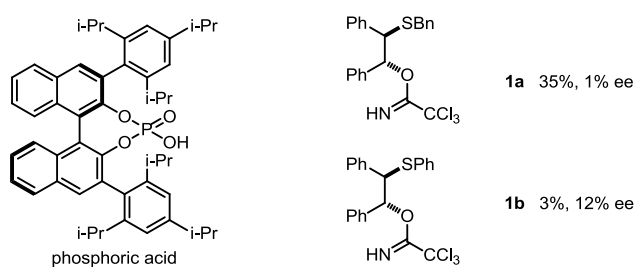

Note: at -30 °C, no desired product was observed (by TLC) after 48 h.

## 5. Preparation and characterization of substrates 1a-1z

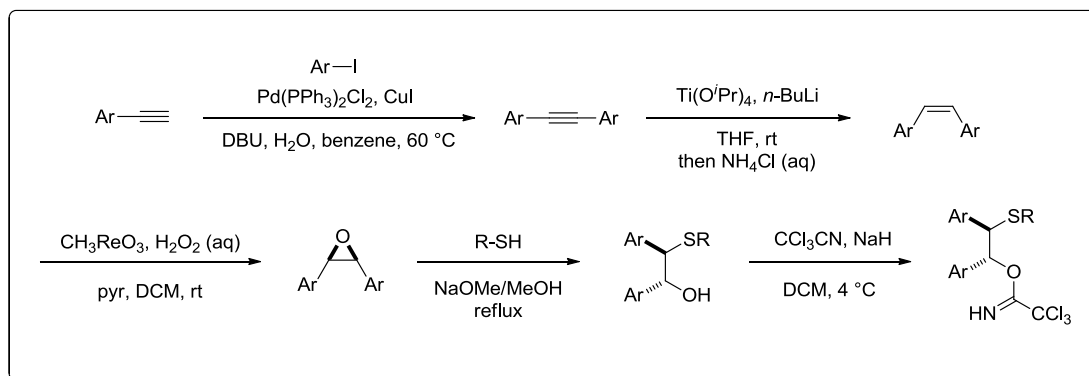

### Sonogashira coupling

An oven-dried round bottom flask was charged with CuI (10 mol%), Pd(PPh<sub>3</sub>)<sub>2</sub>Cl<sub>2</sub> (2 mol%) and flushed with N<sub>2</sub>. Aryl iodide (1.1 equiv) in anhydrous benzene (0.2 M) was added, followed by water (0.4 equiv) and DBU (6.0 equiv) sequentially. Arylacetylene (1.0 equiv) was added at last. The flask was packaged with aluminum foil and heated to 60 °C. After TLC showed complete conversion of arylacetylene, the reaction was cooled down to room temperature, and quenched by saturate NH<sub>4</sub>Cl (aq). After diluted with EtOAc, the mixture was stirred for 5 min before partition of the aqueous and organic layers. The aqueous layer was extracted with EtOAc. The combined organic layers were washed with brine, dried over NaSO<sub>4</sub>, concentrated, and the crude extracts were purified by silica gel column chromatography to obtain the coupling product.

### Ti-mediated reduction of diarylacetylene

An oven-dried flask was charged with diarylacetylene (1.0 equiv) and flushed with N<sub>2</sub>. THF (0.23 M) was added and the solution was cooled down to -78 °C. Freshly distilled titanium tetraisopropoxide (2.0 equiv) was added, followed by *n*-butyllithium (2.5 M in hexanes, 4 equiv) via syringe pump over 10 min. The resulting yellow/orange solution was warmed to room temperature and stirred for 2–4 h until the starting material was consumed. Saturated NH<sub>4</sub>Cl (aq) was added slowly and carefully to quench the reaction (ice bath may be necessary). The mixture was diluted with EtOAc and stirred for 10 min. The aqueous layer was separated and extracted with EtOAc. The combined organic layers were washed with brine, dried over NaSO<sub>4</sub>, concentrated, and the crude extracts were purified by silica gel column chromatography to obtain the reduction product.

### Epoxidation of *cis*-diarylethene

A round bottom flask was charged with *cis*-diarylethene (1.0 equiv) and DCM (0.4 M). The mixture was cooled to 0 °C, and methylrhenium trioxide (2.5-10%, electron-deficient substrate required more rhenium catalyst) was added. Pyridine (13 mol%) and hydrogen peroxide (30% wt. aqueous solution, 1.5-5.0 equiv, electron-deficient substrate required more oxidant). The resulting yellow biphasic mixture was warmed to room temperature and stirred vigorously until TLC showed complete conversion of the alkene (usually 24-120 h). Manganese dioxide (~10 mg) was added carefully to decompose remaining hydrogen peroxide and the mixture was allowed to age for 20 min. Peroxides test sticks were used to evaluate the amount of remaining peroxide. The aqueous layer was separated and extracted with DCM. In case there was a detectable amount of peroxide residue, the combined organic layers after extraction were washed with aqueous sodium thiosulfate solution until no peroxide was

detected. Otherwise, the combined organic layers were washed with brine, dried over NaSO<sub>4</sub>, concentrated, and the crude extracts were purified by silica gel column chromatography to obtain the epoxidation product.

### Epoxide opening with thiol

An oven-dried flask was charged with benzyl mercaptan (1.6 equiv), sodium methoxide (0.5 M in methanol, 1.5 equiv) and a refluxing condenser. The solution was heated to reflux and stirred for 10 min. After cooling down to room temperature, *cis*-diarylepoide (1.0 equiv) was added to the resulting sodium benzylthiolate solution neat or as a stock solution in methanol (~2 M). The mixture was again brought to 60 °C and stirred for ca. 4 h until all starting material was consumed. The reaction was cooled down to room temperature, diluted with EtOAc, and quenched by addition of water. The aqueous layer was separated and extracted with EtOAc. The combined organic layers were washed with brine, dried over NaSO<sub>4</sub>, concentrated, and the crude extracts were purified by silica gel column chromatography to obtain the sulfanyl alcohol product.

### Trichloroacetimidate synthesis

To a solution of 1,2-diaryl-2-sulfanylethanol (1.0 equiv) in DCM (0.5 M) at 0 °C was added trichloroacetonitrile (2.0 equiv) followed by sodium hydride (20 mol%). The reaction was stirred at that temperature overnight before quenched by addition of water. The resulting mixture was separated, and the aqueous layer was extracted with EtOAc. The combined organic layers were washed with brine, dried over Na<sub>2</sub>SO<sub>4</sub> and concentrated. The crude extracts were purified by silica gel column chromatography (hexanes/EtOAc with 1% NEt<sub>3</sub>) to obtain the trichloroacetimidate product.

### Characterization data for substrates 1a-1z

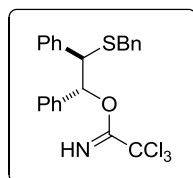

#### 2-(benzylthio)-1,2-diphenylethyl 2,2,2-trichloroacetimidate (1a)

IR (Film): 3337, 3029, 1663 (s), 1583, 1493, 1453, 1322, 1287 (s), 1071 (s), 991, 793 (s), 696 (s) cm<sup>-1</sup>; <sup>1</sup>H NMR: (500 MHz, CDCl<sub>3</sub>) δ 8.34 (s, 1H), 7.41 - 7.17 (m, 11H), 7.17 - 7.01 (m, 4H), 6.14 (d, *J*=7.3 Hz, 1H), 4.18 (d, *J*=7.3 Hz, 1H), 3.72 (d, *J*=13.2 Hz, 1H), 3.57 (d, *J*=13.2 Hz, 1H); <sup>13</sup>C NMR: (125 MHz, CDCl<sub>3</sub>) δ 161.06, 137.97, 137.67, 137.21, 129.16, 129.05, 128.34, 128.11, 128.04, 127.76, 127.48, 127.04, 126.96, 83.32, 54.64, 36.16; MS (ESI-APCI) exact mass calculated for [M-(CCl<sub>3</sub>C=NHO)] (C<sub>21</sub>H<sub>19</sub>S) requires *m/z* 303.1, found *m/z* 303.1.

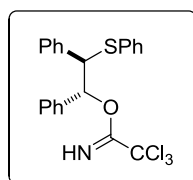

#### 1,2-diphenyl-2-(phenylthio)ethyl 2,2,2-trichloroacetimidate (1b)

IR (Film): 3338, 3031, 1663 (s), 1583, 1479, 1453, 1322, 1288 (s), 1071 (s), 992, 835, 794 (s), 696 (s) cm<sup>-1</sup>; <sup>1</sup>H NMR: (500 MHz, CDCl<sub>3</sub>) δ 8.37 (br. s., 1H), 7.28 (d, *J*=7.3 Hz, 4H), 7.23 (m, 5H), 7.20 - 6.96 (m, 6H), 6.23 (d, *J*=6.8 Hz, 1H), 4.74 (d, *J*=7.3 Hz, 1H); <sup>13</sup>C NMR: (125 MHz, CDCl<sub>3</sub>) δ 161.07, 137.89, 136.78, 134.81, 131.69, 129.13, 128.69, 128.20, 127.90, 127.79, 127.43, 127.27, 126.90, 82.48, 58.82; MS (ESI-APCI) exact mass calculated for [M-(CCl<sub>3</sub>C=NHO)] (C<sub>20</sub>H<sub>17</sub>S) requires *m/z* 289.1, found *m/z* 289.0.



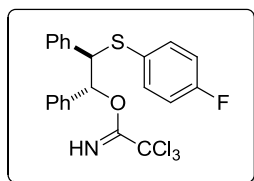

**1,2-diphenyl-2-(p-tolylthio)ethyl 2,2,2-trichloroacetimidate (1c)**

IR (Film): 3339, 3032, 1663 (s), 1588, 1489 (s), 1453, 1322, 1289 (s), 1226 (s), 1156, 1071 (s), 991, 829, 793 (s), 696 (s)  $\text{cm}^{-1}$ ;  $^1\text{H}$  NMR: (500 MHz,  $\text{CDCl}_3$ )  $\delta$  8.38 (s, 1H), 7.43 - 7.19 (m, 7H), 7.19 - 7.12 (m, 3H), 7.12 - 7.02 (m, 2H), 6.95 - 6.76 (m, 2H), 6.22 (d,  $J=7.8$  Hz, 1H), 4.62 (d,  $J=7.3$  Hz, 1H);

$^{13}\text{C}$  NMR: (125 MHz,  $\text{CDCl}_3$ )  $\delta$  163.34, 161.37, 161.08, 137.78, 136.87, 135.10, 135.04, 129.11, 128.25, 127.96, 127.88, 127.50, 127.25, 115.87, 115.69, 82.31, 60.05; MS (ESI-APCI) exact mass calculated for  $[\text{M}-(\text{CCl}_3\text{C}=\text{NHO})]$  ( $\text{C}_{20}\text{H}_{16}\text{FS}$ ) requires  $m/z$  307.1, found  $m/z$  307.0.

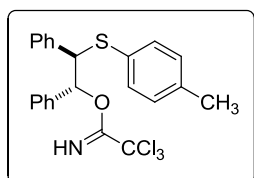

**2-((4-fluorophenyl)thio)-1,2-diphenylethyl 2,2,2-trichloroacetimidate (1d)**

IR (Film): 3338, 3031, 1663 (s), 1492, 1453, 1322, 1288 (s), 1073 (s), 991, 794 (s), 697 (s)  $\text{cm}^{-1}$ ;  $^1\text{H}$  NMR: (500 MHz,  $\text{CDCl}_3$ )  $\delta$  8.36 (s, 1H), 7.33 - 7.09 (m, 12H), 6.99 (d,  $J=8.3$  Hz, 2H), 6.22 (d,  $J=6.8$  Hz, 1H), 4.66 (d,  $J=7.3$  Hz, 1H), 2.27 (s, 3H);  $^{13}\text{C}$  NMR: (125 MHz,  $\text{CDCl}_3$ )  $\delta$  161.09, 138.11, 137.18, 136.85, 132.44, 130.97, 129.51, 129.19, 128.15, 127.85, 127.77, 127.33, 82.39, 59.35, 21.04; MS (ESI-APCI) exact mass calculated for  $[\text{M}-(\text{CCl}_3\text{C}=\text{NHO})]$  ( $\text{C}_{21}\text{H}_{19}\text{S}$ ) requires  $m/z$  303.1, found  $m/z$  303.1.

$^{13}\text{C}$  NMR: (125 MHz,  $\text{CDCl}_3$ )  $\delta$  161.09, 138.11, 137.18, 136.85, 132.44, 130.97, 129.51, 129.19, 128.15, 127.85, 127.77, 127.33, 82.39, 59.35, 21.04; MS (ESI-APCI) exact mass calculated for  $[\text{M}-(\text{CCl}_3\text{C}=\text{NHO})]$  ( $\text{C}_{21}\text{H}_{19}\text{S}$ ) requires  $m/z$  303.1, found  $m/z$  303.1.

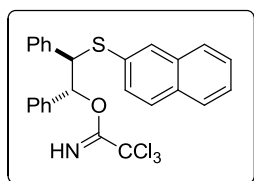

**2-(naphthalen-2-ylthio)-1,2-diphenylethyl 2,2,2-trichloroacetimidate (1e)**

IR (Film): 3336, 3056, 1664 (s), 1586, 1497, 1453, 1322, 1290(s), 1072 (s), 992, 794 (s), 697 (s)  $\text{cm}^{-1}$ ;  $^1\text{H}$  NMR: (500 MHz,  $\text{CDCl}_3$ )  $\delta$  8.40 (s, 1H), 7.76 (s, 2H), 7.71 - 7.59 (m, 2H), 7.52 - 7.38 (m, 2H), 7.35 (dd,  $J=1.7, 8.5$  Hz, 1H), 7.31 - 7.22 (m, 5H), 7.22 - 7.09 (m, 5H), 6.29 (d,  $J=7.3$  Hz, 1H), 4.86 (d,  $J=6.8$  Hz, 1H);  $^{13}\text{C}$  NMR: (125 MHz,  $\text{CDCl}_3$ )  $\delta$  161.12, 137.91, 136.83, 133.53, 132.31, 132.10, 130.26, 129.13, 129.06, 128.24, 128.20, 127.98, 127.84, 127.56, 127.52, 127.31, 126.31, 125.95, 82.55, 58.78; MS (ESI-APCI) exact mass calculated for  $[\text{M}-(\text{CCl}_3\text{C}=\text{NHO})]$  ( $\text{C}_{24}\text{H}_{19}\text{S}$ ) requires  $m/z$  339.1, found  $m/z$  339.1.

$^{13}\text{C}$  NMR: (125 MHz,  $\text{CDCl}_3$ )  $\delta$  161.12, 137.91, 136.83, 133.53, 132.31, 132.10, 130.26, 129.13, 129.06, 128.24, 128.20, 127.98, 127.84, 127.56, 127.52, 127.31, 126.31, 125.95, 82.55, 58.78; MS (ESI-APCI) exact mass calculated for  $[\text{M}-(\text{CCl}_3\text{C}=\text{NHO})]$  ( $\text{C}_{24}\text{H}_{19}\text{S}$ ) requires  $m/z$  339.1, found  $m/z$  339.1.

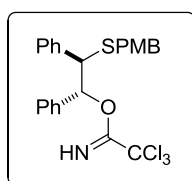

**2-((4-methoxybenzyl)thio)-1,2-diphenylethyl 2,2,2-trichloroacetimidate (1f)**

IR (Film): 3338, 2980 (s), 2889, 1663 (s), 1609, 1510, 1453, 1382, 1299, 1249 (s), 1174, 1073 (s), 991, 825, 794 (s), 697 (s)  $\text{cm}^{-1}$ ;  $^1\text{H}$  NMR: (500 MHz,  $\text{CDCl}_3$ )  $\delta$  8.33 (s, 1H), 7.35 - 7.17 (m, 6H), 7.17 - 7.05 (m, 6H), 6.80 (d,  $J=8.8$  Hz, 2H), 6.12 (d,  $J=7.3$  Hz, 1H), 4.17 (d,  $J=7.3$  Hz, 1H), 3.80 (s, 3H), 3.67 (d,  $J=13.2$  Hz, 1H), 3.52 (d,  $J=13.2$  Hz, 1H);  $^{13}\text{C}$  NMR: (125 MHz,  $\text{CDCl}_3$ )  $\delta$  161.34, 158.85, 138.34, 137.52, 130.41, 129.45, 128.36, 128.31, 128.02, 127.72, 127.33, 114.02, 83.62, 55.53, 54.80, 35.84; MS (ESI-APCI) exact mass calculated for  $[\text{M}-(\text{CCl}_3\text{C}=\text{NHO})]$  ( $\text{C}_{22}\text{H}_{21}\text{OS}$ ) requires  $m/z$  333.1, found  $m/z$  333.1.

$^{13}\text{C}$  NMR: (125 MHz,  $\text{CDCl}_3$ )  $\delta$  161.34, 158.85, 138.34, 137.52, 130.41, 129.45, 128.36, 128.31, 128.02, 127.72, 127.33, 114.02, 83.62, 55.53, 54.80, 35.84; MS (ESI-APCI) exact mass calculated for  $[\text{M}-(\text{CCl}_3\text{C}=\text{NHO})]$  ( $\text{C}_{22}\text{H}_{21}\text{OS}$ ) requires  $m/z$  333.1, found  $m/z$  333.1.

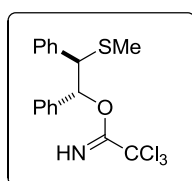

**2-(methylthio)-1,2-diphenylethyl 2,2,2-trichloroacetimidate (1g)**

IR (Film): 3338, 3031, 2916, 1663 (s), 1492, 1453, 1288 (s), 1072 (s), 793 (s), 696 (s)  $\text{cm}^{-1}$ ;  $^1\text{H}$  NMR: (500 MHz,  $\text{CDCl}_3$ )  $\delta$  8.35 (s, 1H), 7.37 - 7.15 (m, 10H), 6.14 (d,  $J=7.8$  Hz, 1H), 4.29 (d,  $J=7.8$  Hz, 1H), 1.98 (s, 3H);  $^{13}\text{C}$  NMR: (125 MHz,  $\text{CDCl}_3$ )  $\delta$  161.09, 137.67, 137.29, 129.08, 128.14, 128.11, 127.82, 127.49, 127.05, 83.25, 57.31, 15.22; MS (ESI-APCI) exact mass calculated for  $[\text{M}-(\text{CCl}_3\text{C}=\text{NHO})]$  ( $\text{C}_{15}\text{H}_{15}\text{S}$ ) requires  $m/z$  227.1, found  $m/z$  227.1.

$^{13}\text{C}$  NMR: (125 MHz,  $\text{CDCl}_3$ )  $\delta$  161.09, 137.67, 137.29, 129.08, 128.14, 128.11, 127.82, 127.49, 127.05, 83.25, 57.31, 15.22; MS (ESI-APCI) exact mass calculated for  $[\text{M}-(\text{CCl}_3\text{C}=\text{NHO})]$  ( $\text{C}_{15}\text{H}_{15}\text{S}$ ) requires  $m/z$  227.1, found  $m/z$  227.1.

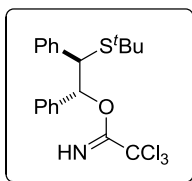

**2-(*tert*-butylthio)-1,2-diphenylethyl 2,2,2-trichloroacetimidate (1h)**

IR (Film): 3340, 3030, 2960, 1663 (s), 1493, 1453, 1322, 1290 (s), 1159, 1074 (s), 988, 853, 795 (s), 698 (s)  $\text{cm}^{-1}$ ;  $^1\text{H}$  NMR: (500 MHz,  $\text{CDCl}_3$ )  $\delta$  8.31 (s, 1H), 7.29 - 7.07 (m, 10H), 6.12 (d,  $J=5.4$  Hz, 1H), 4.31 (d,  $J=5.4$  Hz, 1H), 1.20 (s, 9H);  $^{13}\text{C}$  NMR: (125 MHz,  $\text{CDCl}_3$ )  $\delta$  161.49, 141.04, 137.26, 129.79, 128.28, 128.23, 128.04, 127.90, 127.80, 127.60, 127.22, 127.11, 83.80, 52.68, 44.48, 31.46; MS (ESI-APCI) exact mass calculated for  $[\text{M}-(\text{CCl}_3\text{C}=\text{NHO})]$  ( $\text{C}_{20}\text{H}_{17}\text{S}$ ) requires  $m/z$  289.1, found  $m/z$  289.0.

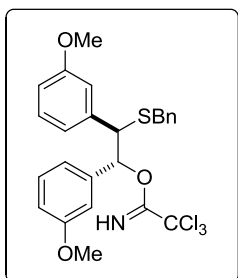

**2-(benzylthio)-1,2-bis(3-methoxyphenyl)ethyl 2,2,2-trichloroacetimidate (1r)**

IR (Film): 3337, 2980, 2835, 1664 (s), 1600 (s), 1491 (s), 1285, 1262 (s), 1153, 1071 (s), 994, 832, 794 (s), 695 (s)  $\text{cm}^{-1}$ ;  $^1\text{H}$  NMR: (500 MHz,  $\text{CDCl}_3$ )  $\delta$  8.35 (s, 1H), 7.40 - 7.19 (m, 5H), 7.19 - 7.02 (m, 2H), 6.86 - 6.71 (m, 4H), 6.71 - 6.55 (m, 2H), 6.09 (d,  $J=6.8$  Hz, 1H), 4.12 (d,  $J=6.8$  Hz, 1H), 3.70 (s, 3H), 3.71 (d,  $J=12.7$  Hz, 5H), 3.66 (s, 3H), 3.58 (d,  $J=13.2$  Hz, 1H);  $^{13}\text{C}$  NMR: (125 MHz,  $\text{CDCl}_3$ )  $\delta$  161.00, 159.36, 159.03, 139.53, 138.73, 137.69, 129.08, 128.78, 128.33, 126.97, 121.64, 119.39, 114.40, 114.05, 113.47, 112.07, 91.45, 83.05, 55.18, 55.07, 54.67, 36.23; MS (ESI-APCI) exact mass calculated for  $[\text{M}-(\text{CCl}_3\text{C}=\text{NHO})]$  ( $\text{C}_{23}\text{H}_{23}\text{O}_2\text{S}$ ) requires  $m/z$  363.1, found  $m/z$  363.1.

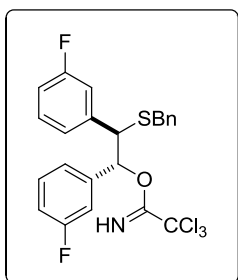

**2-(benzylthio)-1,2-bis(3-fluorophenyl)ethyl 2,2,2-trichloroacetimidate (1s)**

IR (Film): 3340, 3029, 1665 (s), 1614, 1591 (s), 1488 (s), 1449 (s), 1300, 1282, 1253, 1140, 1069 (s), 1000, 912, 879, 833, 794 (s), 739, 691 (s), 648  $\text{cm}^{-1}$ ;  $^1\text{H}$  NMR: (500 MHz,  $\text{CDCl}_3$ )  $\delta$  8.38 (s, 1H), 7.38 - 7.15 (m, 7H), 7.09 - 6.85 (m, 6H), 6.08 (d,  $J=6.8$  Hz, 1H), 4.10 (d,  $J=6.8$  Hz, 1H), 3.72 (d,  $J=13.2$  Hz, 1H), 3.56 (d,  $J=13.2$  Hz, 1H);  $^{13}\text{C}$  NMR: (125 MHz,  $\text{CDCl}_3$ )  $\delta$  163.55, 163.32, 161.59, 160.90, 140.45, 139.43, 137.20, 129.67, 129.61, 129.44, 129.00, 128.45, 127.18, 124.78, 122.71, 116.14, 115.96, 115.29, 115.12, 114.79, 114.62, 114.00, 113.82, 91.13, 82.12, 53.89, 36.16; MS (ESI-APCI) exact mass calculated for  $[\text{M}-(\text{CCl}_3\text{C}=\text{NHO})]$  ( $\text{C}_{21}\text{H}_{17}\text{F}_2\text{S}$ ) requires  $m/z$  339.1, found  $m/z$  339.1.

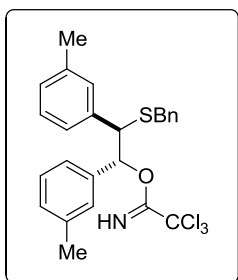

**2-(benzylthio)-1,2-di-*m*-tolylethyl 2,2,2-trichloroacetimidate (1t)**

IR (Film): 3338, 3027, 2919, 1663 (s), 1606, 1491, 1453, 1287 (s), 1071 (s), 988, 832, 794 (s), 697 (s)  $\text{cm}^{-1}$ ;  $^1\text{H}$  NMR: (500 MHz,  $\text{CDCl}_3$ )  $\delta$  8.32 (s, 1H), 7.38 - 7.16 (m, 5H), 7.16 - 7.05 (m, 2H), 7.05 - 6.85 (m, 6H), 6.08 (d,  $J=6.8$  Hz, 1H), 4.11 (d,  $J=6.8$  Hz, 1H), 3.68 (d,  $J=13.7$  Hz, 1H), 3.55 (d,  $J=13.2$  Hz, 1H), 2.24 (s, 3H), 2.27 (s, 3H);  $^{13}\text{C}$  NMR: (125 MHz,  $\text{CDCl}_3$ )  $\delta$  161.36, 138.33, 137.52, 130.11, 129.32, 129.02, 128.55, 128.45, 128.13, 127.91, 127.86, 127.15, 126.52, 124.26, 83.62, 54.99, 36.46, 21.62, 21.56; MS (ESI-APCI) exact mass calculated for  $[\text{M}-(\text{CCl}_3\text{C}=\text{NHO})]$  ( $\text{C}_{23}\text{H}_{23}\text{S}$ ) requires  $m/z$  331.2, found  $m/z$  331.2.

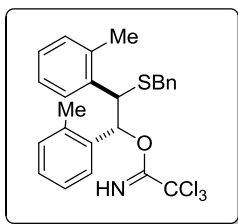

**2-(benzylthio)-1,2-di-*o*-tolylethyl 2,2,2-trichloroacetimidate (1u)**

IR (Film): 2980 (s), 2888, 3031, 1662 (s), 1491, 1461, 1382 (s), 1251, 1152 (s), 1073 (s), 954 (s), 829, 795, 739  $\text{cm}^{-1}$ ;  $^1\text{H}$  NMR: (500 MHz,  $\text{CDCl}_3$ )  $\delta$  8.33 (s, 1H), 7.61 (d,  $J=7.3$  Hz, 1H), 7.52 (d,  $J=7.3$  Hz, 1H), 7.40 - 7.20 (m, 5H), 7.20 - 7.07 (m, 3H), 7.05 (t,  $J=7.6$  Hz, 1H), 6.89 (d,  $J=7.3$  Hz, 1H), 6.84 (d,  $J=7.8$  Hz, 1H), 6.28 (d,  $J=9.3$  Hz, 1H), 4.47 (d,  $J=9.8$  Hz, 1H), 3.98 (d,  $J=13.2$  Hz, 1H), 3.65 (d,  $J=13.7$  Hz, 1H), 2.00 (s, 3H), 1.43 (s, 3H);  $^{13}\text{C}$  NMR: (125 MHz,  $\text{CDCl}_3$ )  $\delta$  160.90, 138.33, 136.59, 136.36, 135.92, 130.08, 129.81, 129.31, 129.18, 128.42, 128.04, 127.24, 126.97, 126.78, 126.03, 125.55, 81.33, 48.59, 36.99, 19.06, 18.68; MS (ESI-APCI) exact mass calculated for  $[\text{M}-(\text{CCl}_3\text{C}=\text{NHO})]$  ( $\text{C}_{23}\text{H}_{23}\text{S}$ ) requires  $m/z$  331.2, found  $m/z$  331.2.

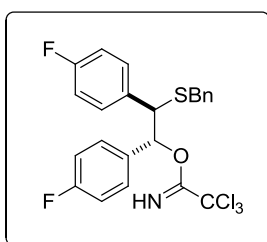

**2-(benzylthio)-1,2-bis(4-fluorophenyl)ethyl 2,2,2-trichloroacetimidate (1v)**

IR (Film): 3339, 1727 (s), 1665 (s), 1603 (s), 1508 (s), 1453, 1295, 1225 (s), 1158, 1071 (s), 994, 832 (s), 796 (s)  $\text{cm}^{-1}$ ;  $^1\text{H}$  NMR: (500 MHz,  $\text{CDCl}_3$ )  $\delta$  8.35 (s, 1H), 7.36 - 7.12 (m, 5H), 7.12 - 6.95 (m, 4H), 6.95 - 6.72 (m, 4H), 6.06 (d,  $J=6.8$  Hz, 1H), 4.13 (d,  $J=6.8$  Hz, 1H), 3.71 (d,  $J=13.7$  Hz, 1H), 3.55 (d,  $J=13.7$  Hz, 1H);  $^{13}\text{C}$  NMR: (125 MHz,  $\text{CDCl}_3$ )  $\delta$  165.24, 163.06, 160.91, 137.37, 133.32, 132.57, 130.87, 130.80, 130.22, 128.99, 128.87, 128.81, 128.43, 127.13, 115.13, 114.96, 114.91, 114.73, 82.31, 53.54, 36.08; MS (ESI-APCI) exact mass calculated for  $[\text{M}-(\text{CCl}_3\text{C}=\text{NHO})]$  ( $\text{C}_{21}\text{H}_{17}\text{F}_2\text{S}$ ) requires  $m/z$  339.1, found  $m/z$  339.1.

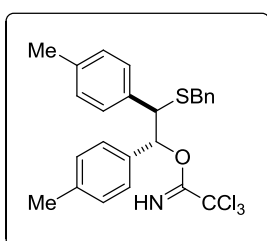

**2-(benzylthio)-1,2-di-*p*-tolylethyl 2,2,2-trichloroacetimidate (1w)**

IR (Film): 3338, 3027, 2920, 1664 (s), 1513, 1453, 1320, 1288 (s), 1073 (s), 985, 832, 794 (s), 741, 701, 646 (s)  $\text{cm}^{-1}$ ;  $^1\text{H}$  NMR: (500 MHz,  $\text{CDCl}_3$ )  $\delta$  8.31 (s, 1H), 7.39 - 7.16 (m, 5H), 7.16 - 6.92 (m, 8H), 6.08 (d,  $J=7.3$  Hz, 1H), 4.14 (d,  $J=7.3$  Hz, 1H), 3.69 (d,  $J=13.2$  Hz, 1H), 3.55 (d,  $J=13.2$  Hz, 1H), 2.27 (s, 3H), 2.30 (s, 3H);  $^{13}\text{C}$  NMR: (125 MHz,  $\text{CDCl}_3$ )  $\delta$  161.10, 137.85, 137.69, 137.03, 134.95, 134.30, 129.08, 129.04, 128.82, 128.49, 128.31, 127.03, 126.89, 91.53, 83.32, 54.33, 36.13, 21.20, 21.12; MS (ESI-APCI) exact mass calculated for  $[\text{M}-(\text{CCl}_3\text{C}=\text{NHO})]$  ( $\text{C}_{23}\text{H}_{23}\text{S}$ ) requires  $m/z$  331.1, found  $m/z$  331.2.

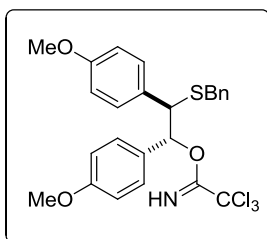

**2-(benzylthio)-1,2-bis(4-methoxyphenyl)ethyl 2,2,2-trichloroacetimidate (1x)**

IR (Film): 3336, 2980 (s), 1662 (s), 1633, 1610 (s), 1511 (s), 1454, 1381, 1302, 1248 (s), 1175 (s), 1072 (s), 1032 (s), 970, 829, 793 (s),  $\text{cm}^{-1}$ ;  $^1\text{H}$  NMR: (500 MHz,  $\text{CDCl}_3$ )  $\delta$  8.32 (s, 1H), 7.37 - 7.17 (m, 5H), 7.04 (d,  $J=8.8$  Hz, 2H), 7.02 (d,  $J=8.8$  Hz, 2H), 6.74 (d,  $J=8.8$  Hz, 2H), 6.72 (d,  $J=8.8$  Hz, 2H), 6.05 (d,  $J=7.3$  Hz, 1H), 4.16 (d,  $J=7.3$  Hz, 1H), 3.85 - 3.76 (m, 5H), 3.76 - 3.72 (m, 3H), 3.70 (d,  $J=13.2$  Hz, 1H), 3.56 (d,  $J=13.2$  Hz, 1H);  $^{13}\text{C}$  NMR: (125 MHz,  $\text{CDCl}_3$ )  $\delta$  161.04, 159.20, 158.75, 137.84, 130.32, 129.81, 129.24, 129.04, 128.44, 128.31, 126.89, 113.42, 113.11, 91.53, 83.06, 55.14, 55.06, 53.91, 36.02; MS (ESI-APCI) exact mass calculated for  $[\text{M}-(\text{CCl}_3\text{C}=\text{NHO})]$  ( $\text{C}_{23}\text{H}_{23}\text{O}_2\text{S}$ ) requires  $m/z$  363.1, found  $m/z$  363.1.

### 2-(benzylthio)-1,2-bis(4-(trifluoromethyl)phenyl)ethyl

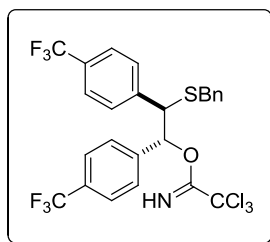

#### 2,2,2-trichloroacetimidate (1y)

IR (Film): 3342, 2980, 1667 (s), 1619, 1419, 1323 (s), 1165 (s), 1124 (s), 1067 (s), 1001, 992, 834, 796 (s)  $\text{cm}^{-1}$ ;  $^1\text{H NMR}$ : (500 MHz,  $\text{CDCl}_3$ )  $\delta$  8.39 (s, 1H), 7.48 (dd,  $J=4.4, 8.3$  Hz, 4H), 7.40 - 7.19 (m, 7H), 7.14 (dd,  $J=1.7, 7.6$  Hz, 2H), 6.16 (d,  $J=5.9$  Hz, 1H), 4.15 (d,  $J=5.9$  Hz, 1H), 3.72 (d,  $J=13.7$  Hz, 1H), 3.53 (d,  $J=13.7$  Hz, 1H);  $^{13}\text{C NMR}$ : (125 MHz,  $\text{CDCl}_3$ )  $\delta$  160.77, 141.83, 140.57, 136.91, 129.57, 128.94, 128.49, 127.26, 125.17, 124.92, 122.78, 90.97, 81.86, 53.65, 36.16; MS (ESI-APCI) exact mass calculated for  $[\text{M}-(\text{CCl}_3\text{C}=\text{NHO})]$  ( $\text{C}_{23}\text{H}_{17}\text{F}_6\text{S}$ ) requires  $m/z$  439.1, found  $m/z$  439.0.

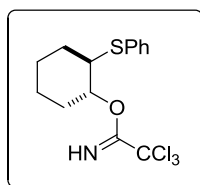

#### 2-(benzylthio)cyclohexyl 2,2,2-trichloroacetimidate (1z)

IR (Film): 3343, 2938, 2860, 1660 (s), 1584, 1480, 1439, 1322, 1298 (s), 1073 (s), 1015, 975, 829, 794 (s), 645  $\text{cm}^{-1}$ ;  $^1\text{H NMR}$ : (500 MHz,  $\text{CDCl}_3$ )  $\delta$  8.33 (s, 1H), 7.62 - 7.40 (m, 2H), 7.40 - 7.20 (m, 3H), 4.99 (dt,  $J=3.9, 7.8$  Hz, 1H), 3.42 (dt,  $J=4.4, 8.1$  Hz, 1H), 2.43 - 2.19 (m, 2H), 2.19 - 2.00 (m, 1H), 1.93 - 1.71 (m, 3H), 1.71 - 1.53 (m, 3H), 1.53 - 1.32 (m, 3H);  $^{13}\text{C NMR}$ : (125 MHz,  $\text{CDCl}_3$ )  $\delta$  162.10, 134.70, 132.44, 129.04, 127.20, 78.72, 49.16, 30.94, 28.84, 24.06, 22.80; MS (ESI-APCI) exact mass calculated for  $[\text{M}-(\text{CCl}_3\text{C}=\text{NHO})]$  ( $\text{C}_{13}\text{H}_{17}\text{S}$ ) requires  $m/z$  191.1, found  $m/z$  191.1.

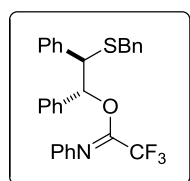

#### 2-(benzylthio)-1,2-diphenylethyl 2,2,2-trifluoro-N-phenylacetimidate (1a')

IR (Film): 3031, 1707 (s), 1598, 1490, 1453, 1310, 1207 (s), 1137 (s), 1073, 1028, 968, 913, 695 (s)  $\text{cm}^{-1}$ ;  $^1\text{H NMR}$ : (500 MHz,  $\text{CDCl}_3$ )  $\delta$  7.44 - 7.20 (m, 13H), 7.20 - 6.97 (m, 5H), 6.61 (d,  $J=7.8$  Hz, 2H), 6.25 (br. s., 1H), 4.21 (d,  $J=7.8$  Hz, 1H), 3.76 (d,  $J=13.3$  Hz, 1H), 3.62 (d,  $J=13.3$  Hz, 1H);  $^{13}\text{C NMR}$ : (125 MHz,  $\text{CDCl}_3$ )  $\delta$  143.93, 137.82, 137.59, 136.97, 129.09, 129.00, 128.54, 128.41, 128.23, 128.11, 127.86, 127.55, 127.25, 127.05, 123.78, 119.33, 81.90, 54.17, 36.36; MS (ESI-APCI) exact mass calculated for  $[\text{M}-(\text{CCl}_3\text{C}=\text{NHO})]$  ( $\text{C}_{21}\text{H}_{19}\text{S}$ ) requires  $m/z$  303.1, found  $m/z$  303.1.

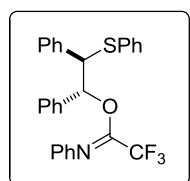

#### 1,2-diphenyl-2-(phenylthio)ethyl 2,2,2-trifluoro-N-phenylacetimidate (1b')

IR (Film): 3032, 1706 (s), 1597, 1489, 1453, 1308, 1205 (s), 1135 (s), 1073, 1026, 964, 912, 794, 692 (s)  $\text{cm}^{-1}$ ;  $^1\text{H NMR}$ : (500 MHz,  $\text{CDCl}_3$ )  $\delta$  7.55 - 7.31 (m, 5H), 7.31 - 7.12 (m, 12H), 7.11 - 7.07 (m, 1H), 6.88 - 6.65 (m, 2H), 6.37 (br. s., 1H), 4.76 (d,  $J=7.8$  Hz, 1H);  $^{13}\text{C NMR}$ : (125 MHz,  $\text{CDCl}_3$ )  $\delta$  144.20, 138.17, 136.91, 135.03, 132.34, 129.22, 129.06, 128.86, 128.53, 128.37, 128.19, 127.80, 127.77, 127.45, 124.10, 119.62, 81.36, 59.28; MS (ESI-APCI) exact mass calculated for  $[\text{M}-(\text{CCl}_3\text{C}=\text{NHO})]$  ( $\text{C}_{20}\text{H}_{17}\text{S}$ ) requires  $m/z$  289.1, found  $m/z$  289.1.

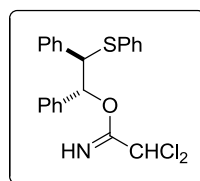

#### 1,2-diphenyl-2-(phenylthio)ethyl 2,2-dichloroacetimidate (1b'')

IR (Film): 3323, 3031, 2980, 1667 (s), 1583, 1479, 1453, 1337, 1216, 1072 (s), 987, 798, 746, 695 (s)  $\text{cm}^{-1}$ ;  $^1\text{H NMR}$ : (500 MHz,  $\text{CDCl}_3$ )  $\delta$  8.23 (s, 1H), 7.33 (dd,  $J=1.2, 8.1$  Hz, 2H), 7.29 - 7.06 (m, 13H), 6.27 (d,  $J=7.8$  Hz, 1H), 5.74 (s, 1H), 4.71 (d,  $J=8.3$  Hz, 1H);  $^{13}\text{C NMR}$ : (125 MHz,  $\text{CDCl}_3$ )  $\delta$  163.64, 137.70, 137.22, 135.26, 131.72, 128.96, 128.72, 128.53, 128.07, 127.85, 127.51, 127.23, 126.94, 81.76, 65.60,

58.66; MS (ESI-APCI) exact mass calculated for [M-(CCl<sub>3</sub>C=NHO)] (C<sub>20</sub>H<sub>17</sub>S) requires  $m/z$  289.1, found  $m/z$  289.1.

## 6. Data for kinetic analysis with in situ IR spectroscopy and derivation of the rate laws

### Kinetic analysis by in situ infrared spectroscopy

Representative procedure: An oven-dried two-necked reaction vessel equipped with a 1/8" long stir bar was charged with indole (23.4 mg, 0.20 mmol), thiourea **3** (6.3 mg, 10.0  $\mu$ mol) and molecular sieves (4 $\text{\AA}$ , beads, 50 mg). It was capped with a rubber septum, and anhydrous toluene (1.5 mL) was added to dissolve the reactants. The vessel was then attached to an in situ infrared (IR) spectroscopy probe that had been dried with a heat gun. An ice bath was applied to cool the reaction mixture down to 0  $^{\circ}$ C with stirring, and a background IR spectrum was collected (256 scans) after 5 min. Continuous data collection was started (4 spectra/min, 50 scans/spectrum) at 0  $^{\circ}$ C. A freshly prepared stock solution of **1a** (44.6 mg, 0.10 mmol) in toluene (0.5 mL) was added by syringe to the vessel. When the IR absorbance of the trichloroacetimidate C=N bond (height to two-point baseline, 1670  $\text{cm}^{-1}$  to 1698/1648  $\text{cm}^{-1}$ ) had become level (ca. 3 min). A freshly prepared stock solution of 4-NBSA (4  $\mu$ L of a solution of 101.6 mg 4-NBSA in 1 mL THF, 2.0  $\mu$ mol) was added to start the reaction. The reaction was monitored until the absorbance of **1a** at 1670  $\text{cm}^{-1}$  had become level or, in several cases when the reaction was slow ( $t_{1/2}$  > 10 hours), until the absorbance of **1a** had reached < 30% of its initial value.

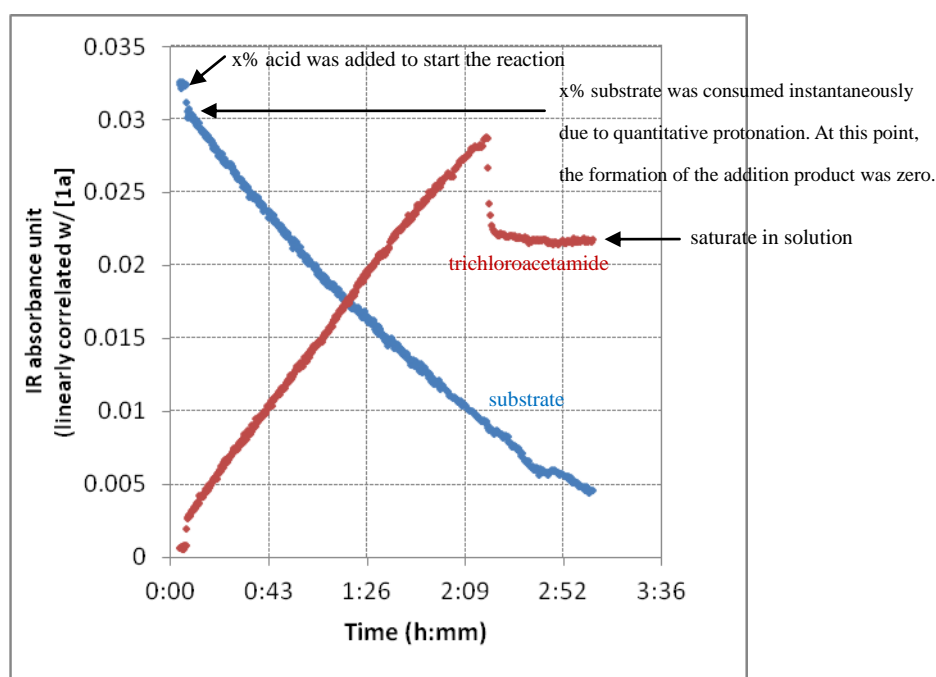

The trichloroacetamide (a by-product of the reaction) C=O bond appeared as a doublet peak (1745 and 1733  $\text{cm}^{-1}$ ) close to the monitored **1a** absorbance on all the spectrums collected after the reaction was started. Due to the partial solubility of trichloroacetamide in toluene at 0  $^{\circ}$ C, it usually reached saturation point (at ca. 50% conversion), went supersaturated, and finally precipitated from the solution and became leveled at the saturation point (usually at ca. 60-80% conversion, depending on the rate of the reaction). The resulted IR spectrum after this by-product precipitation could be relatively messy and the absorbance of the **1a** trichloroacetimidate peak could be influenced in some cases. In order to

obtain accurate data information, the reaction progress after precipitation of the amide by-product was disposed during data analysis.

After 4-NBSA was added to the reaction mixture, an immediate decrease of the monitored acetimidate absorbance and a concurrent increase of the amide by-product peak were observed, and the amount of decrease/increase, after converted to the concentration change by the beers law plot, is equivalent to the amount of acid added. This shows that after acid addition, **1a** is immediately quantitatively protonated and forms the epi-sulfonium ion and trichloroacetamide. If this step is prior to the rate limiting process (this is proved later by different access experiments, see data analysis below), at the point when x% **1a** was consumed (x% = the amount of 4-NBSA added), the formation of the desired addition product is about zero. Therefore, when data was analyzed, the first x% conversion of **1a** was not considered as part of the reaction progress, and the “0% conversion point” and “zero time point” was placed at  $[\mathbf{1a}] = (1-x\%) \cdot [\mathbf{1a}]_{\text{initial}}$ .

Data under steady state conditions (5–60% conversion) were used in the kinetic analysis. Acid-catalyzed addition reaction (i.e., racemic background reaction) does not contribute substantially to the overall reaction rate under thiourea-catalyzed conditions; the initial rate of the racemic background reaction is ~2% of the initial rate of the asymmetric reaction. The enantiomeric excess of the reaction under the standard in situ IR condition was 80-85%.

The figure below depicts a representative plot of [trichloroacetimidate (**1a**)] versus time. The red and blue data points are two independent ReactIR (RIR) reaction progress monitoring at the same condition (except that RIR run II also had added dibromomethane as NMR internal standard). The green and orange data points are <sup>1</sup>H NMR analysis of RIR run II by taking aliquots at certain time points to validate that the RIR data represents both consumption of starting material (SM) and accumulation of product **2a** (pdt) (the orange data points were applied to equation: conversion(M) =  $[\mathbf{1a}]_{\text{initial}} - \text{yield(M)}$ , so that it could overlay with the RIR data). Concentration versus time data were converted to rate versus concentration data by analytical differentiation of a seventh-order polynomial fit to the concentration versus time data using methods described in the following reference: Zuend, S. J. & Jacobsen E. N. *J. Am. Chem. Soc.* **129**, 15872–15883 (2007).

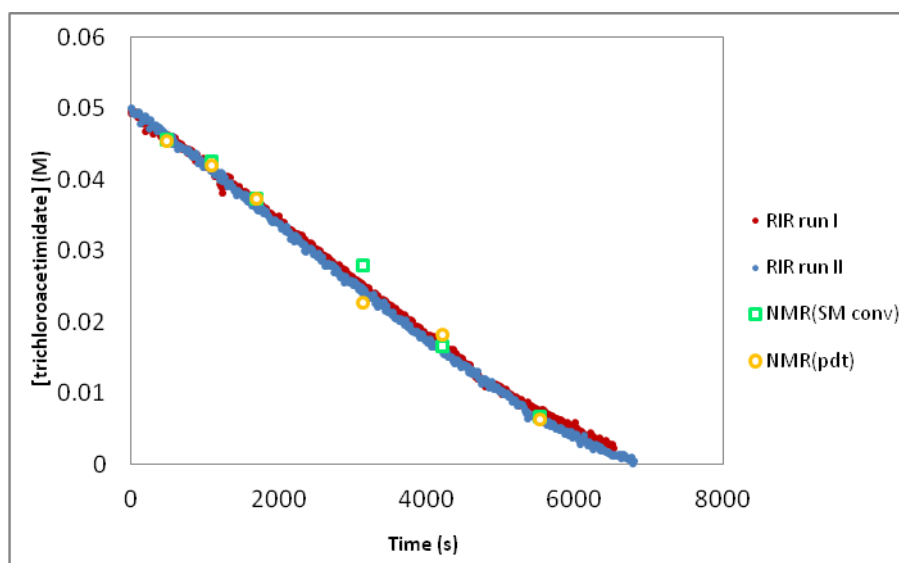

Rates of epi-sulfonium ring opening with indole catalyzed by 4-NBSA at different [**1a**], [indole] and [4-NBSA]. Rates are provided in  $\text{M s}^{-1}$  ( $\times 10^{-6}$ ).

Reaction condition: [**1a**]<sub>i</sub> = 0.050 M, [indole]<sub>i</sub> = 0.10 M.

| conversion of <b>1a</b> (%) | [ <b>1a</b> ] (M) | [indole] (M) | [4-NBSA] <sub>T</sub> = 2.5 mM | [4-NBSA] <sub>T</sub> = 5.0 mM | [4-NBSA] <sub>T</sub> = 7.5 mM | [4-NBSA] <sub>T</sub> = 10 mM |
|-----------------------------|-------------------|--------------|--------------------------------|--------------------------------|--------------------------------|-------------------------------|
| 10                          | 0.045             | 0.095        | 4.84                           | 7.24                           | 9.32                           | 12.6                          |
| 20                          | 0.040             | 0.090        | 4.53                           | 7.93                           | 9.29                           | 13.4                          |
| 30                          | 0.035             | 0.085        | 4.27                           | 8.11                           | 9.30                           | 13.6                          |
| 40                          | 0.030             | 0.080        | 4.04                           | 7.98                           | 9.26                           | 13.4                          |
| 50                          | 0.025             | 0.075        | 3.82                           | 7.96                           | 9.05                           | 13.2                          |
| 60                          | 0.020             | 0.070        | 3.54                           | 8.08                           | 8.67                           | 12.8                          |
| 70                          | 0.015             | 0.065        | 3.15                           | 7.86                           | 8.31                           | 12.5                          |

Reaction condition: [**1a**]<sub>i</sub> = 0.050 M, [4-NBSA]<sub>T</sub> = 0.0050 M.

| conversion of <b>1a</b> (%) | [ <b>1a</b> ] (M) | [indole] <sub>i</sub> = 0.050 M | [indole] <sub>i</sub> = 0.10 M | [indole] <sub>i</sub> = 0.20 M | [indole] <sub>i</sub> = 0.30 M |
|-----------------------------|-------------------|---------------------------------|--------------------------------|--------------------------------|--------------------------------|
| 10                          | 0.045             | 3.48                            | 6.65                           | 16.1                           | 26.1                           |
| 20                          | 0.040             | 3.19                            | 6.55                           | 17.8                           | 30.7                           |
| 30                          | 0.035             | 2.94                            | 6.30                           | 18.5                           | 33.7                           |
| 40                          | 0.030             | 2.70                            | 6.18                           | 18.7                           | 35.1                           |
| 50                          | 0.025             | 2.45                            | 6.13                           | 19.1                           | 36.1                           |
| 60                          | 0.020             | 2.18                            | 5.94                           | 19.9                           | 37.6                           |
| 70                          | 0.015             | 1.84                            | 5.49                           | 20.3                           | 39.5                           |

Reaction condition: [indole]<sub>i</sub> = 0.10 M, [4-NBSA]<sub>T</sub> = 0.0050 M.

| conversion of indole (%) | [indole] (M) | [ <b>1a</b> ] <sub>i</sub> = 0.050 M | [ <b>1a</b> ] <sub>i</sub> = 0.025 M |
|--------------------------|--------------|--------------------------------------|--------------------------------------|
| 5                        | 0.095        | 6.65                                 | 5.19                                 |
| 10                       | 0.090        | 6.55                                 | 5.20                                 |
| 15                       | 0.085        | 6.30                                 | 4.95                                 |
| 20                       | 0.080        | 6.18                                 |                                      |
| 25                       | 0.075        | 6.13                                 |                                      |
| 30                       | 0.070        | 5.94                                 |                                      |
| 35                       | 0.065        | 5.49                                 |                                      |

Reaction condition: [**1a**]<sub>i</sub> = 0.050 M, [indole]<sub>i</sub> = 0.10 M, [4-NBSA]<sub>T</sub> = 0.0050 M.

| conversion of <b>1a</b> (%) | [indole] (M) | [TCAA] <sub>i</sub> = 0 <sup>a</sup> | [TCAA] <sub>i</sub> = 0.010 M | [TCAA] <sub>i</sub> = ca. 0.025 M <sup>b</sup> |
|-----------------------------|--------------|--------------------------------------|-------------------------------|------------------------------------------------|
| 10                          | 0.045        | 6.68                                 | 8.67                          | 10.5                                           |
| 20                          | 0.040        | 7.21                                 | 8.91                          | 9.87                                           |
| 30                          | 0.035        | 7.36                                 | 9.04                          | 8.94                                           |
| 40                          | 0.030        | 7.14                                 | 8.76                          | 8.01                                           |
| 50                          | 0.025        | 6.82                                 | 8.09                          | 7.23                                           |

|    |       |      |      |      |
|----|-------|------|------|------|
| 60 | 0.020 | 6.66 | 7.09 | 6.55 |
| 70 | 0.015 | 6.58 | 6.01 | 5.79 |

<sup>a</sup> TCAA = trichloroacetamide.

<sup>b</sup> Pre-saturated with TCAA. The saturation concentration of TCAA in toluene at 0 °C is ca. 0.025 M.

Rates of epi-sulfonium opening with indole catalyzed by 4-NBSA and chiral thiourea **3e** at different [indole], [4-NBSA] and [**3e**]. Rates are provided in  $M s^{-1}$  ( $\times 10^{-5}$ ).

Reaction condition: [**1a**]<sub>i</sub> = 0.050 M, [indole]<sub>i</sub> = 0.10 M, [**3e**]<sub>T</sub> = 0.0050 M.

| conversion of <b>1a</b> (%) | [ <b>1a</b> ] (M) | [indole] (M) | [4-NBSA] <sub>T</sub> = 0.5 mM | [4-NBSA] <sub>T</sub> = 1.0 mM | [4-NBSA] <sub>T</sub> = 2.5 mM | [4-NBSA] <sub>T</sub> = 5.0 mM |
|-----------------------------|-------------------|--------------|--------------------------------|--------------------------------|--------------------------------|--------------------------------|
| 10                          | 0.045             | 0.095        | 2.79                           | 6.06                           |                                |                                |
| 20                          | 0.040             | 0.090        | 1.90                           | 4.50                           | 10.4                           | 19.4                           |
| 30                          | 0.035             | 0.085        | 1.20                           | 3.10                           | 8.20                           | 14.7                           |
| 40                          | 0.030             | 0.080        | 0.86                           | 2.13                           | 6.42                           | 10.8                           |
| 50                          | 0.025             | 0.075        | 0.72                           | 1.68                           | 4.76                           | 8.23                           |
| 60                          | 0.020             | 0.070        | 0.54                           | 1.42                           | 3.87                           | 6.72                           |
| 70                          | 0.015             | 0.065        | 0.45                           | 1.10                           | 3.40                           | 5.59                           |

Reaction condition: [**1a**]<sub>i</sub> = 0.050 M, [indole]<sub>i</sub> = 0.10 M, [4-NBSA]<sub>T</sub> = 0.0010 M.

| conversion of <b>1a</b> (%) | [ <b>1a</b> ] (M) | [indole] (M) | [ <b>3e</b> ] <sub>T</sub> = 0.5 mM | [ <b>3e</b> ] <sub>T</sub> = 1.0 mM | [ <b>3e</b> ] <sub>T</sub> = 2.5 mM | [ <b>3e</b> ] <sub>T</sub> = 5.0 mM |
|-----------------------------|-------------------|--------------|-------------------------------------|-------------------------------------|-------------------------------------|-------------------------------------|
| 10                          | 0.045             | 0.095        | 0.67                                | 1.13                                | 3.18                                | 6.06                                |
| 20                          | 0.040             | 0.090        | 0.41                                | 0.71                                | 2.16                                | 4.50                                |
| 30                          | 0.035             | 0.085        | 0.32                                | 0.55                                | 1.38                                | 3.10                                |
| 40                          | 0.030             | 0.080        | 0.26                                | 0.39                                | 1.00                                | 2.13                                |
| 50                          | 0.025             | 0.075        | 0.20                                | 0.32                                | 0.84                                | 1.68                                |
| 60                          | 0.020             | 0.070        |                                     |                                     | 0.62                                | 1.42                                |
| 70                          | 0.015             | 0.065        |                                     |                                     | 0.50                                | 1.10                                |

Reaction condition: [**1a**]<sub>i</sub> = 0.050 M, [4-NBSA]<sub>T</sub> = 0.0010 M, [**3e**]<sub>T</sub> = 0.0025 M.

| conversion of <b>1a</b> (%) | [ <b>1a</b> ] (M) | [indole] <sub>i</sub> = 0.050 M | [indole] <sub>i</sub> = 0.10 M | [indole] <sub>i</sub> = 0.15 M | [indole] <sub>i</sub> = 0.20 M |
|-----------------------------|-------------------|---------------------------------|--------------------------------|--------------------------------|--------------------------------|
| 10                          | 0.045             | 1.57                            | 3.18                           | 4.48                           | 5.96                           |
| 20                          | 0.040             | 0.97                            | 2.16                           | 3.03                           | 3.89                           |
| 30                          | 0.035             | 0.56                            | 1.38                           | 2.08                           | 2.66                           |
| 40                          | 0.030             | 0.41                            | 1.00                           | 1.66                           | 2.25                           |
| 50                          | 0.025             | 0.26                            | 0.84                           | 1.35                           | 1.91                           |
| 60                          | 0.020             | 0.16                            | 0.62                           | 1.06                           | 1.55                           |
| 70                          | 0.015             |                                 | 0.50                           | 9.23                           | 1.40                           |



Reaction condition:  $[\text{indole}]_i = 0.10 \text{ M}$ ,  $[\mathbf{3e}]_T = 0.0050 \text{ M}$ .

| conversion of indole (%) | [indole] (M) | [4-NBSA] <sub>T</sub> = 0.0010 M     |                                      | [4-NBSA] <sub>T</sub> = 0.0025 M     |                                      |
|--------------------------|--------------|--------------------------------------|--------------------------------------|--------------------------------------|--------------------------------------|
|                          |              | [ <b>1a</b> ] <sub>i</sub> = 0.050 M | [ <b>1a</b> ] <sub>i</sub> = 0.075 M | [ <b>1a</b> ] <sub>i</sub> = 0.050 M | [ <b>1a</b> ] <sub>i</sub> = 0.075 M |
| 5                        | 0.095        | 5.85                                 | 5.23                                 |                                      |                                      |
| 10                       | 0.090        | 4.29                                 | 3.50                                 |                                      |                                      |
| 15                       | 0.085        | 2.94                                 | 2.18                                 |                                      |                                      |
| 20                       | 0.080        | 2.05                                 | 1.63                                 | 6.81                                 | 6.15                                 |
| 25                       | 0.075        | 1.65                                 | 1.42                                 | 5.05                                 | 4.88                                 |
| 30                       | 0.070        | 1.40                                 | 1.08                                 | 3.95                                 | 3.76                                 |
| 35                       | 0.065        | 1.09                                 | 0.92                                 | 3.43                                 | 3.02                                 |

### Derivation of empirical rate law

Rate dependence on starting material **1a**: 0<sup>th</sup> order – formation of epi-sulfonium ion from **1a** is quantitative. This is based on:

- 1) Kinetic data by in situ IR study showed that the rate of the reaction is independent on the concentration of **1a** in both racemic and asymmetric conditions.
- 2) An inverse rate dependence on trichloroacetamide – a by-product generated during the decomposition of **1a** to form epi-sulfonium ion, was NOT observed.
- 3) Treatment of **1a'** with trichloroacetamide under acid-catalyzed condition did not furnish anion-metathesis product **1a** (see equation below).

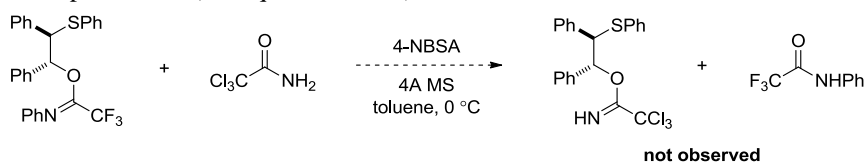

- 4) During in situ IR study, an immediate decrease of the monitored acetimidate absorbance and a concurrent increase of the amide by-product peak were observed after 4-NBSA was added to the reaction mixture. The amount of decrease/increase of absorbance, after converted to the concentration change by the beers law plot, is equivalent to the amount of acid added.

Rate dependence on indole: 1<sup>st</sup> order.

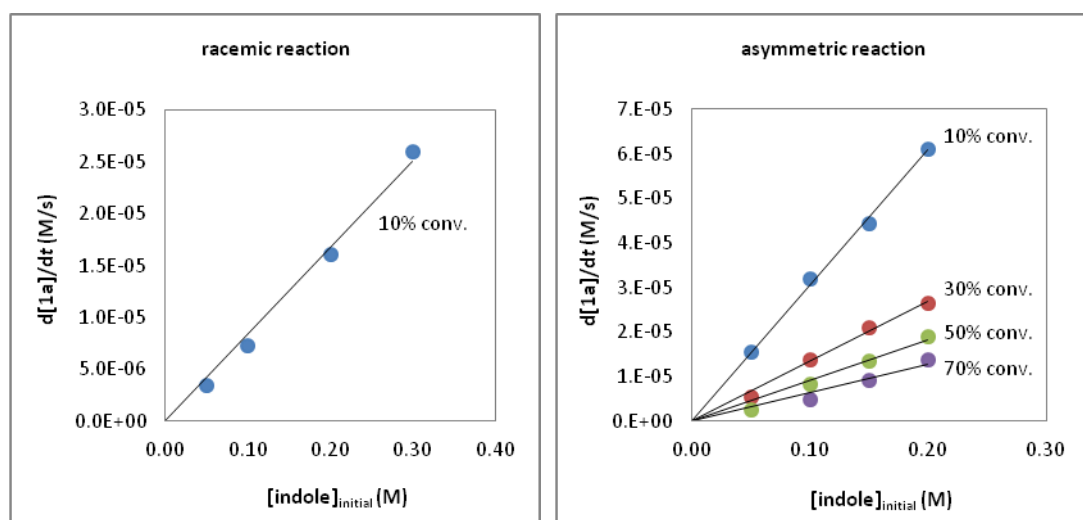

Rate dependence on acid and catalyst: 1<sup>st</sup> order.

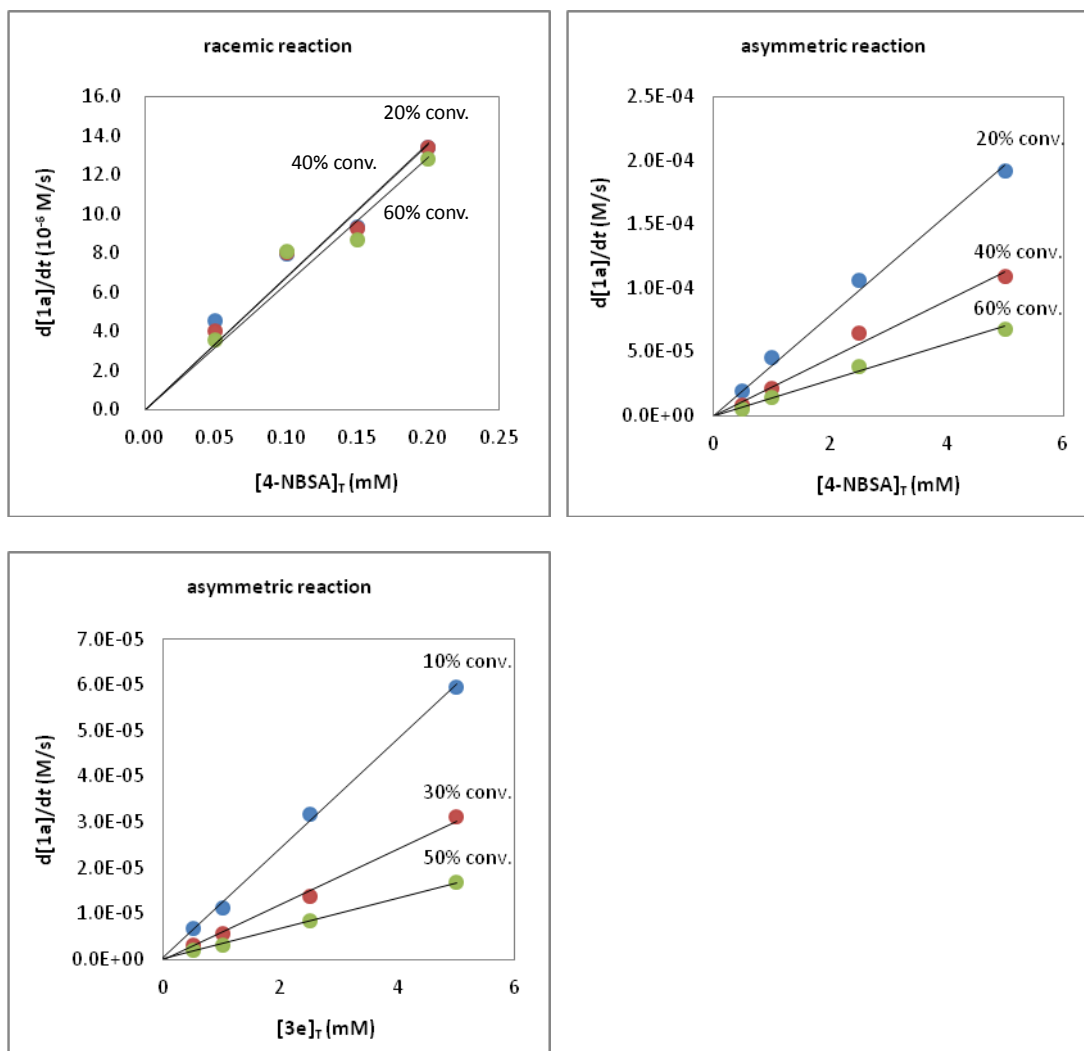

Empirical rate laws:

For racemic reaction (catalyzed by 4-NBSA only):

$$d[1a]/dt = k_{\text{rac}} [4-NBSA]_T [\text{indole}].$$

For asymmetric reaction (catalyzed by thiourea and 4-NBSA):

$$d[1a]/dt = k_{\text{asym,observed}} [4-NBSA]_T [3e]_T [\text{indole}].$$

## 7. Non-linear effect study

General information:

Non-linear effect study was conducted with a thiourea catalyst structurally analogous to **3e**, shown in the scheme below. This catalyst gives 85% ee under the model reaction condition (when **3e** provides 93% ee). The similar levels of stereo-induction and analogous structures led us to assume that the two catalysts induce selectivity in the same manner. The non-linear effect study was done at  $-40$  °C, a decreased temperature compared to the model condition in order to further exclude the effect of any background reaction. Otherwise, the procedure can refer to section 5.

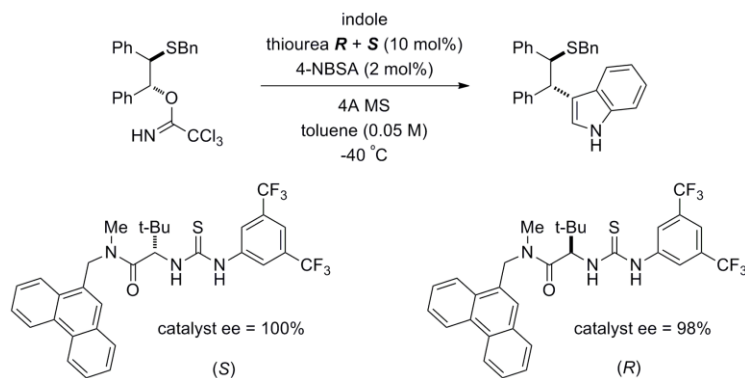

| cat ee% ( <i>R</i> ) <sup>a</sup> | pdt ee% <sup>b</sup> |
|-----------------------------------|----------------------|
| 0                                 | 0.67                 |
| 25                                | 23.63                |
| 50                                | 45.40                |
| 75                                | 66.14                |
| 100                               | 86.18                |

<sup>a</sup> The *R* and *S* catalysts are premixed with a ratio between 1:1 and 1:0, and the catalyst ee was calculated assuming that both enantiomeric catalysts have perfect ee (100%). <sup>b</sup> product ee was determined by HPLC, and the values presented are the average of the readouts at three different UV wavelength (210, 230 and 250 nm).

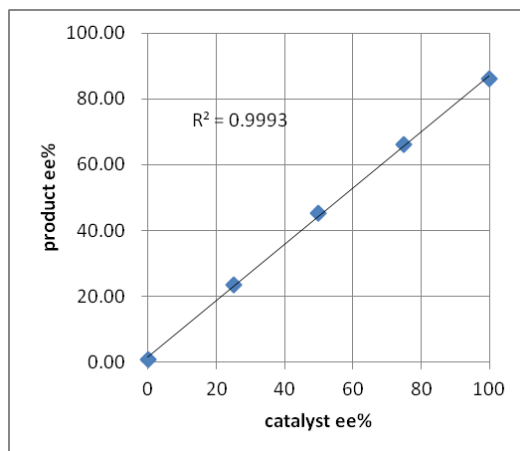

Conclusion: No non-linear effect was seen. This is consistent with the reaction transition state involving only one molecule of the thiourea catalyst.

## 8. Date for linear free energy relationship study with Mayr's reactivity parameters

General procedure for competition experiments:

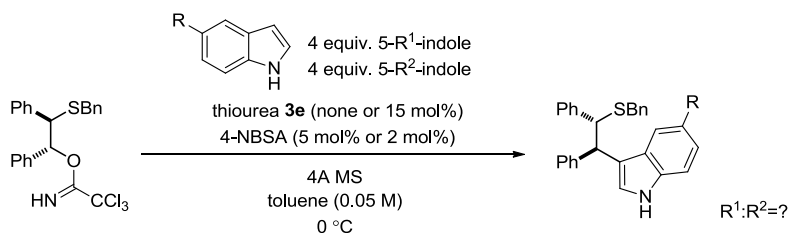

An oven-dried vial was charged with **1a** (11.6 mg, 0.025 mmol), thiourea catalyst (none for a racemic reaction or, 2.4 mg, 3.75 μmol of **3e** for an asymmetric reaction), nucleophile I (0.10 mmol, 4.0 equiv),

nucleophile II (0.10 mmol, 4.0 equiv) and 4Å molecular sieves (15 mg, powder, activated). The vial was cooled to  $-78\text{ }^{\circ}\text{C}$ , and toluene was added with stirring. The vial was then placed in a  $0\text{ }^{\circ}\text{C}$  ice bath until all the reactants and catalyst were fully dissolved. 4-NBSA (freshly prepared stock solution, 0.5 M in THF, 10  $\mu\text{L}$ , 5 mol% for a racemic reaction or, 4  $\mu\text{L}$ , 2 mol% for an asymmetric reaction) was added to the solution via syringe. The reaction mixture was stirred at  $0\text{ }^{\circ}\text{C}$  for 4 h, and then quenched at the same temperature by addition of  $\text{NEt}_3$  ( $\sim 10\text{ }\mu\text{L}$ ). The reaction was filtered through a short silica plug, and the plug was washed with small amounts of toluene and DCM sequentially. The combined organic solutions were concentrated under vacuum to yield the crude products mixture, which was dissolved in  $\text{CDCl}_3$ , and analyzed with  $^1\text{H}$  NMR spectroscopy (the two adjacent benzylic protons  $\alpha$  and  $\beta$  to the indole ring and the methylene protons in the benzylsulfanyl group were integrated, if well resolved from the rest of the NMR resonances). The relative rate constant  $k_{\text{rel}}$  for 5-substituted indoles are with respect to the rate constant of *H*-indole ( $k_{\text{rel}} = 1$ ). The absolute rate constant  $k$  ( $k_{\text{rac}}$  and  $k_{\text{asym}}$ ) for 5-R-indoles are calculated with the equation:  $k = k_{\text{rel}} \times k_{H\text{-indole}}$ , assuming that the kinetic profiles of substituted indoles are the same as *H*-indole.

General procedure for in situ IR study: Followed the procedure described in section 6. Rates of indole derivatives were measured independently, and the relative rate was calculated with reference to indole.

$N$  is the Mayr nucleophilicity parameter,  $s_N$  is the nucleophile-specific parameter, both obtained from the Mayr database of reactivity parameter:

<http://www.cup.uni-muenchen.de/oc/mayr/reaktionsdatenbank/>

Based on equation:  $\log(k) = s_E s_N (N+E)$ , a LFER is established between the logarithm of the rates of indole derivatives –  $\log(k_{\text{rac}})$ , and the Mayr nucleophilicity parameter –  $s_N N$  (equivalent to  $\log(k)$  of reactions between these indole derivatives and an electrophile with  $E = 0$ , e.g. dimethoxybenzhydrylium ion). For a reference describing the use of the equation, see: Phan, T. B., Breugst, M. & Mayr, H. *Angew. Chem., Int. Ed.* **45**, 3869-3874 (2006).

For the racemic background reaction:

| R   | $N$  | $s_N$ | $s_N N$ | $k_{\text{rel}} = k_{\text{R-indole}}/k_{\text{indole}}^a$ |       |       |         | $\log k_{\text{rel}}$ | $k_{\text{rel}}^b$<br>(RIR) |
|-----|------|-------|---------|------------------------------------------------------------|-------|-------|---------|-----------------------|-----------------------------|
|     |      |       |         | I                                                          | II    | III   | average |                       |                             |
| MeO | 6.22 | 1.12  | 6.97    | 1.97                                                       | 1.94  | 1.79  | 1.90    | 0.29                  | 1.92                        |
| Me  | 6.00 | 1.10  | 6.60    | 1.44                                                       | 1.32  | -     | 1.38    | 0.15                  | -                           |
| H   | 5.55 | 1.09  | 6.05    | 1                                                          | -     | -     | 1       | 0                     | 1                           |
| F   | -    | -     | -       | 0.505                                                      | 0.532 | 0.505 | 0.514   | -0.30                 | -                           |
| Cl  | 4.42 | 1.10  | 4.86    | 0.342                                                      | -     | -     | 0.342   | -0.47                 | -                           |
| Br  | 4.38 | 1.10  | 4.82    | 0.348                                                      | -     | -     | 0.348   | -0.46                 | -                           |

<sup>a</sup> Obtained from competition experiments.

<sup>b</sup> Obtained from independent in situ IR study, and standardized with  $k_{\text{rel,indole}} = 1$ .

This decent correlation ( $R^2 = 0.996$ ) between  $\log(k)$  and  $s_N N$  allowed us to calculate the electrophilicity parameter for the *S*-benzyl-1,2-diphenylepisulfonium ion. According to equation:  $\log(k) = s_E s_N (N+E)$ , the slope of the plot =  $s_E = 0.36$ . Given  $\log(k) = 2.1$  for indole ( $s_N N = 6.05$ ), one can figure out that the electrophilicity parameter  $E = -10.3$ .

For thiourea **5**-catalyzed asymmetric reaction:

| R   | N    | s <sub>N</sub> | s <sub>N</sub> N | k <sub>rel</sub> = k <sub>R-indole</sub> /k <sub>indole</sub> <sup>a</sup> |      |      |         | logk <sub>rel</sub> | k <sub>rel</sub> <sup>b</sup><br>(RIR) |
|-----|------|----------------|------------------|----------------------------------------------------------------------------|------|------|---------|---------------------|----------------------------------------|
|     |      |                |                  | I                                                                          | II   | III  | average |                     |                                        |
| MeO | 6.22 | 1.12           | 6.97             | 2.23                                                                       | 2.41 | 2.02 | 2.22    | 0.35                | 2.19                                   |
| Me  | 6.00 | 1.10           | 6.60             | 0.98                                                                       | 0.99 | -    | 0.98    | 0.003               | 0.83                                   |
| H   | 5.55 | 1.09           | 6.05             | 1                                                                          | -    | -    | 1       | 0                   | 1                                      |
| F   | -    | -              | -                | 1.01                                                                       | 1.04 | 0.94 | 1.00    | 0.008               | 1.16                                   |
| Cl  | 4.42 | 1.10           | 4.86             | 0.73                                                                       | -    | -    | 0.73    | -0.14               | -                                      |
| Br  | 4.38 | 1.10           | 4.82             | 0.66                                                                       | -    | -    | 0.66    | -0.18               | 0.70                                   |

<sup>a</sup> Obtained from competition experiments.

<sup>b</sup> Obtained from independent in situ IR study, and standardized with k<sub>rel,indole</sub> = 1.

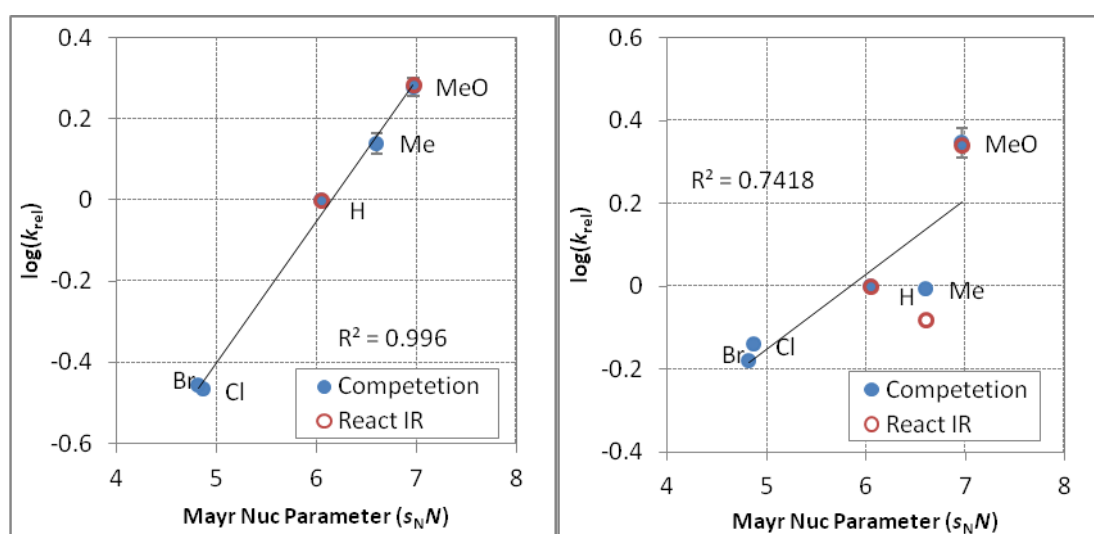

## 9. Data for kinetic isotope effect study

General information:

The KIE analysis was conducted using in situ IR spectroscopy with 1,3-*d*<sub>2</sub>-indole/1,3-*h*<sub>2</sub>-indole and a modified substrate **1e** bearing an *N*-phenyltrifluoroacetimidate leaving group (**1a'**). This was to avoid rapid H-D exchange at the 3-position of indole in the presence of other proton sources.

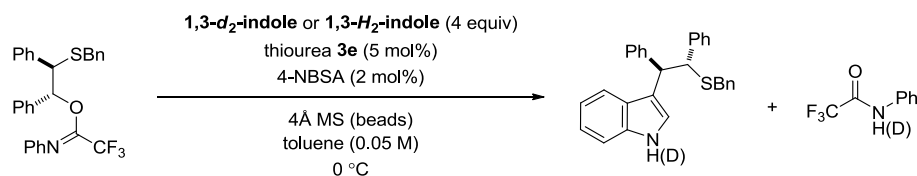

The KIE study was performed with in situ IR spectroscopy. 1,3-*d*<sub>2</sub>-indole was synthesized according to the procedure below, and the deuterium incorporation ratio were determined by <sup>1</sup>H NMR to be 96% (position 3) and >99% (position 1). A modified substrate **1a** with *N*-phenyltrifluoroacetimidate was used to avoid rapid isotope scrambling between the acidic protons on substrate **1a** and the deuterium at 3-position of 1,3-*d*<sub>2</sub>-indole catalyzed by Brønsted acid. It has been demonstrated that the acetimidate substrate undergoes quantitative protonation and decomposition to form epi-sulfonium 4-nitrobenzene-sulfonate, and thereby the structure of the leaving group does not affect the reaction kinetic profile. Therefore, the KIE of the modified **1a** can represent that of **1a** under the same condition. Although the

other proton sources (thiourea and 4-NBSA) were not precluded, a large excess of 1,3-*d*<sub>2</sub>-indole (4 equiv) and a relatively small amount of thiourea and acid (5 mol% and 2 mol%, respectively) were used to make sure the total isotopic concentration of exchangeable H was less than 3%.

Procedure of KIE study with in situ IR monitoring:

An oven-dried two-necked reaction vessel equipped with an 1/8" long stir bar was charged with indole (35.1 mg, 0.30 mmol) or 1,3-*d*<sub>2</sub>-indole (35.7 mg, 0.30 mmol) in a glove-box under dry nitrogen atmosphere (H<sub>2</sub>O < 0.1 ppm), and sealed with rubber septum. Thiourea **3e** (freshly prepared stock solution 0.015 M in toluene, 667 μL, 10.0 μmol), molecular sieves (4Å, beads, 40 mg, activated) and anhydrous toluene (433 μL) were transferred into the vessel quickly under air atmosphere and the vessel was purge with dry nitrogen several times before it was attached to an in situ infrared (IR) spectroscopy probe that had been dried with a heat gun. An ice bath was applied to cool the reaction mixture down to 0 °C with stirring for 5 min, and a background IR spectrum was collected (256 scans). Continuous data collection was started (4 spectra/min, 50 scans/spectrum). A freshly prepared stock solution of **1a'** (36.9 mg, 0.075 mmol) in toluene (0.4 mL) was added by syringe to the vessel. When the IR absorbance of the trichloroacetimidate C=N bond (height to baseline, 1713 cm<sup>-1</sup>) had become level. A freshly prepared stock solution of 4-NBSA (4 μL of a solution of 101.6 mg 4-NBSA in 1 mL THF, 2.0 μmol) was added to start the reaction. The reaction was monitored until the absorbance of **1a'** at 1670 cm<sup>-1</sup> had become level. Data was processed analogous to previously described in section 6.

Kinetic isotope effect data

Rates of independent KIE reactions catalyzed by 4-NBSA and chiral thiourea **3e**. Rates are provided in M s<sup>-1</sup> (x 10<sup>-5</sup>). Rate data become unreliable after 40% conversion due to peak overlap, and so only data from first 40% conversion are used here.

| conversion of <b>1a'</b> (%) | [ <b>1a'</b> ] (M) | 1,3- <i>H</i> <sub>2</sub> -indole |                      | 1,3- <i>d</i> <sub>2</sub> -indole (exp. I) |         | 1,3- <i>d</i> <sub>2</sub> -indole (exp. II) |         |
|------------------------------|--------------------|------------------------------------|----------------------|---------------------------------------------|---------|----------------------------------------------|---------|
|                              |                    | [ <b>1a'</b> ] <sup>a</sup>        | [amide] <sup>b</sup> | [ <b>1a'</b> ]                              | [amide] | [ <b>1a'</b> ]                               | [amide] |
| 15                           | 0.043              | 3.66                               | 3.84                 | 4.30                                        | 5.00    | 3.60                                         | 4.34    |
| 30                           | 0.035              | 2.51                               | 2.50                 | 3.05                                        | 3.59    | 2.43                                         | 2.82    |
| 40                           | 0.030              | 1.39                               | 1.30                 | 1.76                                        | 2.15    | 1.33                                         | 1.42    |

<sup>a</sup> based on the N=C IR peak in the substrate **1a'**.

<sup>b</sup> based on the O=C IR peak in the by-product *N*-phenyltrifluoroacetamide.

| conversion (%) | <i>r</i> <sub>H</sub> / <i>r</i> <sub>D</sub> |         |                |         |
|----------------|-----------------------------------------------|---------|----------------|---------|
|                | experiment I                                  |         | experiment II  |         |
|                | [ <b>1a'</b> ]                                | [amide] | [ <b>1a'</b> ] | [amide] |
| 15             | 0.85                                          | 0.76    | 1.02           | 0.88    |
| 30             | 0.82                                          | 0.70    | 1.03           | 0.89    |
| 40             | 0.80                                          | 0.60    | 1.05           | 0.91    |

KIE (*k*<sub>H</sub>/*k*<sub>D</sub>) = 0.93 ± 0.12 (based on [**1a'**]) or, KIE (*k*<sub>H</sub>/*k*<sub>D</sub>) = 0.86 ± 0.13 (based on both [**1a'**] and [amide]). (**an inverse secondary kinetic isotope effect**)

The statistical value indicates an inverse secondary KIE. This is in consistence with indole addition being the rds (sp<sup>2</sup> to sp<sup>3</sup>). However, since the error bar for this type of in situ IR analysis is usually about 10-15%, the saying that no primary KIE was observed would be a more rigorous conclusion.

Discussion about the rate-limiting step of thiourea-catalyzed epi-sulfonium ion opening with indole

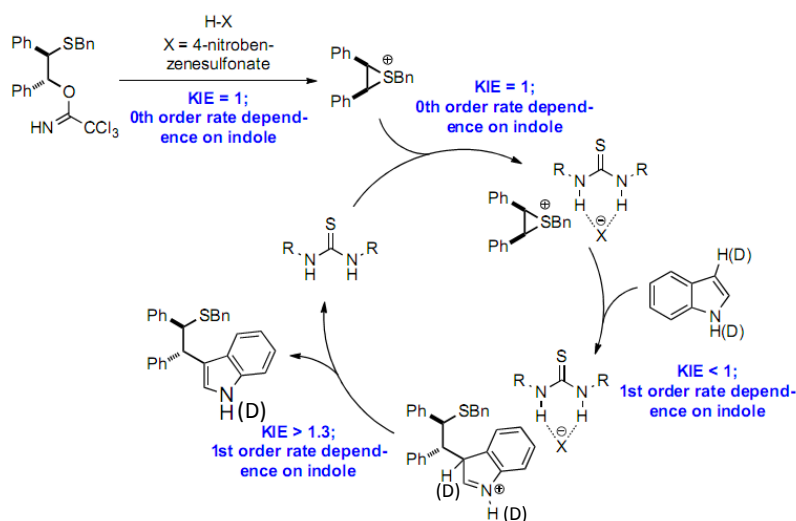

As shown in the scheme above, the 1st order rate dependence on indole (see section 6) has suggested that the rate limiting step for the reaction is either nucleophilic ring opening or re-aromatization. The  $pK_a$ -corrected Mayr analysis (see section 13) supports the indole addition (ring opening) being the rds. A KIE study would be able to further verify this assumption if the absence of a primary KIE was observed at 3 position of indole.

If ring opening is the rds, besides the bond formation event in the indole addition to epi-sulfonium ion, another factor that can contribute to the KIE value is any interaction involving indole N-H(D) bond in the rate-limiting step. If indole N-H is broken during the rate-limiting step, a primary KIE ( $> 1.3$ ) should be observed; otherwise, a non-primary KIE should be observed ( $\sim 1.0$ ). In either case, if re-aromatization is rate-determining, meaning that the C-H(D) at position 3 is broken during this event, an overall primary KIE ( $> 1.3$ ) should be obtained. The absence of this observation excludes the possibility of re-aromatization being the rate-limiting step, and supports the indole nucleophilic addition being the rate-limiting step when taken together with other experimental results discussed in the previous paragraph.

#### Synthesis of *N*-phenyltrifluoroacetimidate:

To a solution of 2-(benzylthio)-1,2-diphenylethanol (300 mg, 0.94 mmol, see section 5 for synthesis) and 2,2,2-trifluoro-*N*-phenylacetimidoyl chloride (216 mg, 169  $\mu$ L, 1.0 mmol) in DCM (5.0 mL) at 0  $^{\circ}$ C was added sodium hydride (60% suspension in mineral oil, 41.6 mg, 1.0 mmol). The mixture was stirred at room temperature for 2 h. Water and ethyl acetate were added to quench and dilute the reaction mixture. The aqueous layer was separated and extracted with EtOAc. The combined organic layers were washed with brine, dried over  $\text{Na}_2\text{SO}_4$ , concentrated and applied to flash column chromatography to obtain the product as a pale yellow gel ( $>90\%$  yield). Characterization data are shown in section 5.

#### Synthesis of 1,3- $d_2$ -indole:

The mixture of indole (585 mg, 5 mmol) and  $d_2$ -sulfuric acid ( $\text{D}_2\text{SO}_4$ , 0.001 M in  $\text{D}_2\text{O}$ , 1 mL) was refluxed under nitrogen atmosphere for 48 h. The reaction was then cooled to room temperature, and extracted with anhydrous EtOAc (dried over 4 $\text{\AA}$  MS overnight). The extract was washed with  $\text{D}_2\text{O}$

twice, dried over  $\text{Na}_2\text{SO}_4$ , concentrated and applied to flash column chromatography to yield 3-*d*-indole as white crystals. ( $^1\text{H}$  NMR showed partial incorporation of deuterium into the 2 position of indole under this relatively harsh condition.)

The obtained 3-*d*-indole was then dissolved in  $d_4$ -methanol ( $\text{CD}_3\text{OD}$ , 1 mL) and stirred under nitrogen atmosphere for 1 h. The solvent was then removed under vacuum, and the resulting solid was re-dissolved in  $d_4$ -methanol ( $\text{CD}_3\text{OD}$ , 1 mL) and stirred overnight under nitrogen atmosphere. The solvent was removed under vacuum to yield the desired 1,3- $d_2$ -indole as white/pale pink crystals. The isotope incorporation ratio of the product was determined by  $^1\text{H}$  NMR (in  $d_8$ -toluene) to be 96% (position 3), 54% (position 2) and >99% (position 1).

### 1,3- $d_2$ -indole:

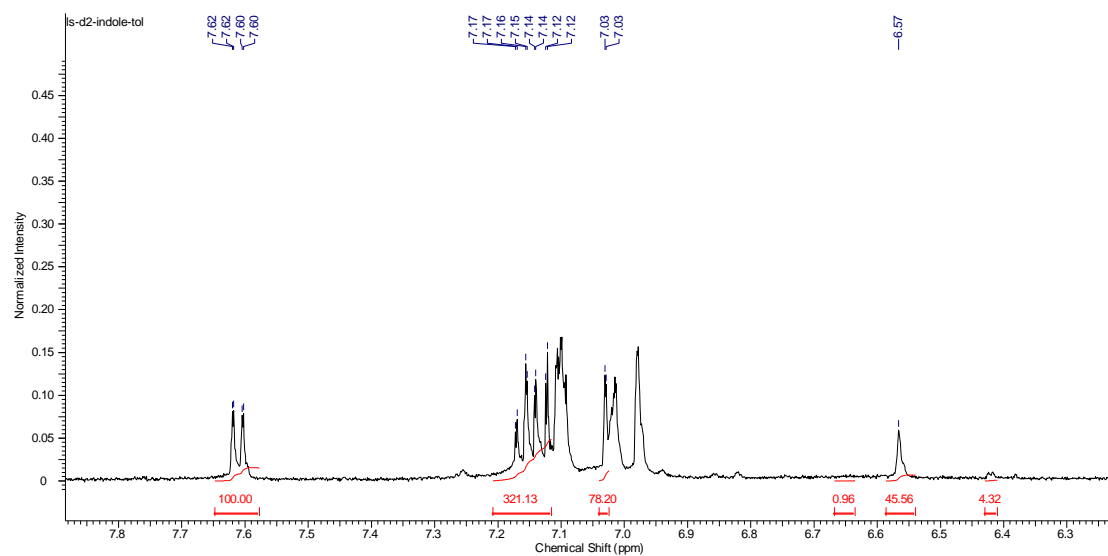

### indole:

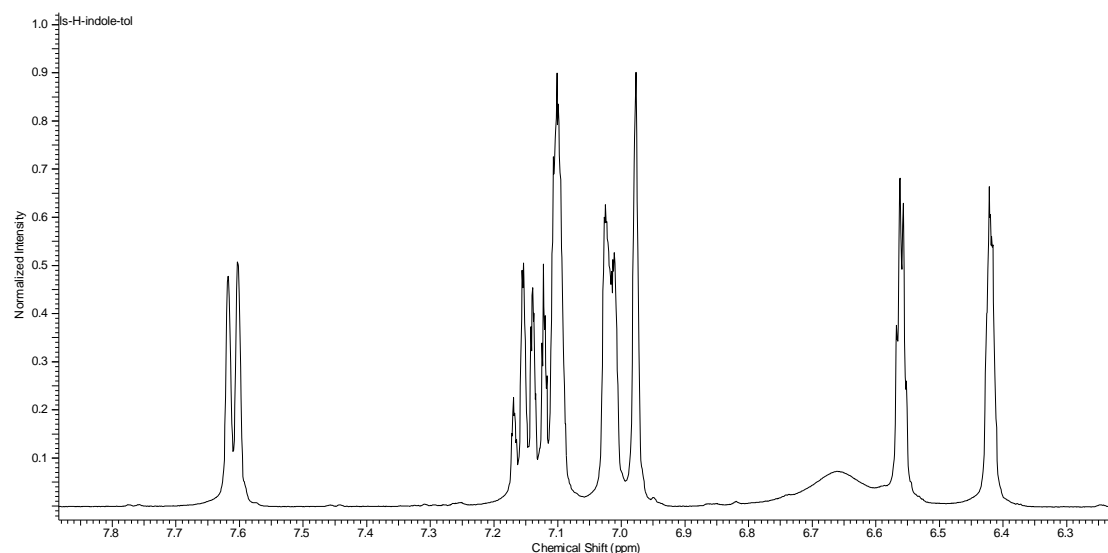



## 10. Data sets for Eyring analysis

Procedure: An oven-dried vial was charged with **1a** (0.025 mmol, 1.0 equiv), thiourea catalyst (0.0025 mmol, 0.10 equiv), indole (0.05 mmol, 2.0 equiv) and 4Å molecular sieves (15 mg, powder, activated). The flask was cooled to -30 °C, and toluene was added with stirring. Once the reactants and catalyst were fully dissolved, the mixture was cooled to the desired temperature (-30 to -75 °C), and 4-NBSA (0.5 M in THF, 0.00125 mmol, 0.05 equiv) was added directly into the solution via a 10 µL syringe. The reaction mixture was stirred at that temperature until TLC showed full conversion of the starting material, and then quenched at the same temperature by addition of NEt<sub>3</sub> (~10 µL). The resulting mixture was applied directly to a pipette column containing 4-5 cm of silica gel, and product was isolated by eluting hexanes/EtOAc (20:1 to 10:1) and solvent removal under reduced pressure. The enantiomeric excess was determined by chiral HPLC analysis (ChiralPak AD-H, 10% *i*-PrOH, 1 ml/min, *t*<sub>1</sub> = 24 min, *t*<sub>2</sub> = 33 min). The differential activation parameters were calculated using the following relationship:

$$\ln(er) = -\Delta\Delta H^\ddagger/RT + \Delta\Delta S^\ddagger/RT \text{ (where } R = 1.986 \text{ cal/mol}\cdot\text{K)}$$

| catalyst  | ee (%)              |         |         |         |         | $\Delta\Delta H^\ddagger$<br>(kcal/mol) | $\Delta\Delta S^\ddagger$<br>(eu) | calc. ee (%)<br>at 0 °C |
|-----------|---------------------|---------|---------|---------|---------|-----------------------------------------|-----------------------------------|-------------------------|
|           | (temperature ( °C)) |         |         |         |         |                                         |                                   |                         |
| <b>3e</b> | 91.8                | 93.0    | 93.5    | 95.1    | 95.7    | -1.57 ± 0.19                            | -0.18 ± 0.85                      | 88.6                    |
|           | (-30.0)             | (-40.7) | (-48.9) | (-58.4) | (-72.1) |                                         |                                   |                         |
| <b>3f</b> | 89.1                | 90.5    | 91.1    | 92.6    | 93.7    | -1.33 ± 0.09                            | 0.22 ± 0.40                       | 85.6                    |
|           | (-30.0)             | (-41.5) | (-50.0) | (-58.8) | (-72.3) |                                         |                                   |                         |
| <b>3g</b> | 86.4                | 88.3    | 89.6    | 89.9    | 91.6    | -1.08 ± 0.11                            | 0.82 ± 0.49                       | 83.4                    |
|           | (-30.0)             | (-41.8) | (-50.0) | (-58.7) | (-73.7) |                                         |                                   |                         |
| <b>3d</b> | 83.5                | 85.0    | n.d.    | 87.7    | 89.1    | -1.08 ± 0.03                            | 0.33 ± 0.11                       | 79.3                    |
|           | (-30.0)             | (-41.6) |         | (-59.7) | (-79.5) |                                         |                                   |                         |
| <b>3c</b> | 83.4                | 85.0    | 86.4    | 88.3    | 89.9    | -1.23 ± 0.06                            | -0.28 ± 0.29                      | 78.6                    |
|           | (-30.0)             | (-40.4) | (-50.0) | (59.0)  | (-73.2) |                                         |                                   |                         |
| <b>3b</b> | 71.8                | 75.1    | 77.1    | 77.3    | 80.3    | -0.84 ± 0.11                            | 0.19 ± 0.50                       | 67.8                    |
|           | (-30.0)             | (-41.2) | (-50.5) | (-58.5) | (-73.8) |                                         |                                   |                         |
| <b>3a</b> | 11.7                | 11.0    | n.d.    | 9.7     | n.d.    | 0.14 ± 0.41                             | 1.03 ± 1.81                       | 13.2                    |
|           | (-30.3)             | (-41.7) |         | (-59.6) |         |                                         |                                   |                         |

The differential activation parameters ( $\Delta\Delta H^\ddagger$ ) revealed that the enantioselectivity of the reaction was enthalpically controlled and that the magnitude of the differential enthalpy increased markedly as the catalyst arene increased in size. These data are consistent with that an attractive interaction between the aryl substituents on the thiourea derivatives and the cationic transition state, likely being cation- $\pi$  interaction, contributes to the stereoselection.

## 11. Data kinetic analysis of reactions catalyzed by thiourea 3a-3g

General information: Following the same procedure as described in section 6, reactions with thiourea **3a-3g** were analyzed with in situ IR spectroscopy. Plotting  $\ln(r_{\text{asym,observed}})$  vs.  $\ln(\text{er})$  of catalysts **3-7** at different fractional conversion (10-60%) of reaction provided a set of nearly parallel linear correlations. This suggests that the series of catalysts follow the same rate law.

Upon gaining the raw rate data, the rate constants of the pathways in the asymmetric reaction leading to the major and minor enantiomeric products ( $k_{\text{asym,major}}$  and  $k_{\text{asym,minor}}$ , respectively) are derived from the empirical rate laws and the equations below:

$$(1) r_{\text{asym,observed}} = r_{\text{asym}} + r_{\text{rac}} = (r_{\text{asym,major}} + r_{\text{asym,minor}}) + r_{\text{rac}}; \text{ and,}$$

$$(2) r_{\text{asym,major}}/r_{\text{asym,minor}} = \text{er.}$$

Rates measured directly with in situ IR are provided in the table below, in  $\text{M s}^{-1}$  ( $\times 10^{-5}$ ). Data for thiourea **3e**-catalyzed reaction and the racemic reaction are shown in section 6, and therefore not presented in the section.

Reaction condition:  $[\mathbf{1a}]_i = 0.050 \text{ M}$ ,  $[\text{indole}]_i = 0.1 \text{ M}$ ,  $[\text{4-NBSA}]_T = 0.0010 \text{ M}$ ,  $[\text{thiourea}]_T = 0.0050 \text{ M}$ .

| conv. of <b>1a</b> | [ <b>1a</b> ] (M) | <b>3a</b> I | <b>3a</b> II | <b>3b</b> I | <b>3b</b> II | <b>3c</b> I | <b>3c</b> II | <b>3d</b> I | <b>3d</b> II | <b>3g</b> I | <b>3g</b> II | <b>3f</b> I | <b>3f</b> II |
|--------------------|-------------------|-------------|--------------|-------------|--------------|-------------|--------------|-------------|--------------|-------------|--------------|-------------|--------------|
| 10%                | 0.045             | 0.56        | 0.55         | 1.16        | 1.08         | 2.23        | 2.41         | 2.31        | 2.92         | 2.31        | 2.42         | 4.75        | 5.68         |
| 20%                | 0.040             | 0.36        | 0.28         | 0.73        | 0.68         | 1.49        | 1.57         | 1.64        | 1.89         | 1.53        | 1.50         | 3.22        | 3.85         |
| 30%                | 0.035             | 0.22        | 0.15         | 0.39        | 0.34         | 0.85        | 0.92         | 1.00        | 1.16         | 0.97        | 0.96         | 2.09        | 2.49         |
| 40%                | 0.030             | 0.14        | 0.09         | 0.26        | 0.22         | 0.56        | 0.62         | 0.73        | 0.85         | 0.73        | 0.78         | 1.53        | 1.87         |
| 50%                | 0.025             | 0.09        | 0.08         | 0.18        | 0.15         | 0.42        | 0.46         | 0.55        | 0.63         | 0.59        | 0.57         | 1.33        | 1.54         |
| 60%                | 0.020             | 0.03        |              | 0.17        |              | 0.29        | 0.39         | 0.44        | 0.51         | 0.49        | 0.45         | 1.01        | 1.26         |

The following rate data are based on initial rates taken at 10% conversion of **1a**, and calculated with the equations shown above in this section.

| thiourea                                                  | <b>3a</b>       | <b>3b</b>       | <b>3c</b>       | <b>3d</b>       | <b>3g</b>       | <b>3f</b>       | <b>3e<sup>b</sup></b> |
|-----------------------------------------------------------|-----------------|-----------------|-----------------|-----------------|-----------------|-----------------|-----------------------|
| $r_{\text{asym,observed}}$ ( $10^{-5} \text{ M s}^{-1}$ ) | $0.56 \pm 0.01$ | $1.12 \pm 0.06$ | $2.32 \pm 0.10$ | $2.62 \pm 0.43$ | $2.36 \pm 0.06$ | $5.22 \pm 0.66$ | $6.08 \pm 0.36$       |
| $r_{\text{rac}}$ ( $10^{-6} \text{ M s}^{-1}$ )           | $1.40 \pm 1.4$  |                 |                 |                 |                 |                 |                       |
| $\ln(k_{\text{asym,major}})$                              | $1.55 \pm 0.03$ | $2.79 \pm 0.07$ | $3.67 \pm 0.05$ | $3.79 \pm 0.17$ | $3.71 \pm 0.03$ | $4.54 \pm 0.13$ | $4.72 \pm 0.09$       |
| $\ln(k_{\text{asym,minor}})$                              | $1.28 \pm 0.03$ | $1.16 \pm 0.07$ | $1.54 \pm 0.05$ | $1.63 \pm 0.17$ | $1.34 \pm 0.03$ | $1.99 \pm 0.13$ | $1.91 \pm 0.09$       |
| $\ln(\text{er})^a$                                        | 0.27            | 1.65            | 2.12            | 2.16            | 2.40            | 2.55            | 2.81                  |

<sup>a</sup> Enantiomeric ratio data at 0 °C were calculated based on the Eyring analysis in section 9. The direct experimental measurement of reaction ee at 0 °C does not provide accurate data for the intrinsic enantioselectivity of the catalysts due to the competing racemic background reaction at this temperature. <sup>b</sup> Rate data for catalyst **3e** was calculated on the basis of over 6 reactions under the standard in situ IR condition, most of which are presented in section 6.

## 12. Correlations of arene properties with rate and enantioselectivity for catalysts 3b-3g

The rate and enantioselectivity data were obtained in the same manner as in section 10. The ee's at 0 °C were calculated on the basis of the Eyring plots (section 9). The rates were measured by in situ IR

spectroscopy. Quadrupole moments of different arenes were obtained from: Ng, K. M., Ma, N. L. & Tsang, C. W. *Rapid Commun. Mass Spectrom.* **12**, 1679–1684 (1998). Polarizabilities of different arenes were obtained from: Waite, J., Papadopoulos, M. G. & Nicolaidis, C. A. *J. Chem. Phys.* **77**, 2536–2539 (1982), and the website of theoretical spectral database of polycyclic aromatic hydrocarbons (<http://astrochemistry.ca.astro.it/database/pahs.html>).

| arene        | polarizability | quadrupole moment | catalyst                  | $\ln(k_{\text{asym,major}})$ | $\ln(\epsilon_r)$ |
|--------------|----------------|-------------------|---------------------------|------------------------------|-------------------|
| benzene      | 61.9           | -6.29             | <b>3b</b> (phenyl)        | 2.79                         | 1.64              |
| naphthalene  | 115.5          | -9.77             | <b>3c</b> (1-naphthyl)    | 3.67                         | 2.12              |
| phenanthrene | 173.2          | -13.30            | <b>3e</b> (9-phenanthryl) | 4.72                         | 2.81              |
| pyrene       | 205.7          | -14.69            | <b>3f</b> (4-pyrenyl)     | 4.54                         | 2.55              |
| chrysene     | 239.0          | -16.96            | <b>3g</b> (6-chrysenyl)   | 3.71                         | 2.37              |

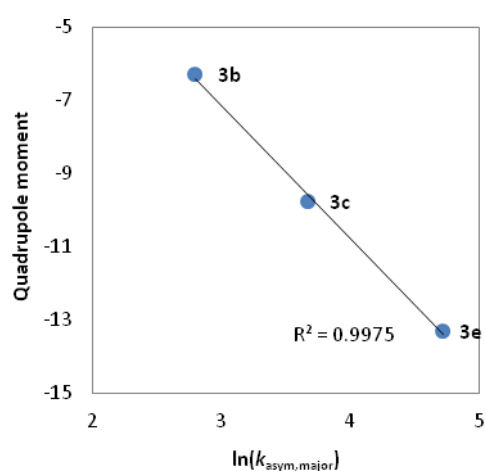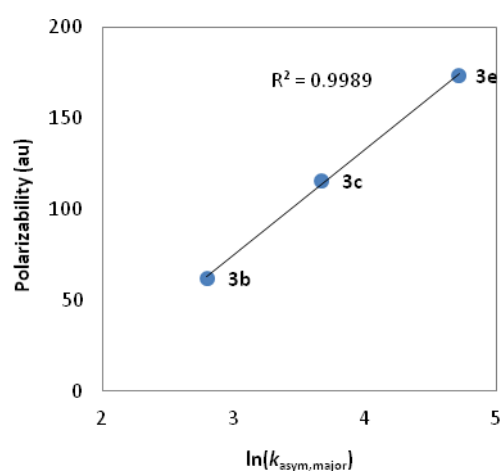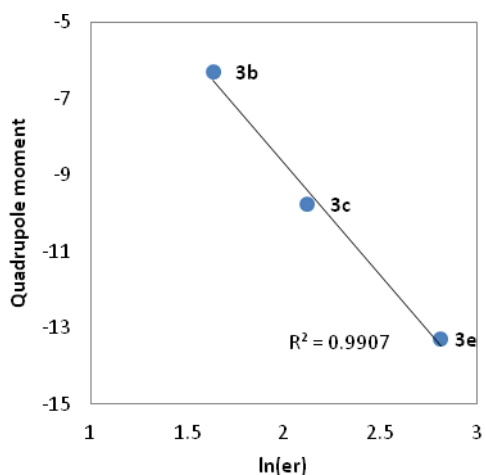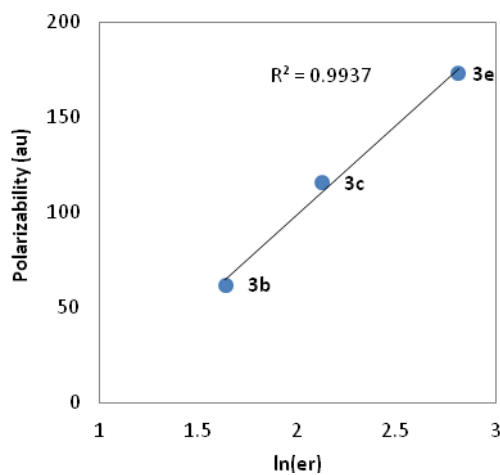

Note: Pyrenyl catalyst **3f** and chrysenyl catalyst **3g** can't fit into these correlations. An explanation has been provided in the main text. However, we can't fully understand this completely on this stage.

### 13. NMR binding study of thiourea **3e/3a** and dibenzylmethylsulfonium triflate

General information: Attempts to isolate or observe the episulfonium salt were unsuccessful requiring the investigation of an analogous sulfonium triflate salt. Under the model reaction condition, the combination triflic acid (HOTf) and **3e** provided **2a** in 71% yield and 73% ee.

General procedure: An oven-dried vial was charged with thiourea **3e** (3.2 mg, 5.0  $\mu\text{mol}$ ), dibenzylmethylsulfonium triflate (4.0 mg, excess), and anhydrous  $d_8$ -toluene (0.5 mL). The suspension was placed in an ultrasound sonicator for 2-3 min. The mixture was filtered through a short plug with cotton to remove the insoluble white solid after sonication, and the cotton was washed with a small amount of  $d_8$ -toluene. The final concentration of the thiourea-sulfonium salt solution is ca. 0.0010 M. The composition of the complex is 1.05:1 (thiourea : sulfonium triflate) by  $^1\text{H}$  NMR analysis. The chemical shift of the diagnostic resonances are shown below (toluene  $-\text{CH}_3$   $\delta = 2.09$  as reference).

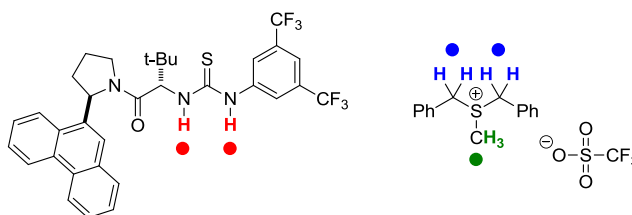

|                                   | thiourea N-H (ppm)<br>(red dots) | benzyl protons (ppm)<br>(blue dots) | methyl protons (ppm)<br>(green dots) |
|-----------------------------------|----------------------------------|-------------------------------------|--------------------------------------|
| thiourea <b>3e</b>                | 8.68, 7.25                       | -                                   | -                                    |
| dibenzylmethyl sulfonium triflate | -                                | 4.80, 4.59                          | 2.09                                 |
| 1:1 complex                       | 9.92, 7.68                       | 4.18, 4.03, 3.78                    | 1.31                                 |

For the synthesis of dibenzylsulfonium triflate salt, see: Miyatake, K., Yamamoto, K., Endo, K. & Tsuchida, E. *J. Org. Chem.* **63**, 7522–7524 (1998).

(See below for the NMR spectrum, displayed on the same scale of chemical shift 0-11 ppm)

Thiourea **3e**-sulfonium triflate complex:

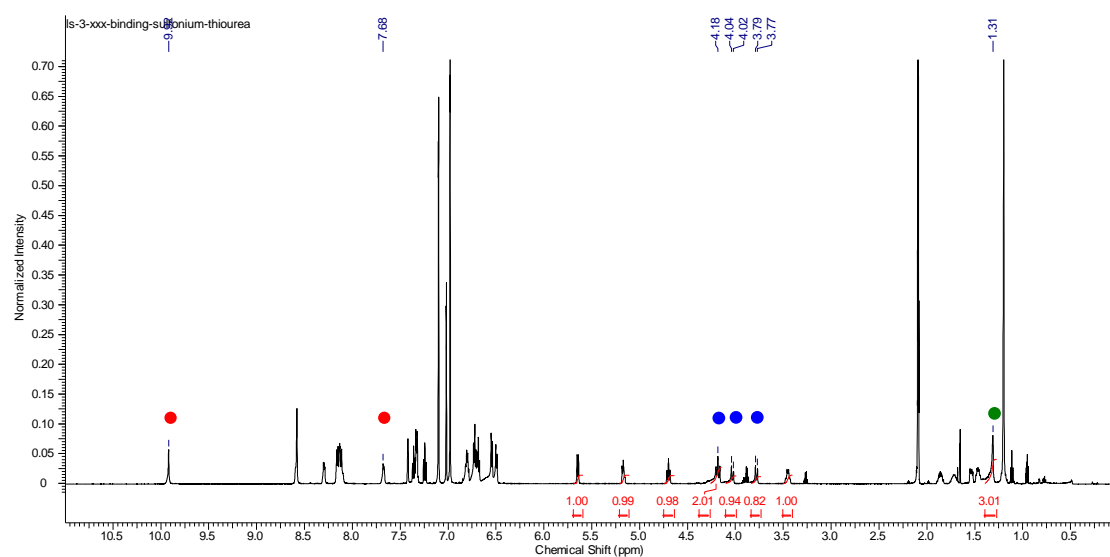

### Thiourea **3e**:

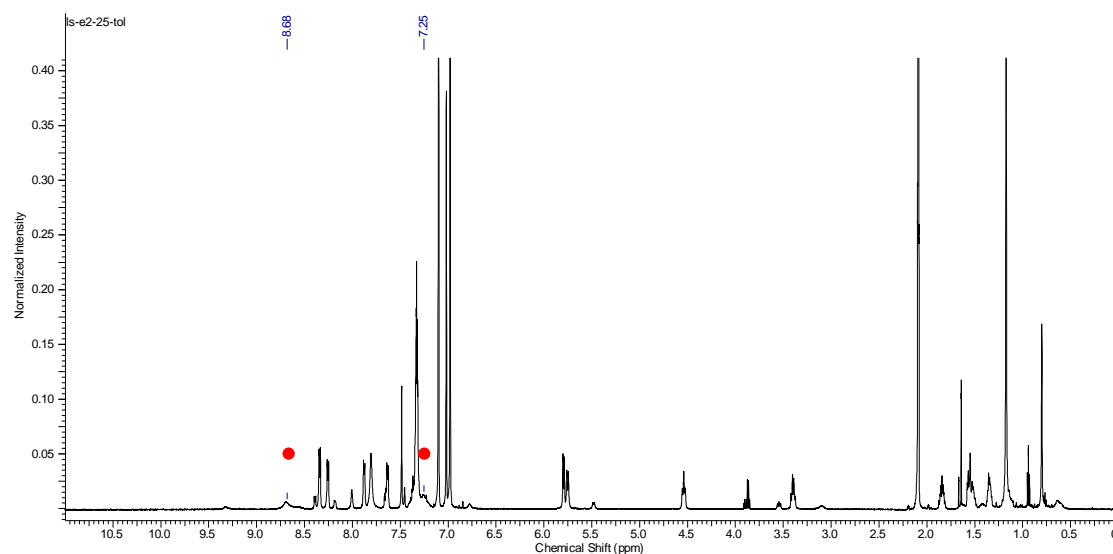

### Dibenzylmethylsulfonium triflate:

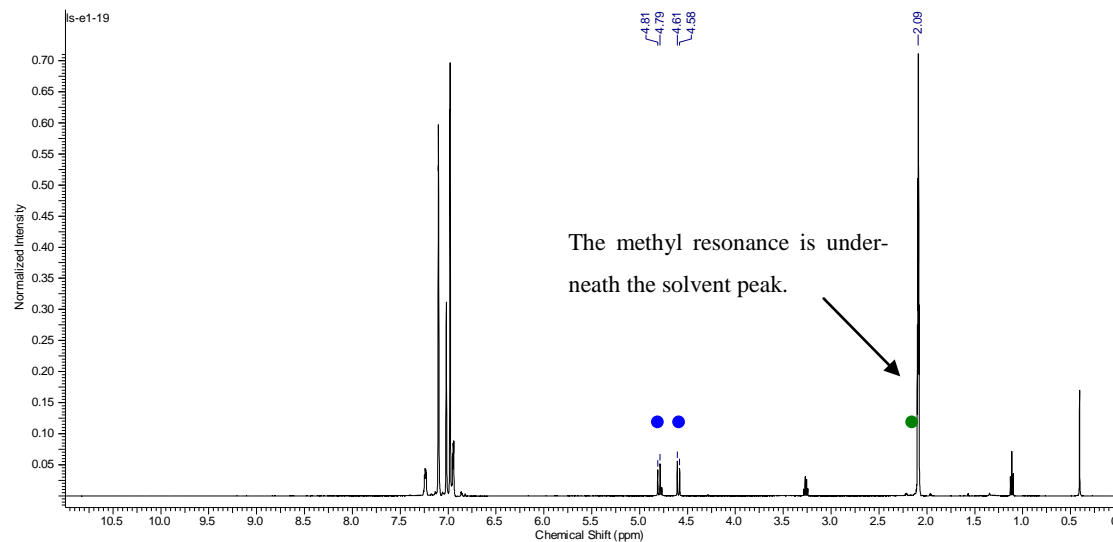

### Thiourea **3a**-sulfonium triflate complex:

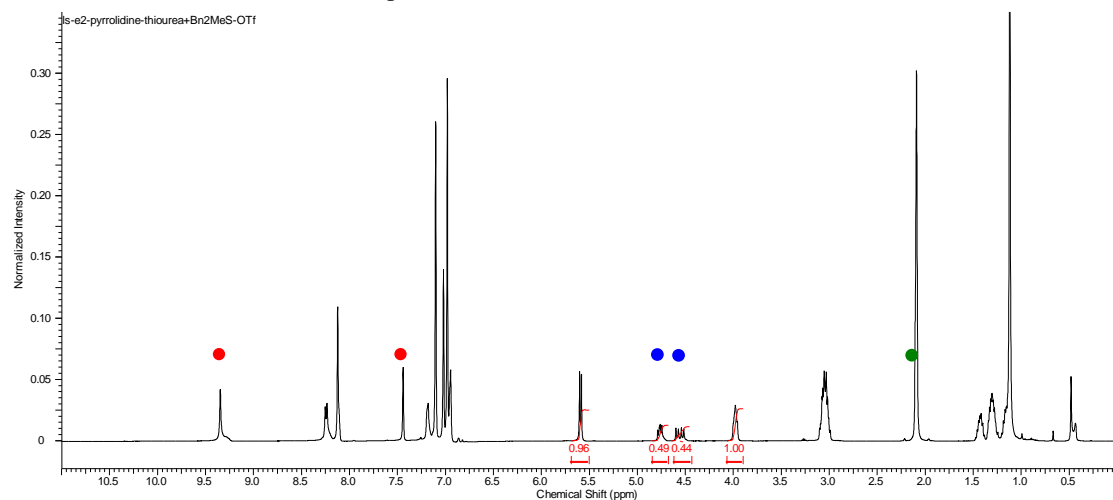

#### 14. Correlation of indole N-H acidity with the reaction rate, and structure-reactivity, and -selectivity relationship of $\pi$ -nucleophiles

General information: The  $pK_a$  values of indole derivatives used in the structure-reactivity analysis were calculated by Advanced Chemistry Development, Inc. (ACD/Labs) Software V12.01. The absolute or relative values of these calculated numbers were validated by literature reports, DFT calculations, experimental  $pK_a$  measurements via the Bordwell method, and Hammett analysis (see table below). For a reference evaluating the accuracy of  $pK_a$  calculation by ACD labs, see: Meloun, M. & Bordovská S. *Anal. Bioanal. Chem.* **389**, 1267-1281 (2007).

Indoles  $pK_a$ , inductive Hammett constant, calculated hydrogen bond energy involving indole N-H bond

| R   | $k_{\text{asym}}/k_{\text{rac}}^a$<br>( $10^3$ ) | $pK_a$               |                     |                              |                              | $\sigma_1^e$ | calc. H-bond energy<br>(kcal/mol) <sup>f</sup> |                        |
|-----|--------------------------------------------------|----------------------|---------------------|------------------------------|------------------------------|--------------|------------------------------------------------|------------------------|
|     |                                                  | calc. by ACD<br>labs | exp. In<br>$H_2O^b$ | exp. In<br>DMSO <sup>c</sup> | exp. In<br>DMSO <sup>d</sup> |              | to<br>benzene                                  | to<br>DMA <sup>g</sup> |
| H   | 8.7                                              | 17.00                | 16.97               | 20.82±0.01                   | 20.95                        | 0.00         | 2.65                                           | 8.17                   |
| Me  | 6.1                                              | 17.17                |                     | 20.95±0.06                   |                              | -0.04        | 2.61                                           | 8.02                   |
| MeO | 9.8                                              | 16.70                |                     | 20.71±0.04                   |                              | 0.27         | 2.66                                           | 8.18                   |
| F   | 16.5                                             | 16.16                | 16.30               |                              |                              | 0.52         | 2.88                                           | 8.56                   |
| Cl  | 18.4                                             | 16.09                |                     |                              |                              | 0.47         | 2.97                                           | 8.92                   |
| Br  | 17.5                                             | 16.04                | 16.13               |                              |                              | 0.50         | 2.97                                           | 8.92                   |

<sup>a</sup> For H-indole, the value was obtained from reaction progress study by in situ IR spectroscopy (conditions: 0.050 mmol **1a**, 0.10 mmol indole, 0.0050 mmol **3e**, 0.0010 mmol 4-NBSA, 50 mg 4Å MS in 2 mL toluene at 0 °C; see section 6 for procedure), and initial rates were taken at 10% conversion of **1a**. For the indole derivatives, the values were measured on the basis of competition experiments with indole under pseudo-zeroth order conditions (see section 8), and calculated using the following equations:

$$k_{\text{asym,R-indole}} = k_{\text{rel,asym,R-indole}} \times k_{\text{asym,indole}}; k_{\text{rac,R-indole}} = k_{\text{rel,rac,R-indole}} \times k_{\text{rac,indole}};$$

<sup>b</sup> See: Yagil, G. *J. Phys. Chem.* **71**, 1034-1044 (1967).

<sup>c</sup> Conducted using Bordwell method with 2-naphthylacetonitrile as indicator. For detailed procedure, see: Matthews, W. S. *et. al. J. Am. Chem. Soc.* **97**, 7006-7014 (1975).

<sup>d</sup> See: Bordwell, F. G., Drucker, G. E. & Fried, H. E. *J. Org. Chem.* **46**, 632-635 (1981).

<sup>e</sup> The inductive Hammett constants are obtained from Hansch, C. & Leo, A. *Substituent Constants for Correlation Analysis in Chemistry and Biology* (Wiley-Interscience: 1979).

<sup>f</sup> Conducted using Gaussian 09, DFT B3LYP 6-31G(d).

<sup>g</sup>DMA = dimethylacetamide; amide oxygen as H-bond donor.

A LFER could also be generated between  $\log(k_{\text{asym}}/k_{\text{rac}})$  and the inductive Hammett parameter ( $\sigma_1$ ). See the first figure below. The  $\sigma_1$  values represent the inductive ability of the substituents on indole, which is separated from their electronic properties associated with conjugation through the  $\pi$ -system. Since the indole N-H is on the plane of the  $\pi$  face and thus its acidity is only under the influence of inductive effects,  $\sigma_1$  can be used here to quantify the strength of an H-bond involving indole N-H.

In the main text and in section 7 of the Supplemental Information, we observed that in the thiourea-catalyzed condition, the linear relationship between  $\log(k_{\text{asym}})$  and Mayr nucleophilicity

parameter  $s_N N$  was poor ( $R^2 = 0.757$ ). This was explained by the possibility of an indole N-H hydrogen bonding interaction with the thiourea catalyst, which resulted in change of nucleophilicity of indole derivatives. In fact, if  $\log(k_{\text{asym}})$  of these 5-substituted indoles are plotted against  $(s_N N - pK_a)$ , a parameter linearly combining the Mayr nucleophilicity and the acidity of the nucleophiles, an improved correlation is obtained ( $R^2 = 0.953$ ). See the second figure below. This is consistent with that the “actual” nucleophilicity of indole derivatives in the thiourea-catalyzed reactions is under the control of both its intrinsic reactivity and the activation effect by the catalyst via H-bond. Therefore, it explains why the Mayr nucleophilicity plot of the asymmetric reaction was scattered.

#### Correlation between $\log(k_{\text{asym}}/k_{\text{rac}})$ and $\sigma_I$ of indole derivatives

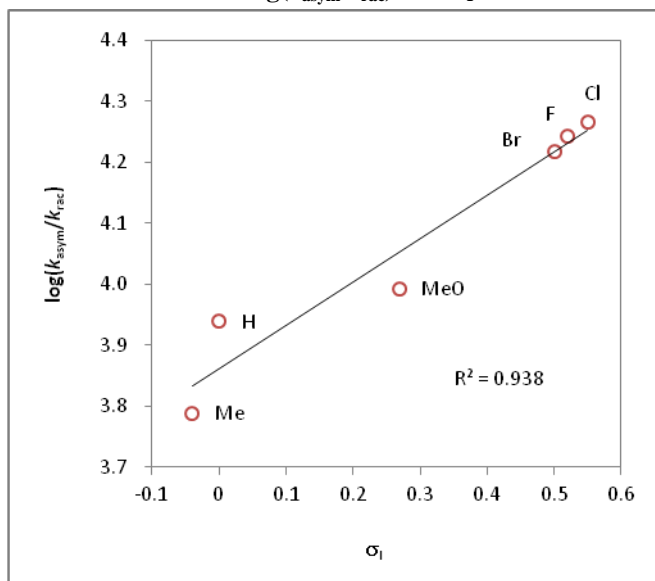

#### $pK_a$ -corrected Mayr analysis of the asymmetric reaction

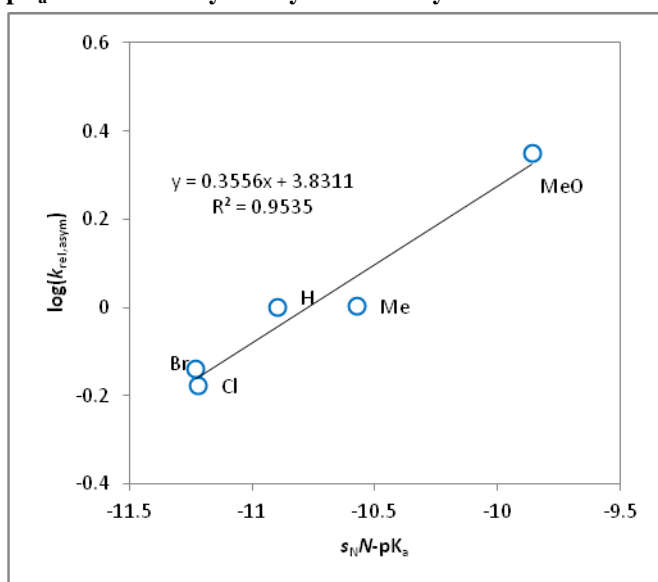

#### Structure-reactivity-selectivity study of $\pi$ -nucleophiles

General procedure:

For competition experiments: Following the procedure described in section 7, a second nucleophile

was applied to a competition experiment with indole, and the relative rate with respect to indole was determined with  $^1\text{H}$  NMR spectroscopy. The relative rate of indole is set to 1.

For reaction kinetic study with in situ IR spectroscopy: Followed the procedure described in section 6.

The reaction stoichiometry is shown below –

Azulene – 0.075 mmol **1a**, 0.15 mmol azulene, 7.5  $\mu\text{mol}$  **3e** or none, 7.5  $\mu\text{mol}$  4-NBSA (0.5 M in THF), 50 mg 4 $\text{\AA}$  MS, 1.5 mL toluene.

Pyrrole – 0.075 mmol **1a**, 0.15 mmol azulene, 7.5  $\mu\text{mol}$  **3e** or none, 3.75  $\mu\text{mol}$  4-NBSA (0.5 M in THF), 50 mg 4 $\text{\AA}$  MS, 1.5 mL toluene.

*N*-methylindole – 0.10 mmol **1a**, 0.20 mmol azulene, 10.0  $\mu\text{mol}$  **3e** or none, 5.0  $\mu\text{mol}$  4-NBSA (0.5 M in THF), 50 mg 4 $\text{\AA}$  MS, 1.5 mL toluene.

| NuH                    | $r_{\text{rel,asym}}^{a,b}$ | $r_{\text{rel,rac}}^{a,b}$ | $(r_{\text{asym}}/r_{\text{rac}})_{\text{rel}}$<br>(compt.) <sup>b</sup> | $r_{\text{asym}}^c$<br>( $10^{-6}$ M/s) | $r_{\text{rac}}^c$<br>( $10^{-6}$ M/s) | $r_{\text{asym}}/r_{\text{rac}}$<br>(RIR) <sup>c</sup> |
|------------------------|-----------------------------|----------------------------|--------------------------------------------------------------------------|-----------------------------------------|----------------------------------------|--------------------------------------------------------|
| indole                 | 1                           | 1                          | 1                                                                        | 1.40                                    | 60.8                                   | 43.4                                                   |
| benzotriazole          | 9.5                         | 10.3                       | 0.92                                                                     | n/d <sup>d</sup>                        | n/d <sup>d</sup>                       | n/d <sup>d</sup>                                       |
| azulene                | 0.038                       | 0.26                       | 0.15                                                                     | 4.10                                    | 13.2                                   | 3.2                                                    |
| pyrrole                | 0.21                        | 2.03                       | 0.11                                                                     | 1.17                                    | 3.69                                   | 3.2                                                    |
| <i>N</i> -methylindole | 0.13                        | 0.99                       | 0.13                                                                     | 1.03                                    | 3.92                                   | 3.8                                                    |

<sup>a</sup> Rate relative to reaction with indole under the same condition.

<sup>b</sup> Obtained from competition experiments with 1:1 nucleophile to indole.

<sup>c</sup> Obtained from reaction kinetic study with in situ IR, and initial rates taken at 10% conversion of **1a**.

<sup>d</sup> The rate of benzotriazole-involving reaction is not determined because kinetic analysis was complicated by the poor solubility of benzotriazole in the reaction solvent – toluene.

## 15. Crystallographic data of compounds **2b**, **2g** and **2q**

General information: The crystallographic data have been included in the \*.cif files as part of the Supplementary Information. In this section are presented the crystal structures, absolute configuration assignments and conditions for growing the crystals.

**2b**: (grew in hexanes/*i*-PrOH at room temperature, as a single enantiomer)

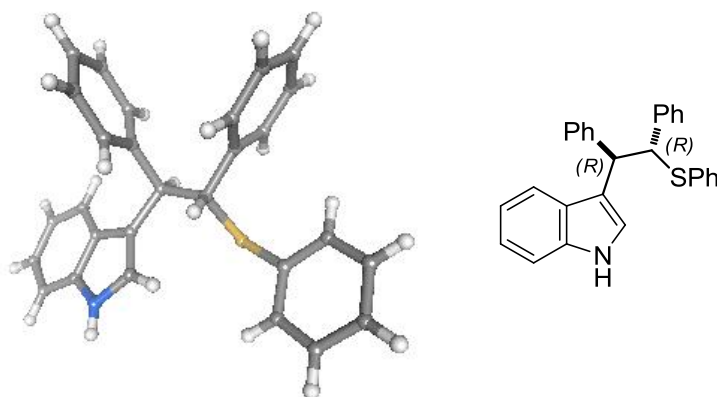

Ortepe-Plot (thermal ellipsoids shown at 50% probability level)



**2g**: (grew in hexanes/MeOH at room temperature, as a 1:1 mixture of enantiomers)

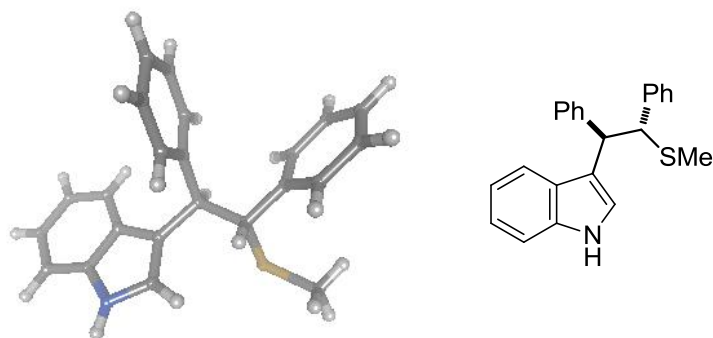

Ortep-Plot (thermal ellipsoids shown at 50% probability level)

**2q**: (grew in hexanes/*i*-PrOH at room temperature, as a single enantiomer)

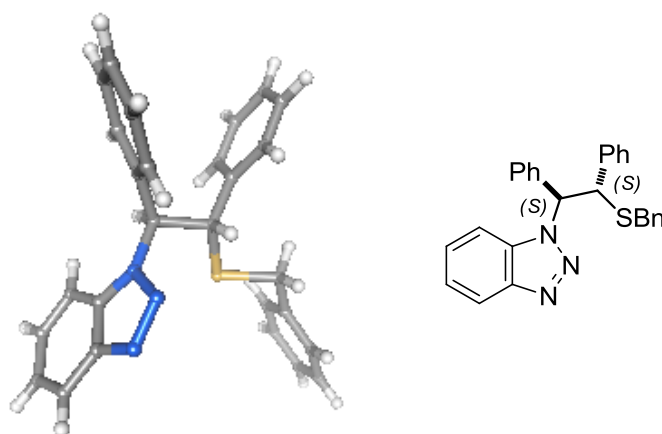

Ortep-Plot (thermal ellipsoids shown at 50% probability level)

The absolute stereochemistry of product **2a** was determined by derivatization (reductive removal of the sulfanyl group –SBn) and comparison with product **2b**, as (*R*, *R*).

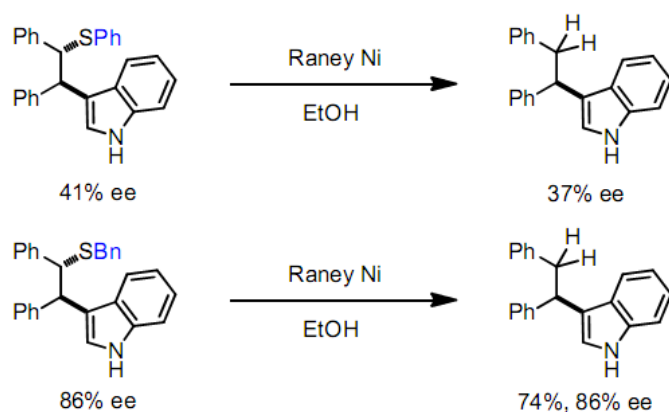

Procedure for Raney Ni promoted reduction of products **1a** and **1b**:

To a solution of the freshly prepared sulfide product (1 equiv) in ethanol (0.05 M) at room temperature was added Raney 2800 nickel (slurry in water, about the same volume as ethanol). The biphasic mixture was stirred vigorously until TLC showed complete consumption of the starting material. The mixture was then filtered through a celite plug, and diluted with water and DCM. The aqueous layer

was separated and extracted with DCM. The combined organic layers were dried over Na<sub>2</sub>SO<sub>4</sub>, concentrated on vacuum, and applied to flash column chromatography. The product was obtained as a white solid, and <sup>1</sup>H NMR and mass spectroscopic data matched literature report perfectly. The enantiomeric excess was determined by chiral HPLC analysis (ChiralPak OD-H, 10% *i*-PrOH, 1 mL/min, 220 nm, *t*<sub>r</sub>(major) = 21 min, *t*<sub>r</sub>(minor) = 25 min).

Reduction product from **1a**:

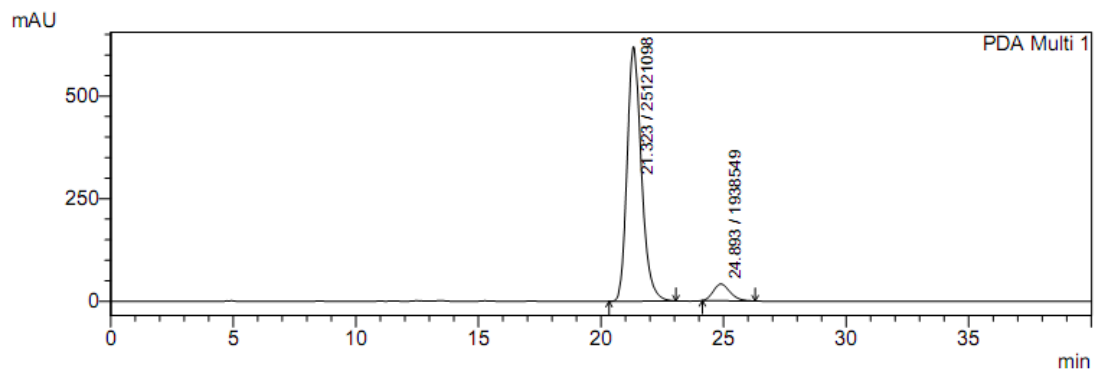

Reduction product from **1b**:

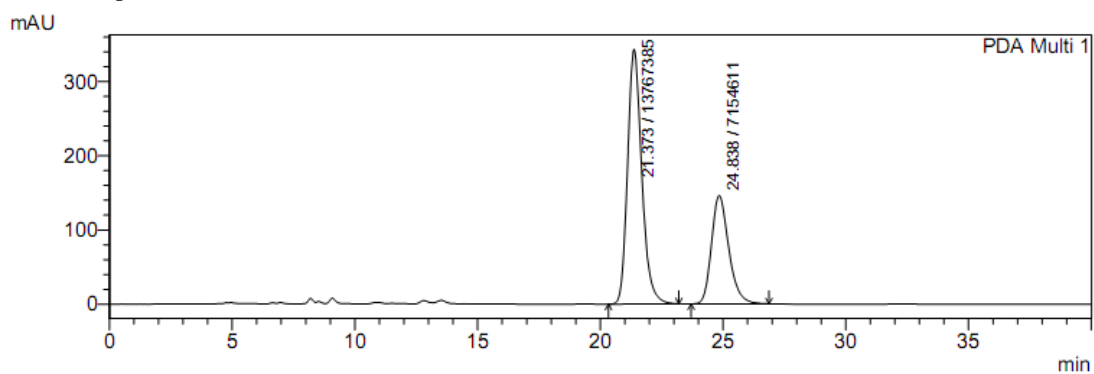

## 16. Characterization of products 2a-2z

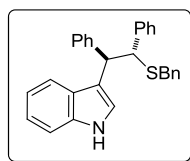

### 3-((1R,2R)-2-(benzylthio)-1,2-diphenylethyl)-1H-indole (**2a**)

Followed method B from **1a** (23.2 mg, 0.05 mmol), for 45 h, and purified using silica gel chromatography to give 20.8 mg (99% yield) of **2a** as a white solid. This material was determined to be 93% ee by chiral HPLC analysis (ChiralPak AD-H, 10% *i*-PrOH, 1 mL/min, 240 nm,  $t_r$ (major) = 24 min,  $t_r$ (minor) = 33 min). IR (Film): 3419 (s), 3026, 1599, 1491, 1453 (s), 1417, 1336, 1264, 1071, 736 (s), 694 (s)  $\text{cm}^{-1}$ ;  $^1\text{H}$  NMR (500 MHz,  $\text{CDCl}_3$ )  $\delta$  = 8.02 (br. s., 1H), 7.44 (d,  $J=7.8$  Hz, 1H), 7.37 - 6.90 (m, 19H), 4.66 (d,  $J=10.5$  Hz, 1H), 4.46 (d,  $J=10.5$  Hz, 1H), 3.45 (d,  $J=13.7$  Hz, 1H), 3.28 (d,  $J=13.7$  Hz, 1H);  $^{13}\text{C}$  NMR (125 MHz,  $\text{CDCl}_3$ )  $\delta$  = 142.64, 140.94, 138.40, 136.00, 129.19, 129.09, 128.45, 128.41, 128.23, 127.91, 127.72, 127.25, 126.80, 126.76, 125.88, 122.38, 121.90, 119.44, 119.36, 117.11, 111.00, 54.07, 49.59, 35.77; MS (ESI-APCI) exact mass calculated for [M-SBn] ( $\text{C}_{22}\text{H}_{18}\text{N}$ ) requires  $m/z$  296.1, found  $m/z$  296.1;  $[\alpha]_{\text{D}}^{23} = +130.6$  ( $c = 0.5$ ,  $\text{CH}_2\text{Cl}_2$ ).

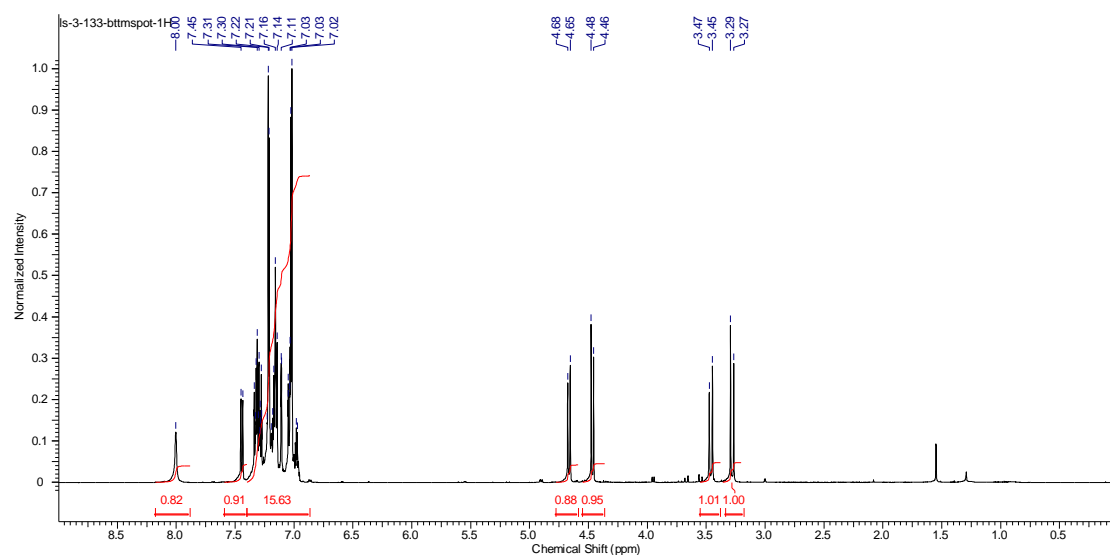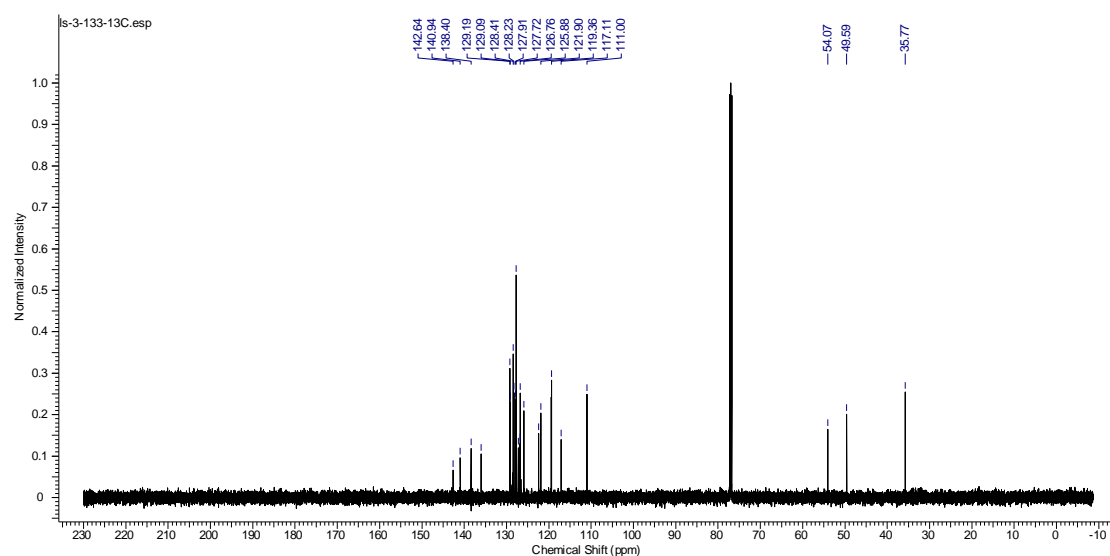

**Racemic sample:**

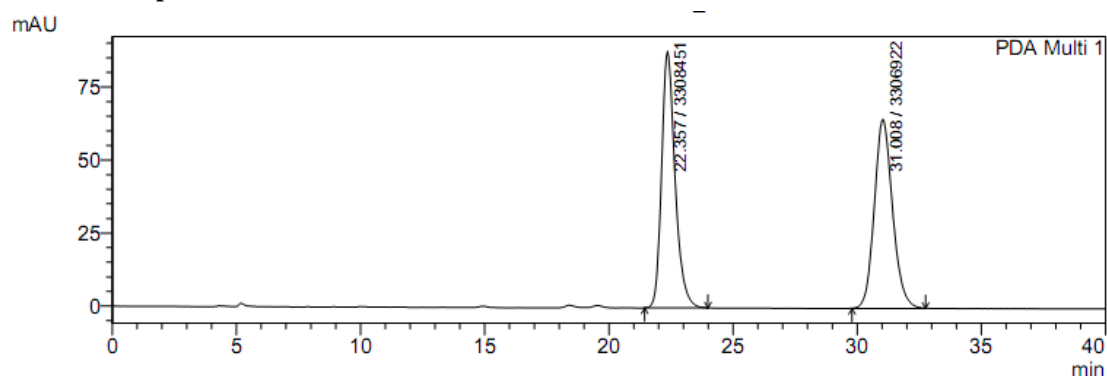

PDA Ch1 240nm 4nm

| Peak# | Ret. Time | Area    | Height | Area %  | Height % |
|-------|-----------|---------|--------|---------|----------|
| 1     | 22.357    | 3308451 | 87910  | 50.012  | 57.730   |
| 2     | 31.008    | 3306922 | 64367  | 49.988  | 42.270   |
| Total |           | 6615373 | 152277 | 100.000 | 100.000  |

**Enantioenriched sample:**

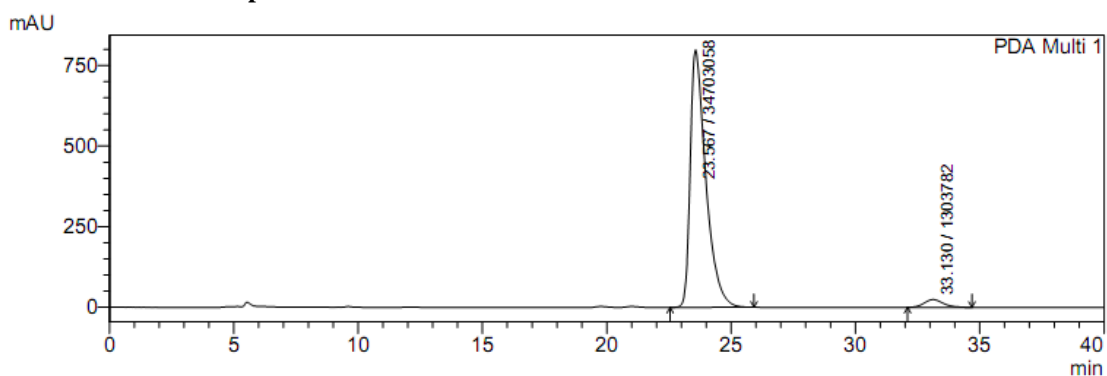

PDA Ch1 240nm 4nm

| Peak# | Ret. Time | Area     | Height | Area %  | Height % |
|-------|-----------|----------|--------|---------|----------|
| 1     | 23.567    | 34703058 | 799071 | 96.379  | 97.037   |
| 2     | 33.130    | 1303782  | 24397  | 3.621   | 2.963    |
| Total |           | 36006841 | 823468 | 100.000 | 100.000  |

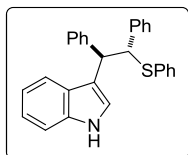

### 3-((1*R*,2*R*)-1,2-diphenyl-2-(phenylthio)ethyl)-1*H*-indole (**2b**)

Followed method B from **1b** (22.6 mg, 0.05 mmol), for 63 h, and purified using silica gel chromatography to give 16.8 mg (83% yield) of **2b** as a white solid. This material was determined to be 85% ee by chiral HPLC analysis (ChiralPak AD-H, 10% *i*-PrOH, 1 mL/min, 220 nm,  $t_r$ (major) = 29 min,  $t_r$ (minor) = 18 min). IR (Film): 3412 (s), 3058, 3027, 1582, 1490, 1454 (s), 1418, 1337, 1098, 1026, 740 (s), 695 (s)  $\text{cm}^{-1}$ ;  $^1\text{H}$  NMR: (500 MHz,  $\text{CDCl}_3$ )  $\delta$  8.04 (br. s., 1H), 7.57 (d,  $J=8.3$  Hz, 1H), 7.46 - 7.30 (m, 2H), 7.23 - 7.01 (m, 17H), 5.02 (d,  $J=9.3$  Hz, 1H), 4.83 (d,  $J=9.8$  Hz, 1H);  $^{13}\text{C}$  NMR: (125 MHz,  $\text{CDCl}_3$ )  $\delta$  142.32, 140.98, 136.02, 135.54, 132.10, 128.84, 128.61, 128.42, 127.83, 127.66, 127.26, 126.63, 126.06, 122.46, 122.01, 119.46, 119.29, 117.19, 111.11, 58.93, 49.23; MS (ESI-APCI) exact mass calculated for [M-SPh] ( $\text{C}_{22}\text{H}_{18}\text{N}$ ) requires  $m/z$  296.1, found  $m/z$  296.2;  $[\alpha]_{\text{D}}^{25} = +38.6$  ( $c = 1.0$ ,  $\text{CH}_2\text{Cl}_2$ ).

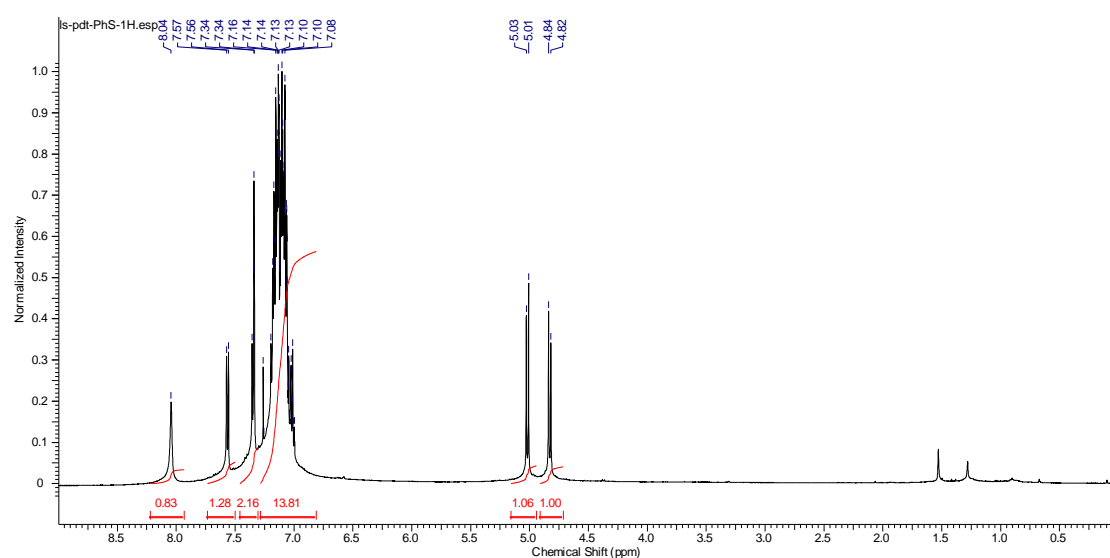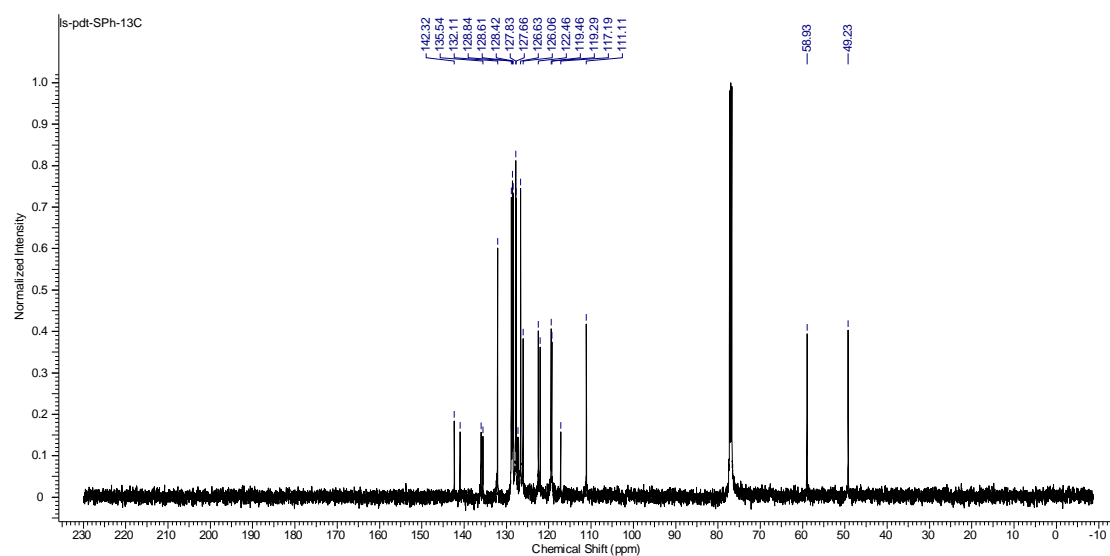

### Racemic sample:

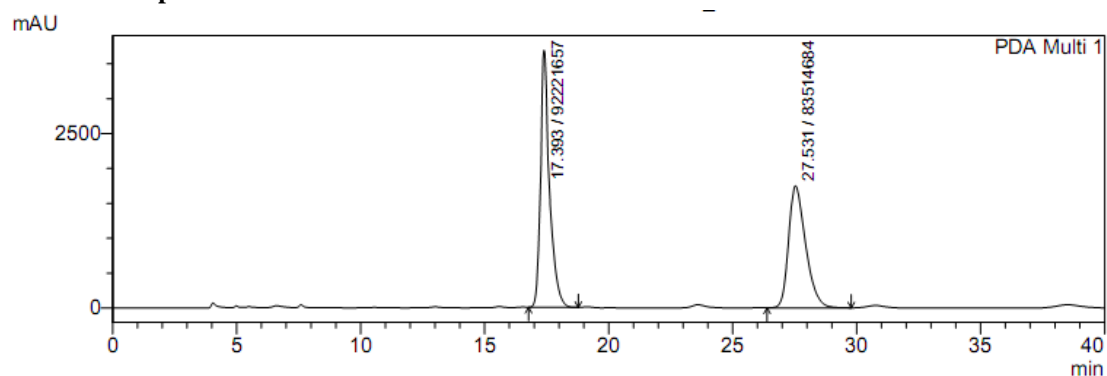

PDA Ch1 220nm 4nm

| Peak# | Ret. Time | Area      | Height  | Area %  | Height % |
|-------|-----------|-----------|---------|---------|----------|
| 1     | 17.393    | 92221657  | 3686825 | 52.477  | 67.826   |
| 2     | 27.531    | 83514684  | 1748846 | 47.523  | 32.174   |
| Total |           | 175736342 | 5435672 | 100.000 | 100.000  |

### Enantioenriched sample:

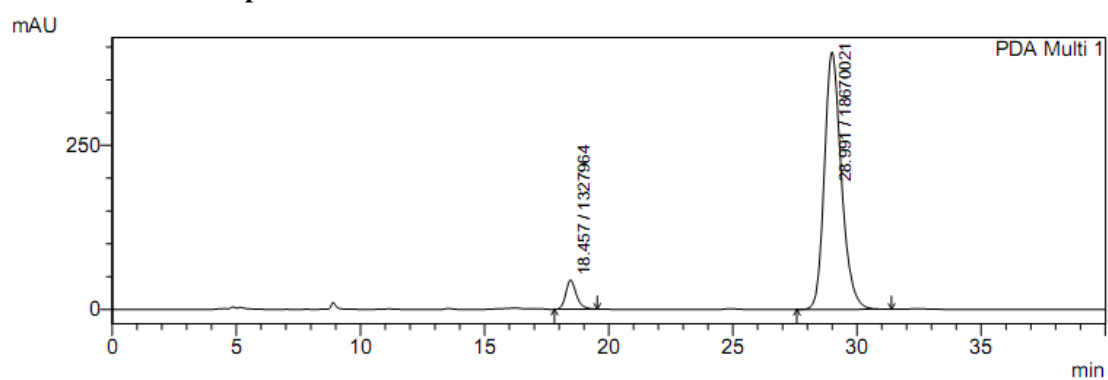

PDA Ch1 220nm 4nm

| Peak# | Ret. Time | Area     | Height | Area %  | Height % |
|-------|-----------|----------|--------|---------|----------|
| 1     | 18.457    | 1327964  | 44652  | 6.640   | 10.220   |
| 2     | 28.991    | 18670021 | 392252 | 93.360  | 89.780   |
| Total |           | 19997986 | 436904 | 100.000 | 100.000  |

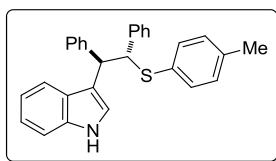

### 3-((1R,2R)-1,2-diphenyl-2-(*p*-tolylthio)ethyl)-1H-indole (**2c**)

Followed method B from **1c** (23.2 mg, 0.05 mmol), for 63 h, and purified using silica gel chromatography to give 16.0 mg (76% yield) of **2c** as a colorless gel. This material was determined to be 87% ee by chiral HPLC analysis (ChiralPak AD-H, 10% *i*-PrOH, 1 mL/min, 220 nm,  $t_r$ (major) = 33 min,  $t_r$ (minor) = 16 min). IR (Film): 3421 (br, s), 3026, 1491, 1454 (s), 1418, 1337, 1098, 1030, 909, 808, 739 (s), 696 (s)  $\text{cm}^{-1}$ ;  $^1\text{H}$  NMR: (500 MHz,  $\text{CDCl}_3$ )  $\delta$  8.05 (br. s., 1H), 7.55 (d,  $J=8.2$  Hz, 1H), 7.42 - 7.33 (m, 2H), 7.21 - 6.98 (m, 14H), 6.92 (d,  $J=7.8$  Hz, 2H), 4.94 (d,  $J=9.6$  Hz, 1H), 4.81 (d,  $J=9.6$  Hz, 1H), 2.24 (s, 3H);  $^{13}\text{C}$  NMR: (125 MHz,  $\text{CDCl}_3$ )  $\delta$  142.42, 141.20, 136.83, 136.04, 132.75, 131.66, 129.23, 128.87, 128.63, 127.80, 127.61, 127.29, 126.55, 126.00, 122.44, 121.98, 119.44, 119.33, 117.35, 111.10, 59.33, 49.08, 21.03; MS (ESI-APCI) exact mass calculated for [M-SAr] ( $\text{C}_{22}\text{H}_{18}\text{N}$ ) requires  $m/z$  296.1, found  $m/z$  296.1;  $[\alpha]_D^{24} = +56.2$  ( $c = 1.0$ ,  $\text{CH}_2\text{Cl}_2$ ).

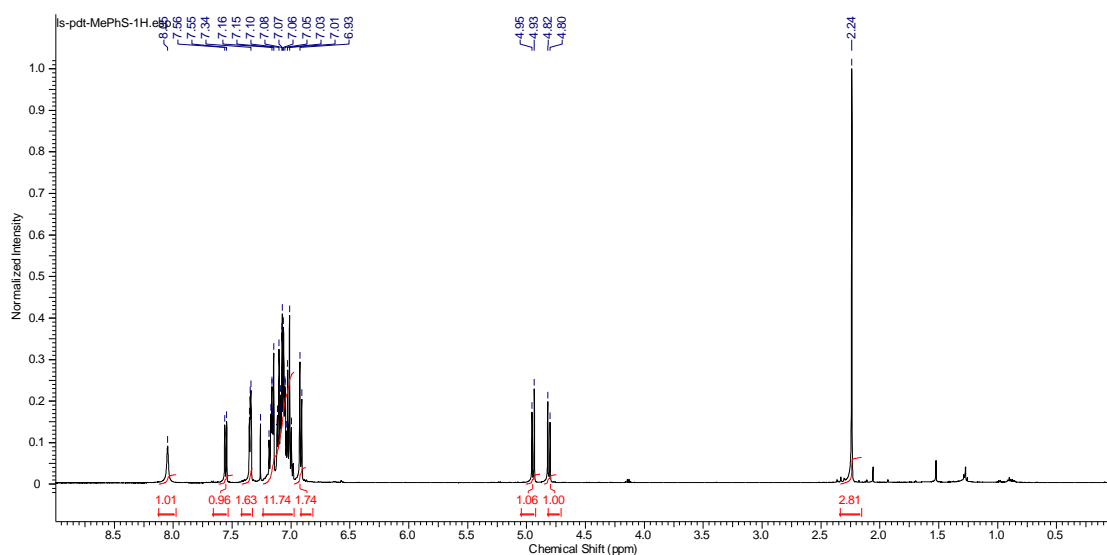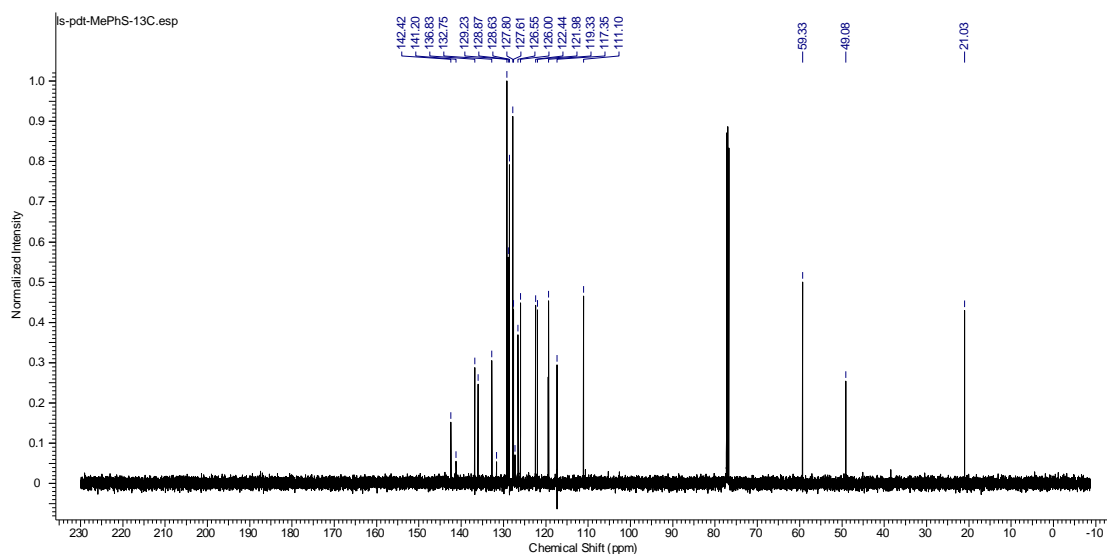

**Racemic sample:**

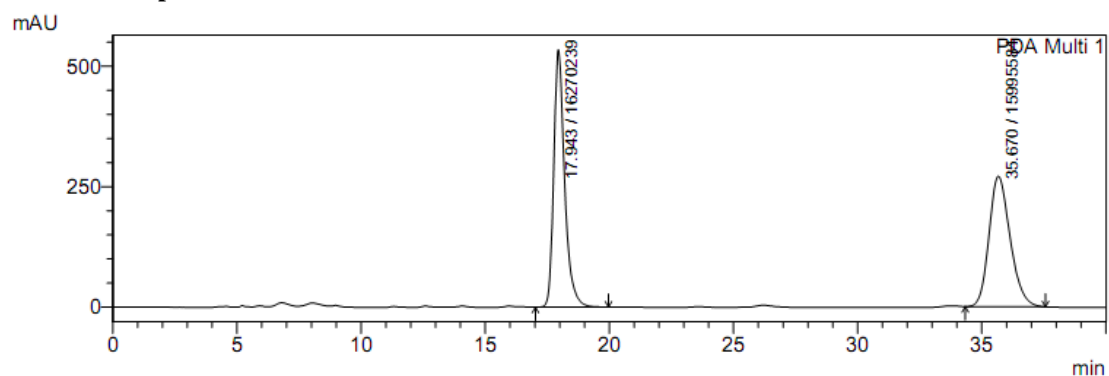

PDA Ch1 220nm 4nm

| Peak# | Ret. Time | Area     | Height | Area %  | Height % |
|-------|-----------|----------|--------|---------|----------|
| 1     | 17.943    | 16270239 | 534381 | 50.426  | 66.336   |
| 2     | 35.670    | 15995584 | 271188 | 49.574  | 33.664   |
| Total |           | 32265823 | 805569 | 100.000 | 100.000  |

**Enantioenriched sample:**

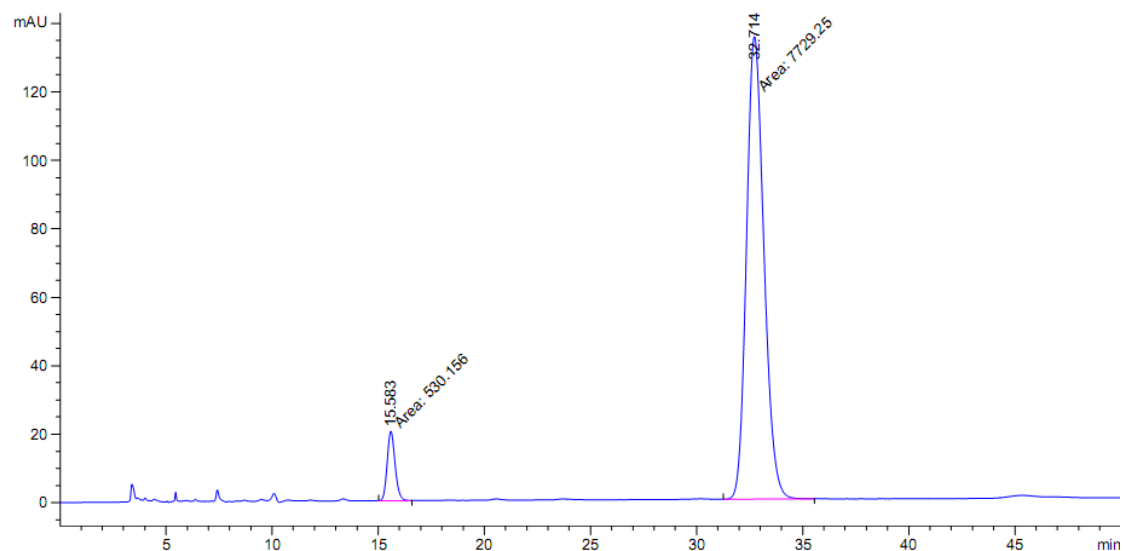

| Peak # | RetTime [min] | Type | Width [min] | Area [mAU*s] | Height [mAU] | Area %  |
|--------|---------------|------|-------------|--------------|--------------|---------|
| 1      | 15.583        | MM   | 0.4344      | 530.15643    | 20.34227     | 6.4188  |
| 2      | 32.714        | MM   | 0.9529      | 7729.24707   | 135.18980    | 93.5812 |



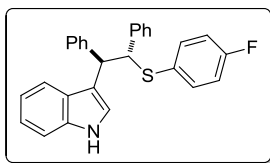

### 3-((1R,2R)-2-((4-fluorophenyl)thio)-1,2-diphenylethyl)-1H-indole (**2d**)

Followed method B from **1d** (23.4 mg, 0.05 mmol), for 63 h, and purified using silica gel chromatography to give 15.4 mg (73% yield) of **2d** as a colorless gel. This material was determined to be 81% ee by chiral SFC analysis (ChiralPak AD-H, 10% *i*-PrOH, 1 mL/min, 220 nm,  $t_r$ (major) = 16 min,  $t_r$ (minor) = 30 min). IR (Film): 3422 (s), 3059, 1588, 1488 (s), 1454, 1337, 1223, 1155, 1096, 1012, 829, 740 (s), 698 (s)  $\text{cm}^{-1}$ ;  $^1\text{H}$  NMR: (500 MHz,  $\text{CDCl}_3$ )  $\delta$  8.08 (br. s., 1H), 7.61 (d,  $J=7.8$  Hz, 1H), 7.41 - 7.31 (m, 2H), 7.24 - 6.93 (m, 14H), 6.85 - 6.72 (m, 2H), 4.93 (d,  $J=10.1$  Hz, 1H), 4.82 (d,  $J=10.5$  Hz, 1H);  $^{13}\text{C}$  NMR: (125 MHz,  $\text{CDCl}_3$ )  $\delta$  162.46 (d,  $J=246.3$  Hz, 1C), 142.65, 141.06, 136.35, 135.65, 135.58, 130.44, 129.06, 128.75, 128.16, 128.01, 127.48, 126.99, 126.32, 122.63, 122.36, 119.80, 119.57, 117.56, 115.79, 115.63, 111.45, 60.24, 49.30; MS (ESI-APCI) exact mass calculated for [M-SAr] ( $\text{C}_{22}\text{H}_{18}\text{N}$ ) requires  $m/z$  296.1, found  $m/z$  296.1;  $[\alpha]_{\text{D}}^{24} = +58.0$  ( $c = 1.0$ ,  $\text{CH}_2\text{Cl}_2$ ).

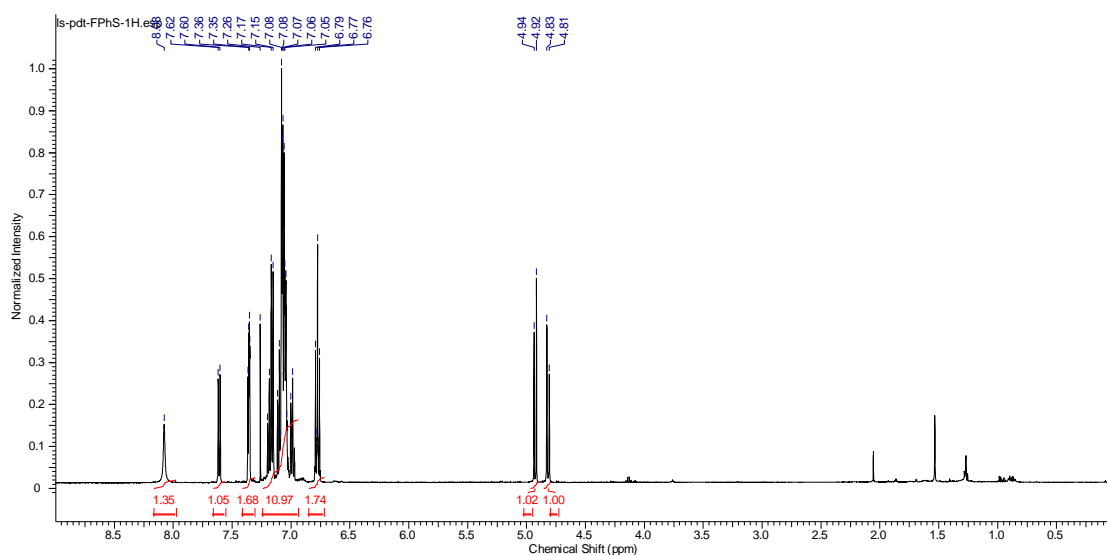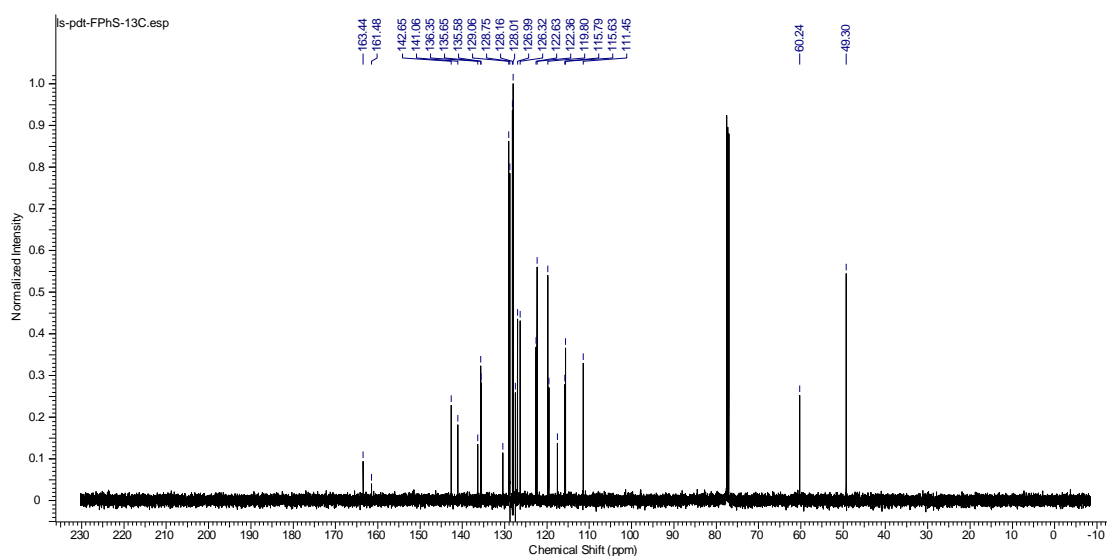

**Racemic sample:**

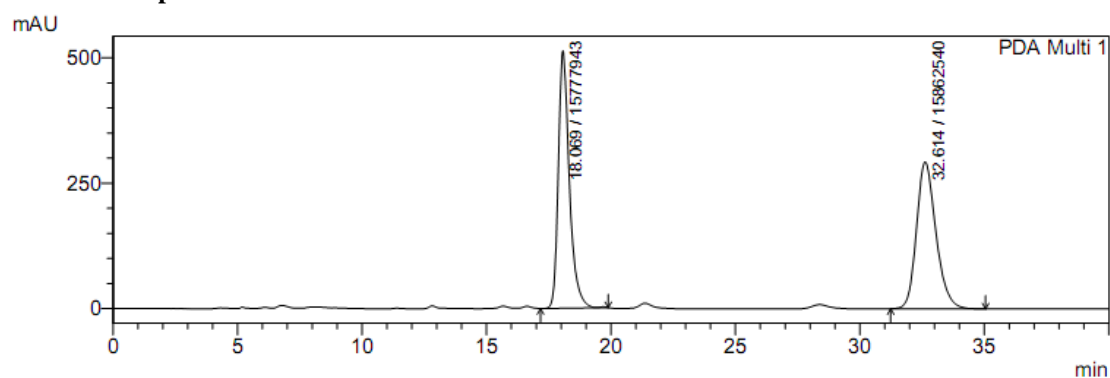

PDA Ch1 220nm 4nm

| Peak# | Ret. Time | Area     | Height | Area %  | Height % |
|-------|-----------|----------|--------|---------|----------|
| 1     | 18.069    | 15777943 | 513623 | 49.866  | 63.667   |
| 2     | 32.614    | 15862540 | 293112 | 50.134  | 36.333   |
| Total |           | 31640483 | 806735 | 100.000 | 100.000  |

**Enantioenriched sample:**

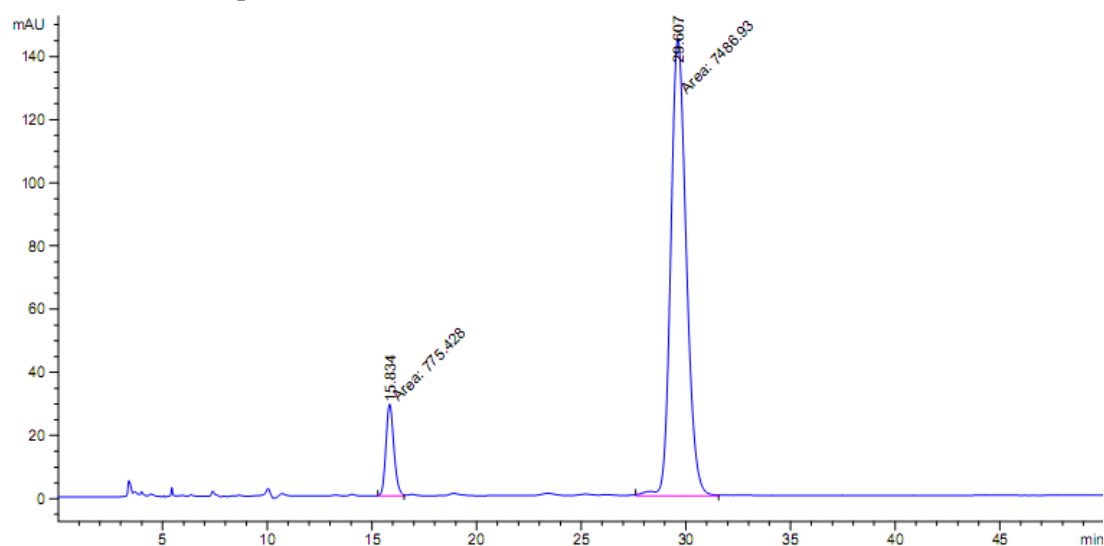

| Peak # | RetTime [min] | Type | Width [min] | Area [mAU*s] | Height [mAU] | Area %  |
|--------|---------------|------|-------------|--------------|--------------|---------|
| 1      | 15.834        | MM   | 0.4436      | 775.42773    | 29.13649     | 9.3851  |
| 2      | 29.607        | MM   | 0.8621      | 7486.93164   | 144.73430    | 90.6149 |

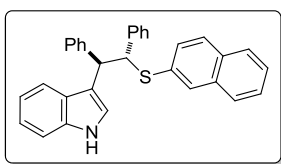

### 3-((1R,2R)-2-(naphthalen-2-ylthio)-1,2-diphenylethyl)-1H-indole (**2e**)

Followed method B from **1e** (25.0 mg, 0.05 mmol), for 63 h, and purified using silica gel chromatography to give 20.5 mg (90% yield) of **2e** as a white solid. This material was determined to be 88% ee by chiral HPLC analysis (ChiralPak AS-H, 10% *i*-PrOH, 1 mL/min, 220 nm,  $t_r$ (major) = 16 min,  $t_r$ (minor) = 31 min). IR (Film): 3422 (s), 3055, 1585, 1491, 1454 (s), 1337, 1098, 1073, 907 (s), 813, 738 (s), 697 (s)  $\text{cm}^{-1}$ ;  $^1\text{H}$  NMR: (500 MHz,  $\text{CDCl}_3$ )  $\delta$  8.02 (br. s., 1H), 7.88 - 7.68 (m, 1H), 7.68 - 7.52 (m, 3H), 7.52 - 7.39 (m, 2H), 7.39 - 7.31 (m, 2H), 7.31 - 7.17 (m, 5H), 7.17 - 6.93 (m, 6H), 5.14 (d,  $J=9.8$  Hz, 1H), 4.90 (d,  $J=9.8$  Hz, 1H);  $^{13}\text{C}$  NMR: (125 MHz,  $\text{CDCl}_3$ )  $\delta$  142.33, 140.99, 136.01, 133.43, 133.06, 131.94, 130.50, 129.49, 128.79, 128.60, 127.87, 127.80, 127.76, 127.50, 127.30, 127.26, 126.72, 126.10, 126.08, 125.75, 122.47, 122.04, 119.49, 119.31, 117.23, 111.12, 58.88, 49.27; MS (ESI-APCI) exact mass calculated for [M-SAr] ( $\text{C}_{22}\text{H}_{18}\text{N}$ ) requires  $m/z$  296.1, found  $m/z$  296.1;  $[\alpha]_D^{24} = +40.9$  ( $c = 1.0$ ,  $\text{CH}_2\text{Cl}_2$ ).

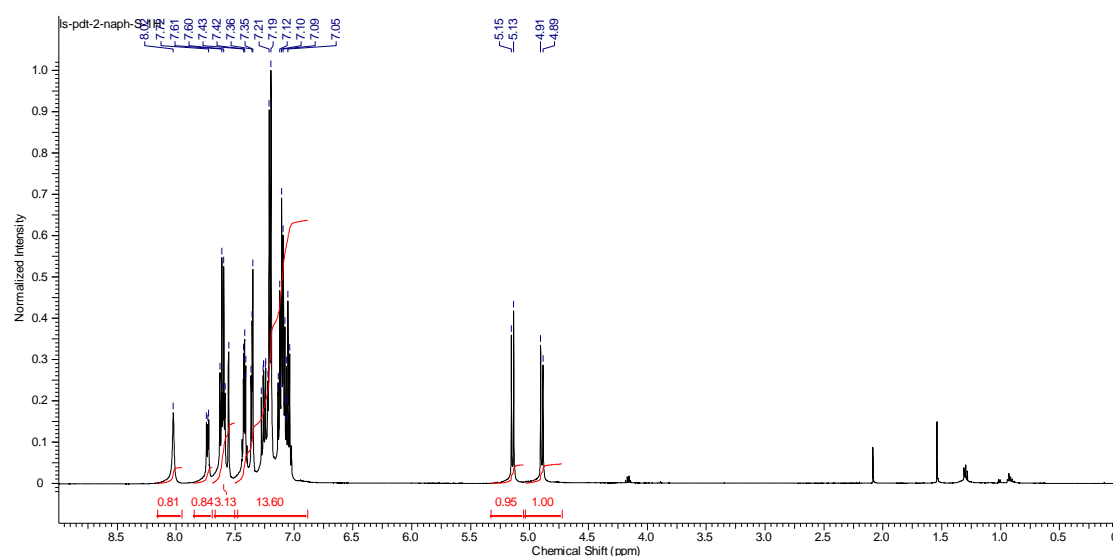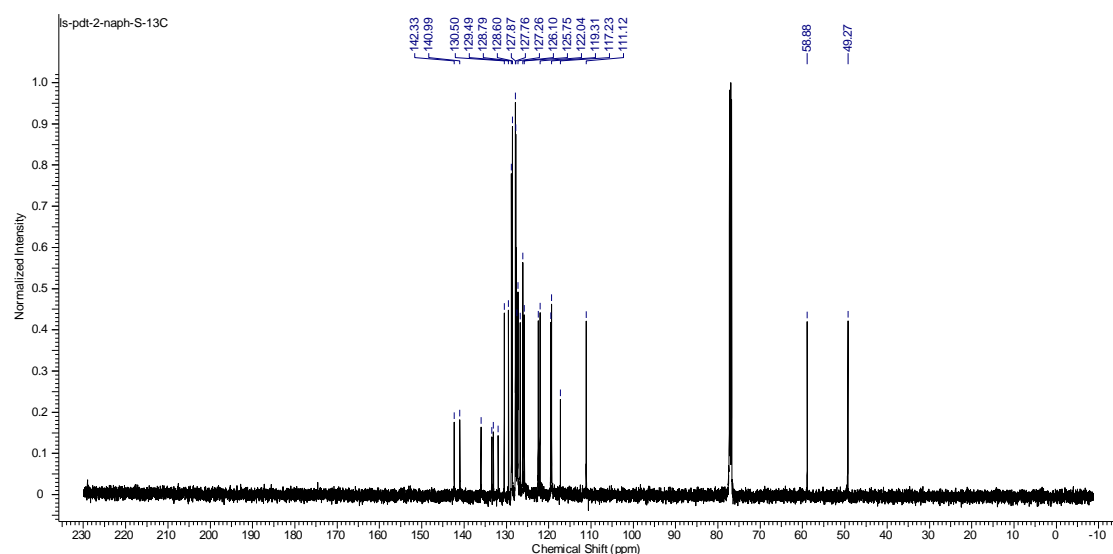

**Racemic sample:**

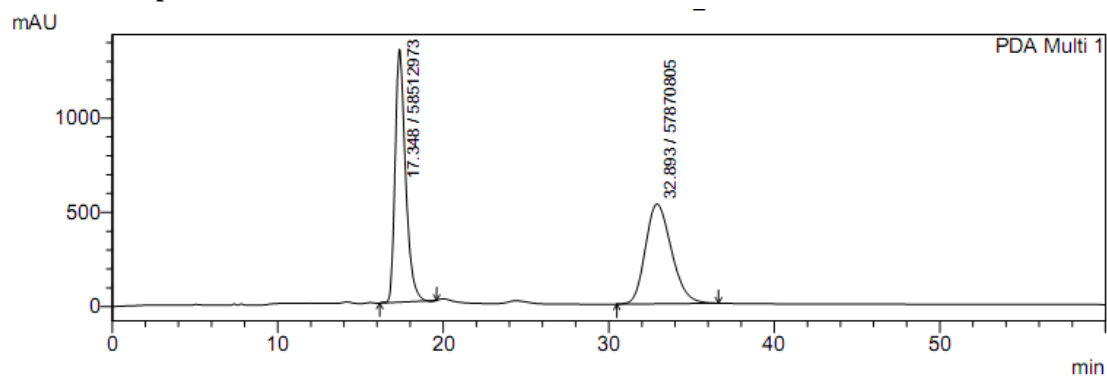

PDA Ch1 220nm 4nm

| Peak# | Ret. Time | Area      | Height  | Area %  | Height % |
|-------|-----------|-----------|---------|---------|----------|
| 1     | 17.348    | 58512973  | 1342223 | 50.276  | 71.677   |
| 2     | 32.893    | 57870805  | 530380  | 49.724  | 28.323   |
| Total |           | 116383778 | 1872604 | 100.000 | 100.000  |

**Enantioenriched sample:**

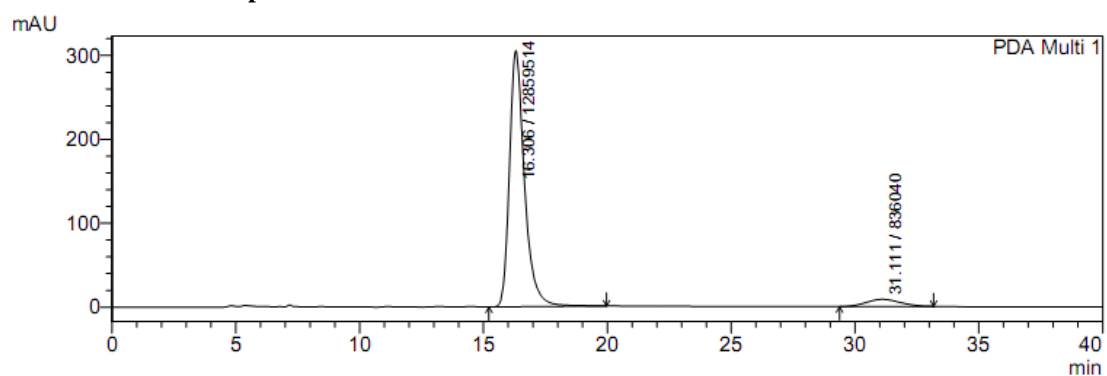

PDA Ch1 220nm 4nm

| Peak# | Ret. Time | Area     | Height | Area %  | Height % |
|-------|-----------|----------|--------|---------|----------|
| 1     | 16.306    | 12859514 | 305249 | 93.896  | 97.243   |
| 2     | 31.111    | 836040   | 8654   | 6.104   | 2.757    |
| Total |           | 13695554 | 313902 | 100.000 | 100.000  |

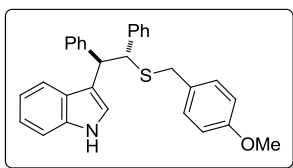

### 3-((1R,2R)-((4-methoxybenzyl)thio)-1,2-diphenylethyl)-1H-indole

(2f)

Followed method B from **1f** (24.7 mg, 0.05 mmol), for 45 h, purified using silica gel chromatography to give 22.7 mg (>99% yield) of **2f** as a colorless gel. This material was determined to be 94% ee by chiral

HPLC analysis (ChiralPak AD-H, 10% *i*-PrOH, 1 mL/min, 240 nm,  $t_r(\text{major}) = 30$  min,  $t_r(\text{minor}) = 45$  min). IR (Film): 3420 (s), 3027, 2910, 1609, 1510 (s), 1454, 1249 (s), 1175, 1032, 741 (s)  $\text{cm}^{-1}$ ;  $^1\text{H}$  NMR: (500 MHz,  $\text{CDCl}_3$ )  $\delta$  8.02 (br. s., 1H), 7.43 (d,  $J=8.2$  Hz, 1H), 7.33 (d,  $J=8.2$  Hz, 1H), 7.25 - 7.10 (m, 7H), 7.09 - 6.92 (m, 8H), 6.89 - 6.77 (m, 2H), 4.65 (d,  $J=10.5$  Hz, 1H), 4.45 (d,  $J=10.1$  Hz, 1H), 3.84 (s, 3H), 3.40 (d,  $J=13.7$  Hz, 1H), 3.23 (d,  $J=13.3$  Hz, 1H);  $^{13}\text{C}$  NMR: (125 MHz,  $\text{CDCl}_3$ )  $\delta$  158.43, 142.67, 141.02, 136.02, 130.34, 130.13, 129.19, 128.43, 127.88, 127.72, 127.26, 126.75, 125.87, 122.41, 121.89, 119.47, 119.34, 117.18, 113.60, 110.99, 55.28, 53.96, 49.59, 35.12; MS (ESI-APCI) exact mass calculated for  $[\text{M}+\text{H}]^+$  ( $\text{C}_{30}\text{H}_{28}\text{NOS}$ ) requires  $m/z$  450.2, found  $m/z$  450.2;  $[\alpha]_D^{23} = +134.5$  ( $c = 0.4$ ,  $\text{CH}_2\text{Cl}_2$ ).

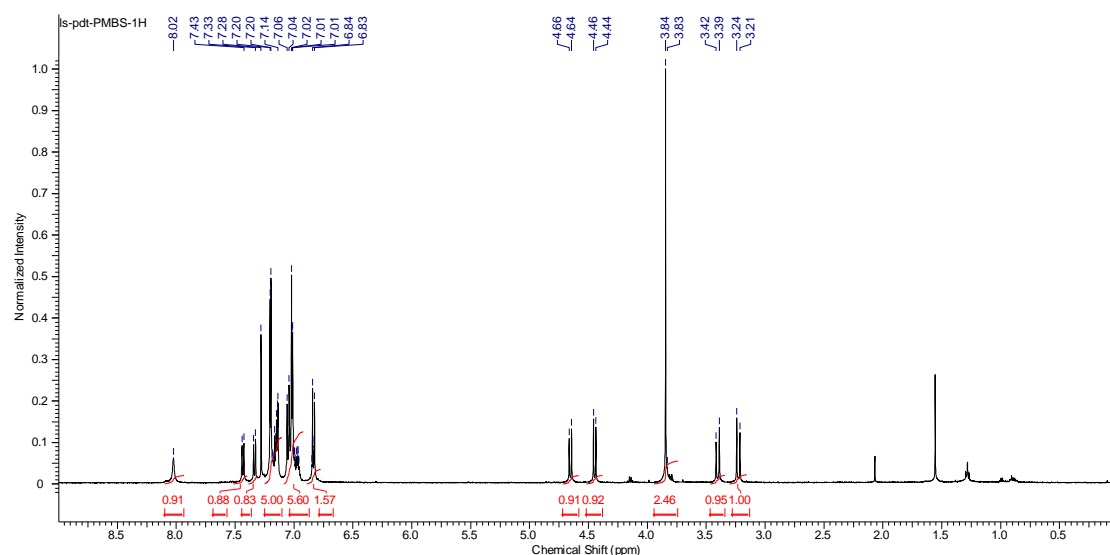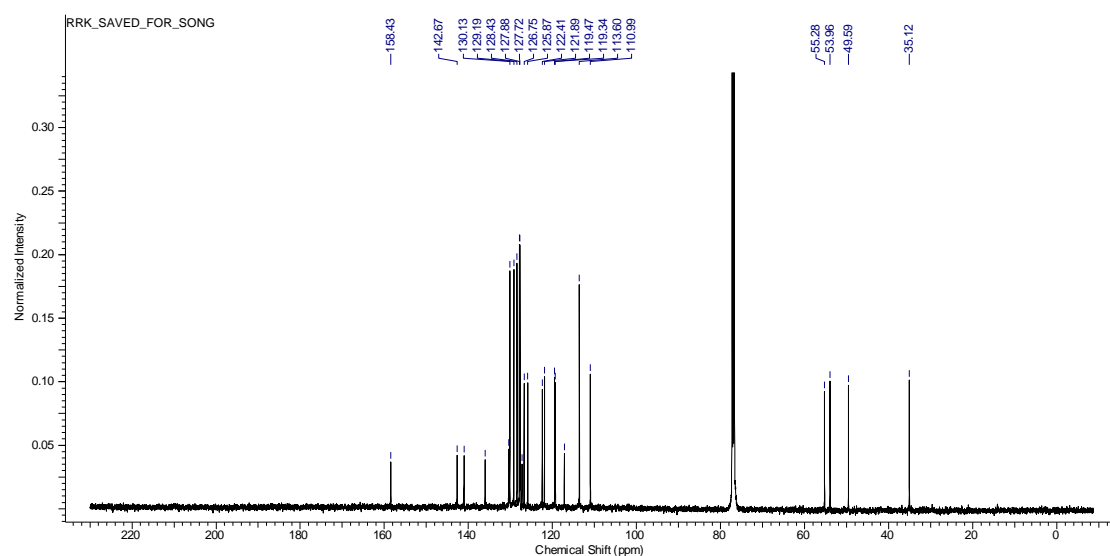

**Racemic sample:**

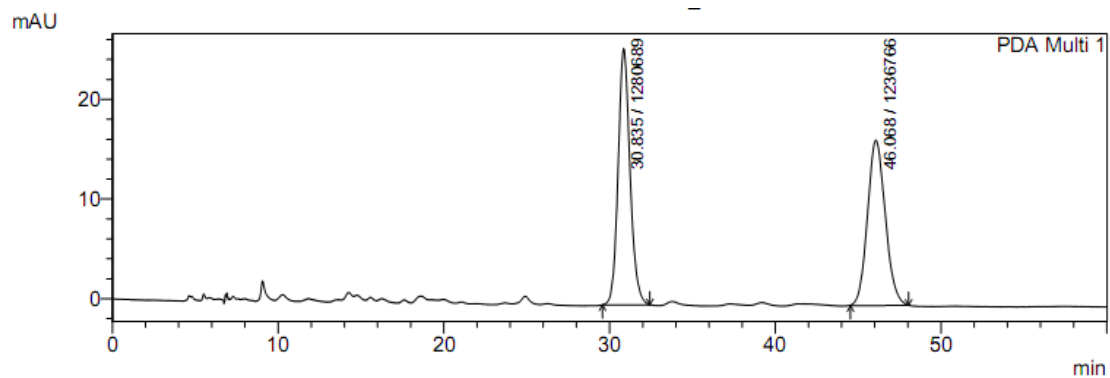

PDA Ch1 240nm 4nm

| Peak# | Ret. Time | Area    | Height | Area %  | Height % |
|-------|-----------|---------|--------|---------|----------|
| 1     | 30.835    | 1280689 | 25745  | 50.872  | 60.772   |
| 2     | 46.068    | 1236766 | 16618  | 49.128  | 39.228   |
| Total |           | 2517455 | 42362  | 100.000 | 100.000  |

**Enantioenriched sample:**

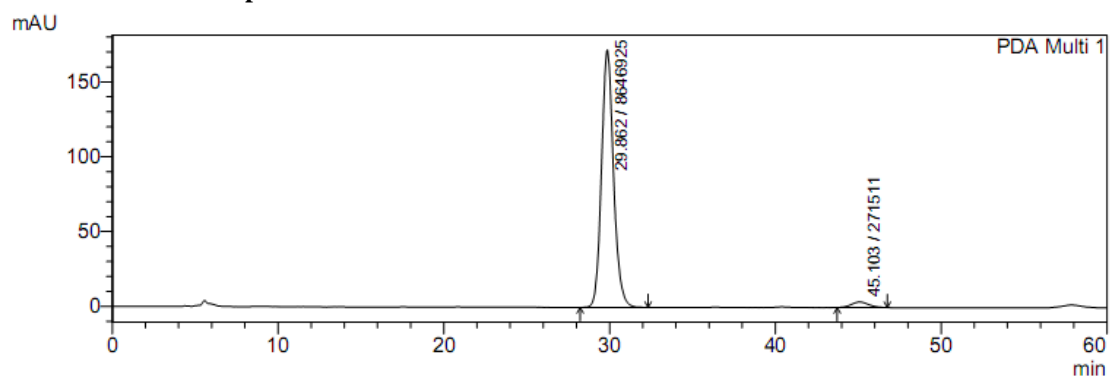

PDA Ch1 240nm 4nm

| Peak# | Ret. Time | Area    | Height | Area %  | Height % |
|-------|-----------|---------|--------|---------|----------|
| 1     | 29.862    | 8646925 | 172159 | 96.956  | 97.860   |
| 2     | 45.103    | 271511  | 3765   | 3.044   | 2.140    |
| Total |           | 8918435 | 175924 | 100.000 | 100.000  |

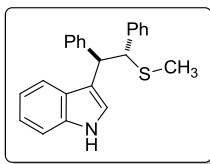

### 3-((1*R*,2*R*)-2-(methylthio)-1,2-diphenylethyl)-1*H*-indole (**2g**)

Followed method B from **1g** (19.4 mg, 0.25 mmol), for 45 h, and purified using silica gel chromatography to give 12.3 mg (72% yield) of **2g** as a colorless gel.

This material was determined to be 84% ee by chiral HPLC analysis (ChiralPak AS-H, 10% *i*-PrOH, 1 mL/min, 220 nm,  $t_r$ (major) = 14 min,  $t_r$ (minor) = 17 min).

IR (Film): 3419 (s), 3027, 2913, 1714, 1600, 1490, 1454 (s), 1420, 1337, 1276, 1098, 1012, 740 (s), 697 (s)  $\text{cm}^{-1}$ ;  $^1\text{H}$  NMR: (500 MHz,  $\text{CDCl}_3$ )  $\delta$  8.08 (br. s., 1H), 7.62 (d,  $J=8.2$  Hz, 1H), 7.39 (d,  $J=2.7$  Hz, 1H), 7.36 (d,  $J=7.8$  Hz, 1H), 7.33 - 7.25 (m, 2H), 7.25 - 7.05 (m, 9H), 7.04 - 6.94 (m, 1H), 4.72 (d,  $J=10.5$  Hz, 1H), 4.61 (d,  $J=10.1$  Hz, 1H);  $^{13}\text{C}$  NMR: (125 MHz,  $\text{CDCl}_3$ )  $\delta$  142.79, 140.89, 136.00, 128.85, 128.39, 127.97, 127.84, 127.33, 126.73, 125.92, 122.25, 122.00, 119.44, 119.30, 117.43, 111.11, 56.99, 49.50, 15.09; MS (ESI-APCI) exact mass calculated for [M-SMe] ( $\text{C}_{22}\text{H}_{18}\text{N}$ ) requires  $m/z$  296.1, found  $m/z$  296.1;  $[\alpha]_D^{24} = +39.7$  ( $c = 0.62$ ,  $\text{CH}_2\text{Cl}_2$ ).

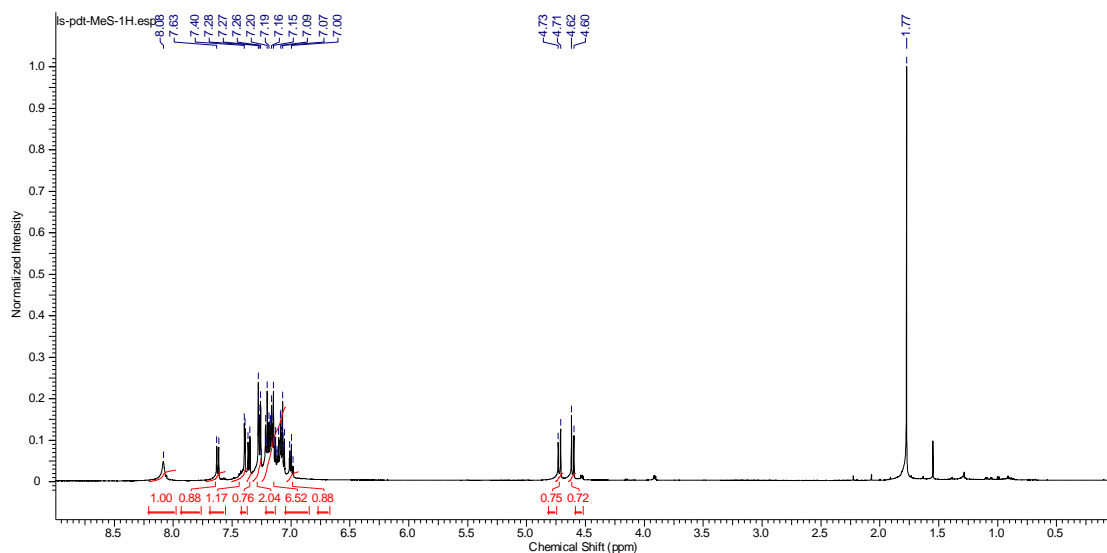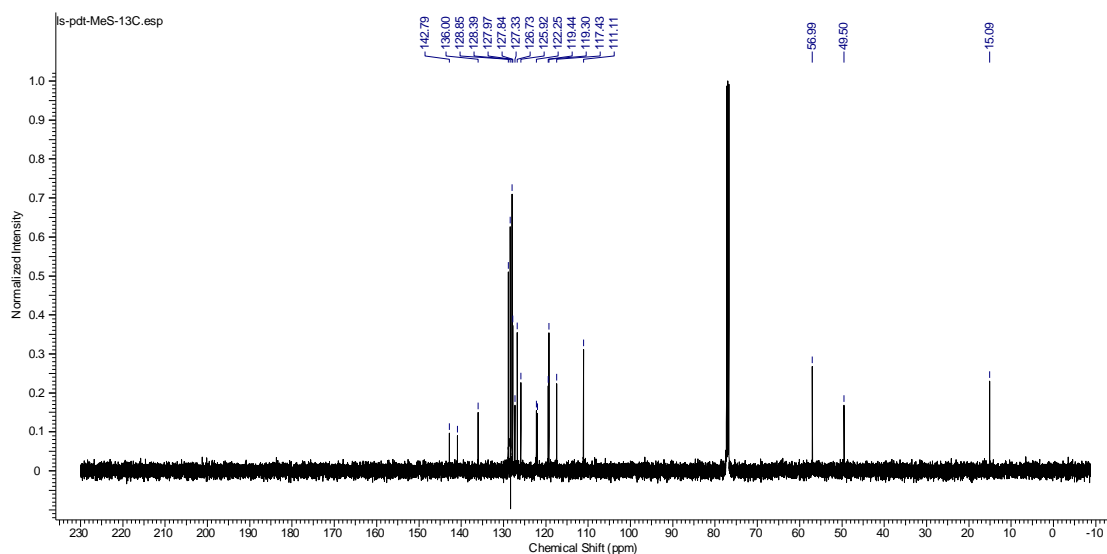

**Racemic sample:**

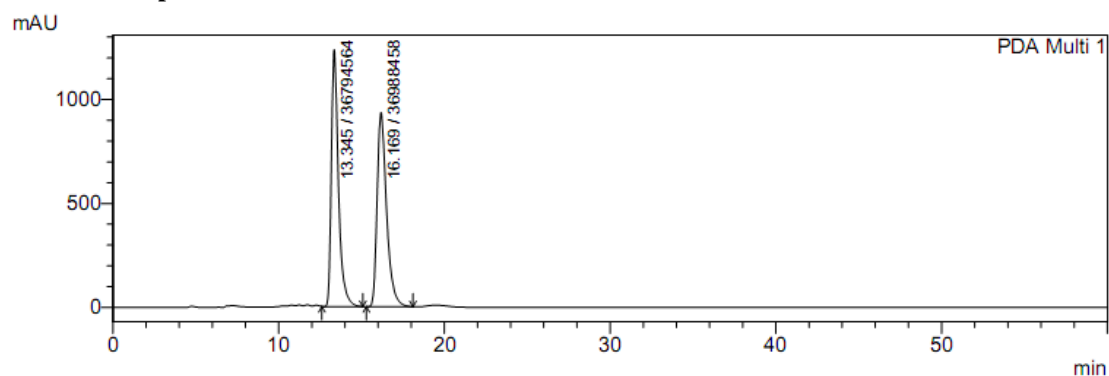

PDA Ch1 220nm 4nm

| Peak# | Ret. Time | Area     | Height  | Area %  | Height % |
|-------|-----------|----------|---------|---------|----------|
| 1     | 13.345    | 36794564 | 1234936 | 49.869  | 56.924   |
| 2     | 16.169    | 36988458 | 934504  | 50.131  | 43.076   |
| Total |           | 73783021 | 2169440 | 100.000 | 100.000  |

**Enantioenriched sample:**

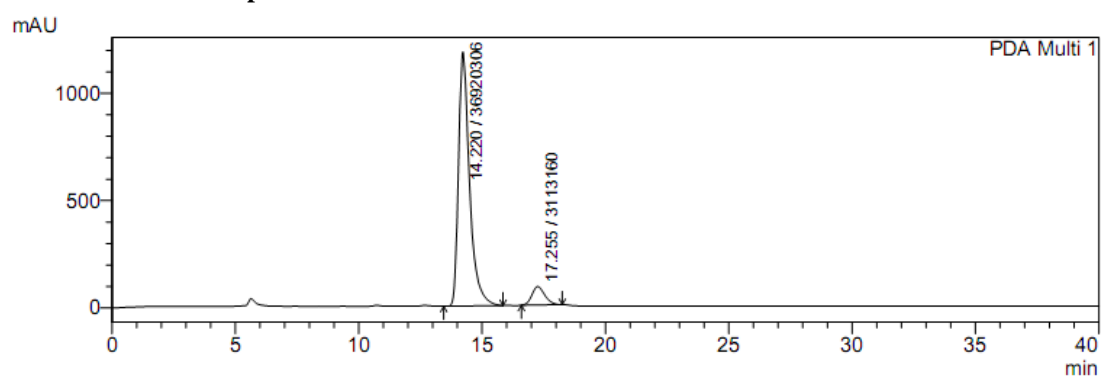

PDA Ch1 220nm 4nm

| Peak# | Ret. Time | Area     | Height  | Area %  | Height % |
|-------|-----------|----------|---------|---------|----------|
| 1     | 14.220    | 36920306 | 1183736 | 92.224  | 93.232   |
| 2     | 17.255    | 3113160  | 85937   | 7.776   | 6.768    |
| Total |           | 40033466 | 1269673 | 100.000 | 100.000  |



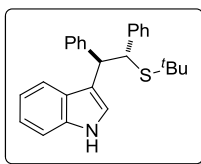

### 3-((1R,2R)-2-(tert-butylthio)-1,2-diphenylethyl)-1H-indole (**2h**)

Followed method B from **1h** (21.5 mg, 0.05 mmol), for 45 h, and purified using silica gel chromatography to give 17.2 mg (89% yield) of **2h** as a colorless gel.

This material was determined to be 87% ee by chiral HPLC analysis (ChiralPak AD-H, 5% *i*-PrOH, 1 mL/min, 300 nm,  $t_r$ (major) = 9 min,  $t_r$ (minor) = 10 min).

IR (Film): 3419 (s), 3026, 2960, 1600, 1491, 1455 (s), 1363, 1161, 1098, 909 (s), 738 (s), 697 (s)  $\text{cm}^{-1}$ ;  
 $^1\text{H}$  NMR: (500 MHz,  $\text{CDCl}_3$ )  $\delta$  8.03 (br. s., 1H), 7.44 (d,  $J=7.8$  Hz, 1H), 7.34 (d,  $J=8.2$  Hz, 1H), 7.31 (d,  $J=2.3$  Hz, 1H), 7.29 - 7.23 (m, 2H), 7.21 - 6.99 (m, 10H), 4.71 (d,  $J=7.8$  Hz, 1H), 4.66 (d,  $J=7.8$  Hz, 1H), 1.12 (s, 9H);  $^{13}\text{C}$  NMR: (125 MHz,  $\text{CDCl}_3$ )  $\delta$  143.68, 142.46, 135.91, 129.19, 129.05, 127.61, 127.50, 126.29, 125.97, 122.61, 121.81, 119.35, 119.25, 117.00, 110.92, 53.28, 50.49, 43.82, 31.32;  
 MS (ESI-APCI) exact mass calculated for  $[\text{M}-\text{S}^t\text{Bu}]$  ( $\text{C}_{22}\text{H}_{18}\text{N}$ ) requires  $m/z$  296.1, found  $m/z$  296.1;  
 $[\alpha]_D^{25} = +2.9$  ( $c = 0.1$ ,  $\text{CH}_2\text{Cl}_2$ ).

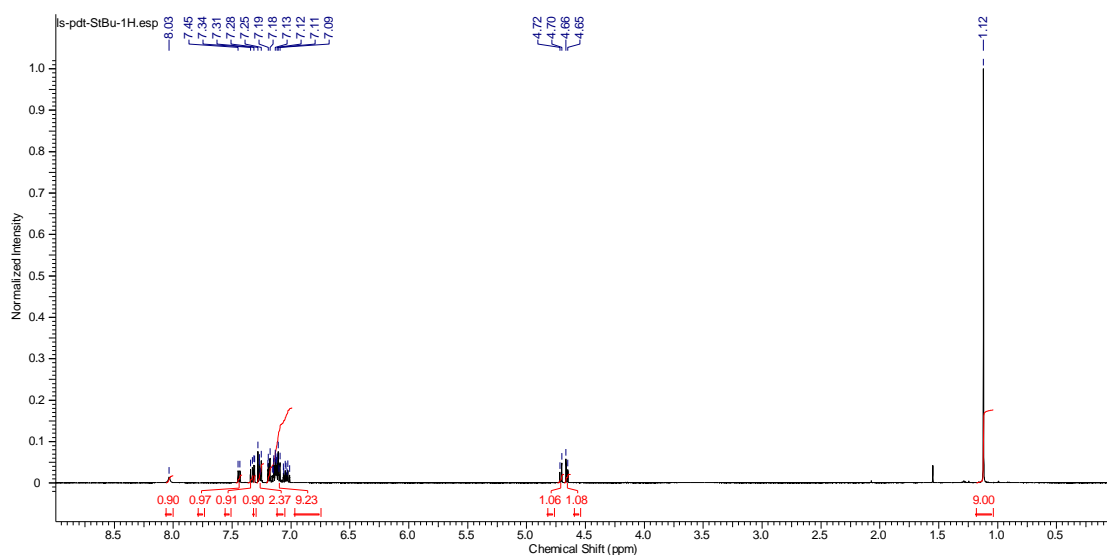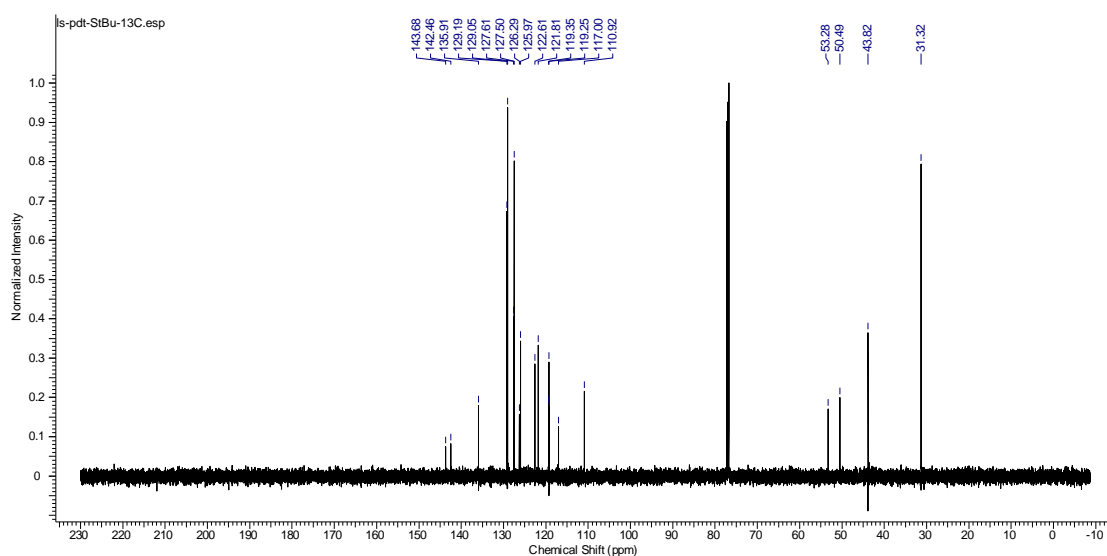

**Racemic sample:**

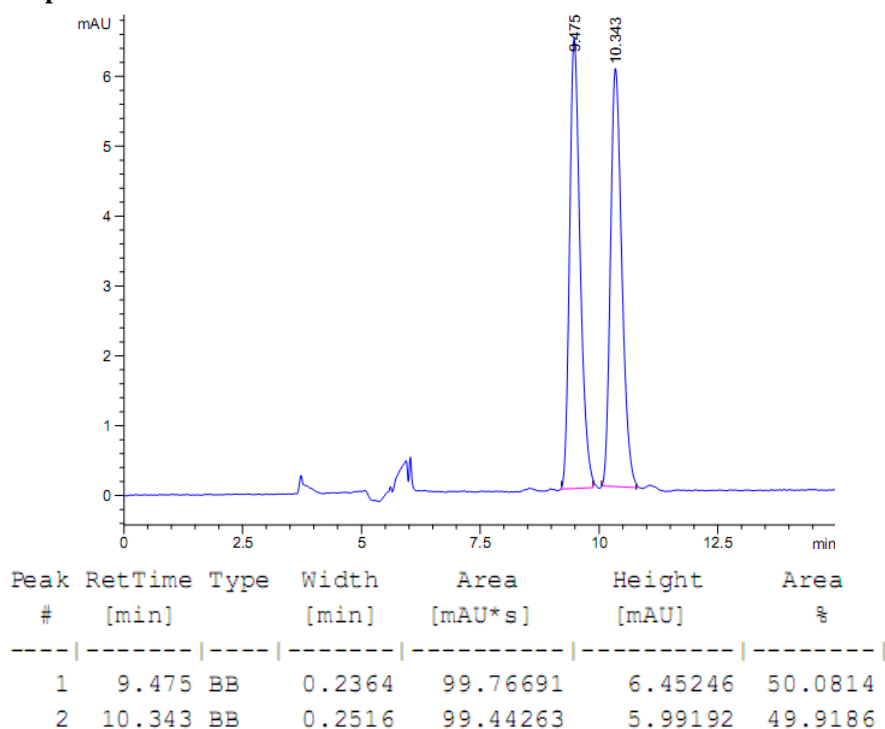

**Enantioenriched sample:**

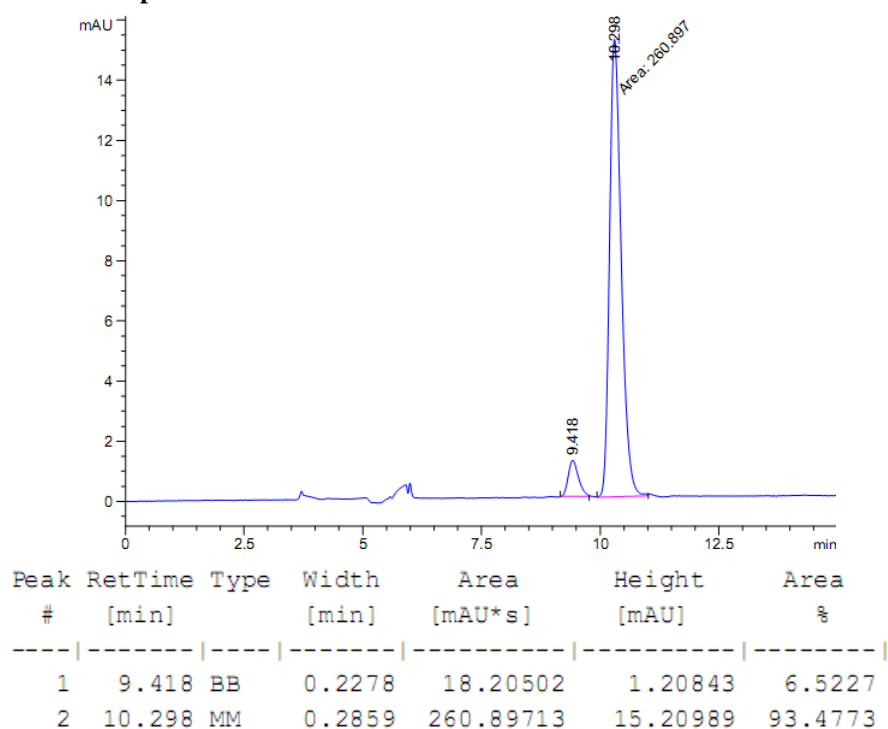

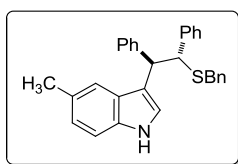

### 3-((1R,2R)-2-(benzylthio)-1,2-diphenylethyl)-5-methyl-1H-indole (**2i**)

Followed method B from **1a** (23.2 mg, 0.05 mmol), for 40 h, and purified using silica gel chromatography to give 20.3 mg (97% yield) of **2i** as a colorless gel. This material was determined to be 91% ee by chiral HPLC analysis (ChiralPak AD-H, 10% *i*-PrOH, 1 mL/min, 230 nm,  $t_r$ (major) = 15 min,  $t_r$ (minor) = 30 min). IR (Film): 3422 (s), 3026, 2914, 1492, 1452, 1098, 1072, 1029, 909, 696 (s)  $\text{cm}^{-1}$ ;  $^1\text{H}$  NMR: (500 MHz,  $\text{CDCl}_3$ )  $\delta$  7.90 (br. s., 1H), 7.31 - 7.08 (m, 12H), 7.05 (d,  $J=2.3$  Hz, 1H), 7.02 - 6.86 (m, 5H), 4.61 (d,  $J=10.5$  Hz, 1H), 4.42 (d,  $J=10.1$  Hz, 1H), 3.42 (d,  $J=13.7$  Hz, 1H), 3.24 (d,  $J=13.7$  Hz, 1H), 2.38 (s, 3H);  $^{13}\text{C}$  NMR: (125 MHz,  $\text{CDCl}_3$ )  $\delta$  153.80, 142.61, 140.96, 138.43, 131.16, 129.19, 129.05, 128.40, 128.23, 127.93, 127.74, 126.81, 126.77, 125.90, 123.24, 116.80, 111.91, 111.61, 101.48, 55.80, 54.03, 49.47, 35.80; MS (ESI-APCI) exact mass calculated for  $[\text{M}-\text{SBn}]$  ( $\text{C}_{23}\text{H}_{20}\text{N}$ ) requires  $m/z$  310.2, found  $m/z$  310.1;  $[\alpha]_D^{23} = +137.7$  ( $c = 1.0$ ,  $\text{CH}_2\text{Cl}_2$ ).

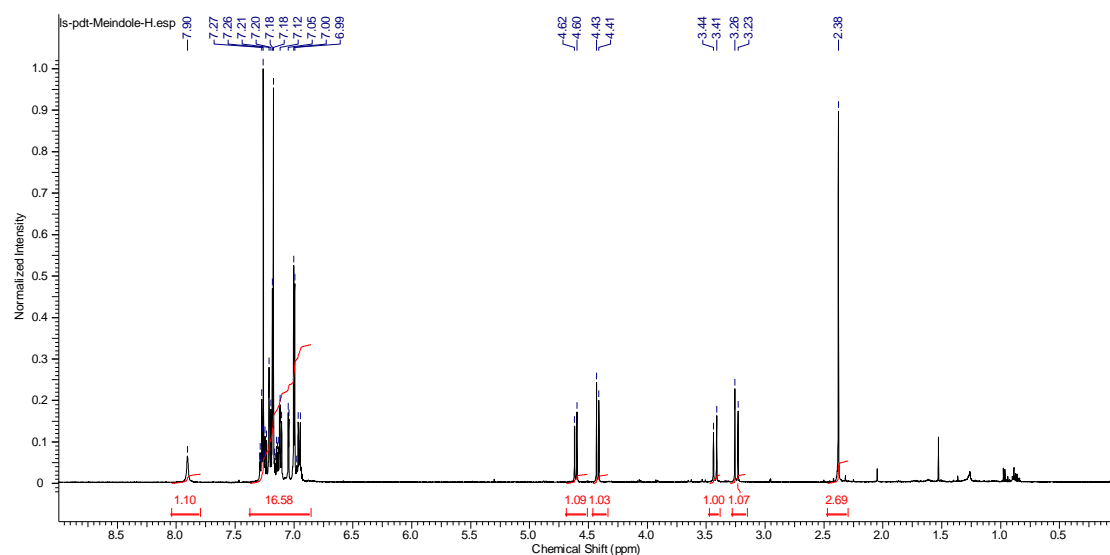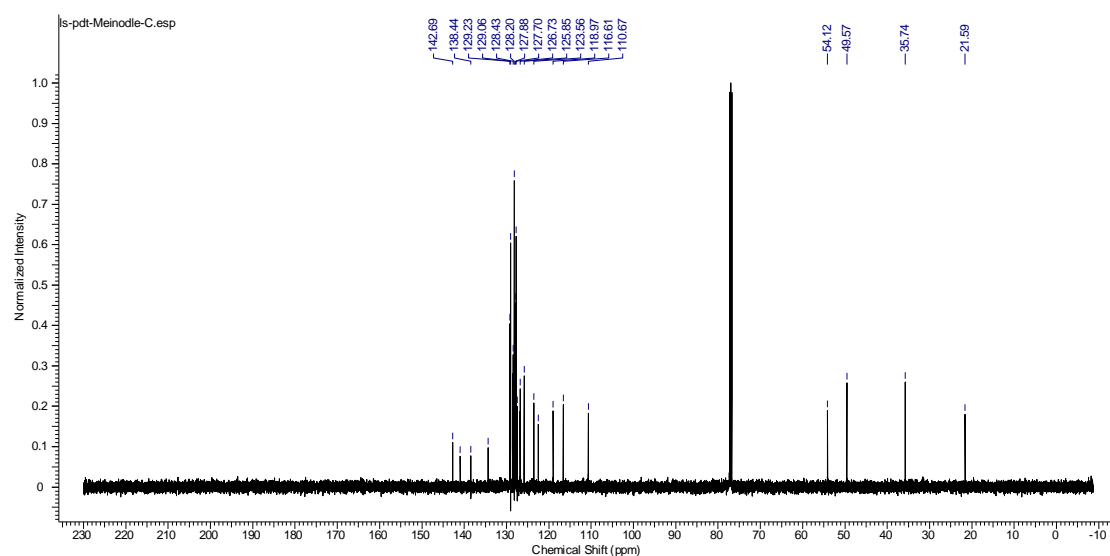

**Racemic sample:**

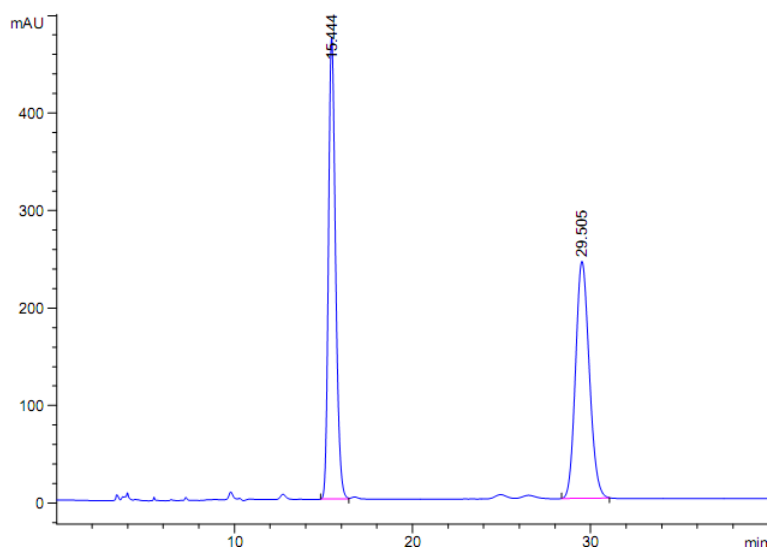

| Peak # | RetTime [min] | Type | Width [min] | Area [mAU*s] | Height [mAU] | Area %  |
|--------|---------------|------|-------------|--------------|--------------|---------|
| 1      | 15.444        | BB   | 0.4258      | 1.31458e4    | 473.62302    | 50.2057 |
| 2      | 29.505        | BB   | 0.8314      | 1.30381e4    | 243.23105    | 49.7943 |

**Enantioenriched sample:**

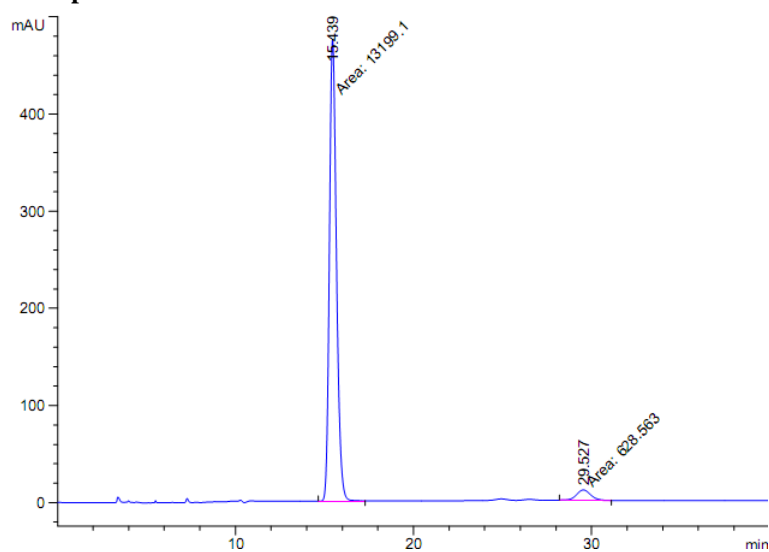

| Peak # | RetTime [min] | Type | Width [min] | Area [mAU*s] | Height [mAU] | Area %  |
|--------|---------------|------|-------------|--------------|--------------|---------|
| 1      | 15.439        | MM   | 0.4625      | 1.31991e4    | 475.67935    | 95.4543 |
| 2      | 29.527        | MM   | 0.9583      | 628.56317    | 10.93136     | 4.5457  |

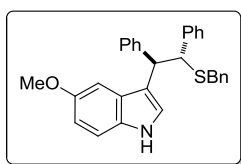

### 3-((1R,2R)-2-(benzylthio)-1,2-diphenylethyl)-5-methoxy-1H-indole (**2j**)

Followed method B from **1a** (23.2 mg, 0.05 mmol), for 40 h, and purified using silica gel chromatography to give 21.0 mg (93% yield) of **2j** as a colorless gel. This material was determined to be 93% ee by chiral HPLC analysis (ChiralPak AD-H, 15% *i*-PrOH, 1 mL/min, 230 nm,  $t_r$ (major) = 19 min,  $t_r$ (minor) = 27 min). IR (Film): 3421 (br), 3026, 2916, 1624, 1583, 1483, 1452 (s), 1208 (s), 1169, 1060, 1028, 929, 696 (s)  $\text{cm}^{-1}$ ;  $^1\text{H}$  NMR: (500 MHz,  $\text{CDCl}_3$ )  $\delta$  7.92 (br. s., 1H), 7.35 - 7.12 (m, 11H), 7.09 (d,  $J=2.4$  Hz, 1H), 7.06 - 7.00 (m, 4H), 6.98 (dd,  $J=3.9, 4.9$  Hz, 1H), 6.85 (d,  $J=2.4$  Hz, 1H), 6.81 (dd,  $J=2.4, 8.8$  Hz, 1H), 4.61 (d,  $J=10.3$  Hz, 1H), 4.44 (d,  $J=9.8$  Hz, 1H), 3.76 (s, 3H), 3.46 (d,  $J=13.7$  Hz, 1H), 3.28 (d,  $J=13.7$  Hz, 1H);  $^{13}\text{C}$  NMR: (125 MHz,  $\text{CDCl}_3$ )  $\delta$  153.80, 142.61, 140.96, 138.43, 131.16, 129.19, 129.05, 128.40, 128.23, 127.93, 127.74, 126.81, 126.77, 125.90, 123.24, 116.80, 111.91, 111.61, 101.48, 55.80, 54.03, 49.47, 35.80; MS (ESI-APCI) exact mass calculated for  $[\text{M}-\text{SBn}]$  ( $\text{C}_{23}\text{H}_{20}\text{NO}$ ) requires  $m/z$  326.2, found  $m/z$  326.1;  $[\alpha]_D^{24} = +155.4$  ( $c = 1.0, \text{CH}_2\text{Cl}_2$ ).

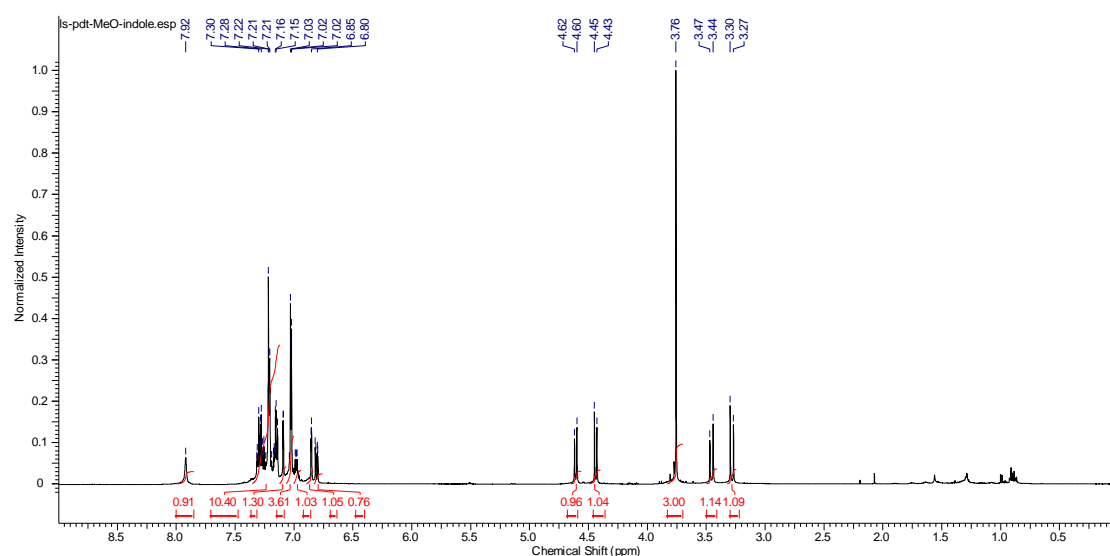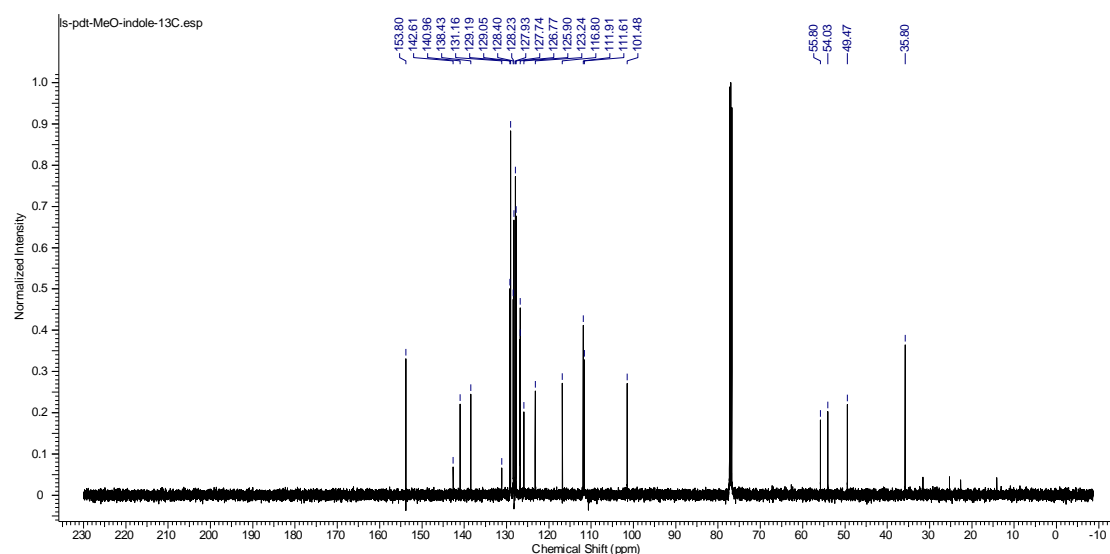

**Racemic sample:**

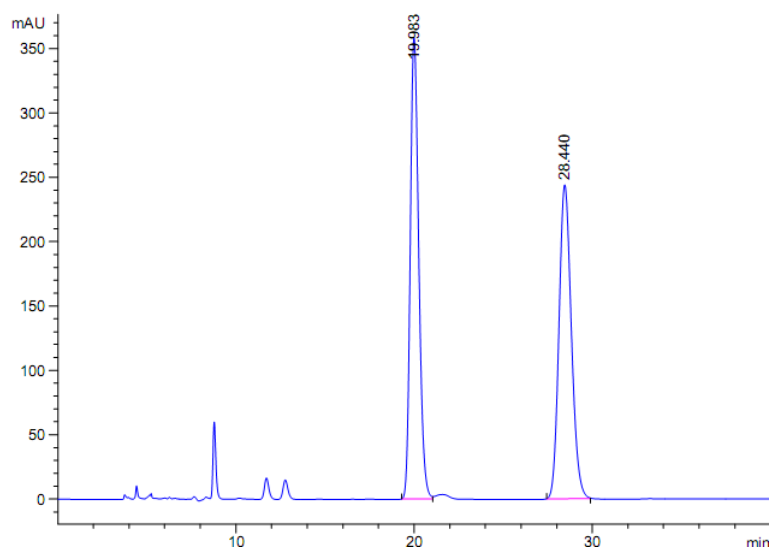

| Peak # | RetTime [min] | Type | Width [min] | Area [mAU*s] | Height [mAU] | Area %  |
|--------|---------------|------|-------------|--------------|--------------|---------|
| 1      | 19.983        | BB   | 0.5118      | 1.18664e4    | 358.87903    | 50.1918 |
| 2      | 28.440        | BB   | 0.7468      | 1.17757e4    | 244.10435    | 49.8082 |

**Enantioenriched sample:**

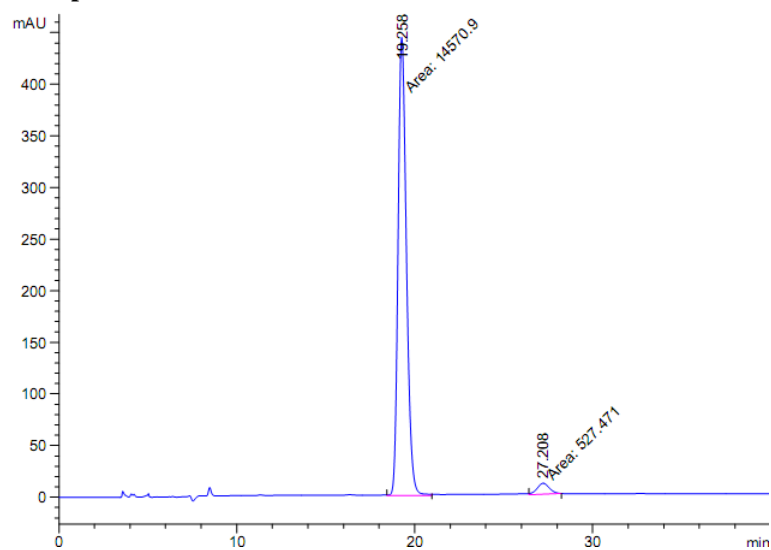

| Peak # | RetTime [min] | Type | Width [min] | Area [mAU*s] | Height [mAU] | Area %  |
|--------|---------------|------|-------------|--------------|--------------|---------|
| 1      | 19.258        | MM   | 0.5469      | 1.45709e4    | 444.07391    | 96.5064 |
| 2      | 27.208        | MM   | 0.8193      | 527.47144    | 10.72962     | 3.4936  |

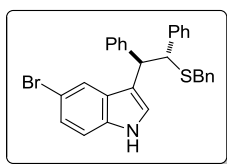

### 3-((1R,2R)-2-(benzylthio)-1,2-diphenylethyl)-5-bromo-1H-indole (**2k**)

Followed method B from **1a** (22.3 mg, 0.05 mmol), for 45 h, and purified using silica gel chromatography to give 20.8 mg (83% yield) of **2k** as a colorless gel. This material was determined to be 92% ee by chiral HPLC analysis (ChiralPak AD-H, 10% *i*-PrOH, 1 mL/min, 230 nm,  $t_r$ (major) = 14 min,  $t_r$ (minor) = 19 min). IR (Film): 3426 (s) 3027, 1492, 1453 (s), 1100, 909 (s) 727 (s), 696 (s)  $\text{cm}^{-1}$ ;  $^1\text{H}$  NMR: (500 MHz,  $\text{CDCl}_3$ )  $\delta$  7.97 (br. s., 1H), 7.47 (d,  $J=1.8$  Hz, 1H), 7.24 - 7.00 (m, 14H), 6.98 - 6.83 (m, 4H), 4.48 (d,  $J=10.1$  Hz, 1H), 4.30 (d,  $J=10.1$  Hz, 1H), 3.36 (d,  $J=13.7$  Hz, 1H), 3.18 (d,  $J=13.7$  Hz, 1H);  $^{13}\text{C}$  NMR: (125 MHz,  $\text{CDCl}_3$ )  $\delta$  142.47, 140.94, 138.51, 134.84, 129.38, 129.27, 128.57, 128.53, 128.25, 128.12, 127.18, 127.13, 126.35, 125.12, 123.86, 122.16, 117.18, 113.06, 112.72, 111.33, 54.24, 49.66, 36.00; MS (ESI-APCI) exact mass calculated for [M-SBn] ( $\text{C}_{27}\text{H}_{17}\text{BrN}$ ) requires  $m/z$  374.1 and 376.1, found  $m/z$  374.0 and 376.1;  $[\alpha]_D^{25} = +96.4$  ( $c = 1.0$ ,  $\text{CH}_2\text{Cl}_2$ ).

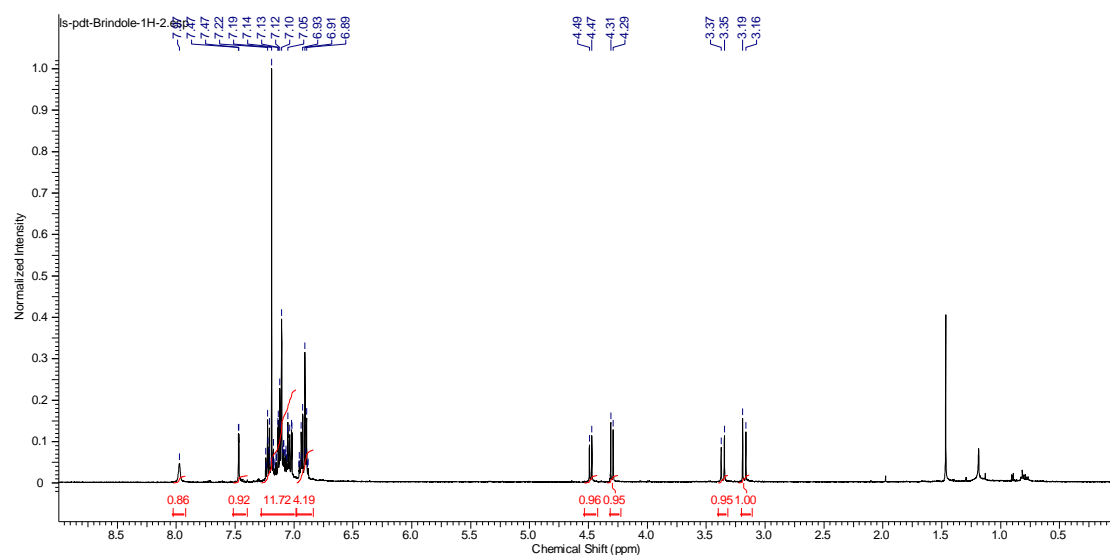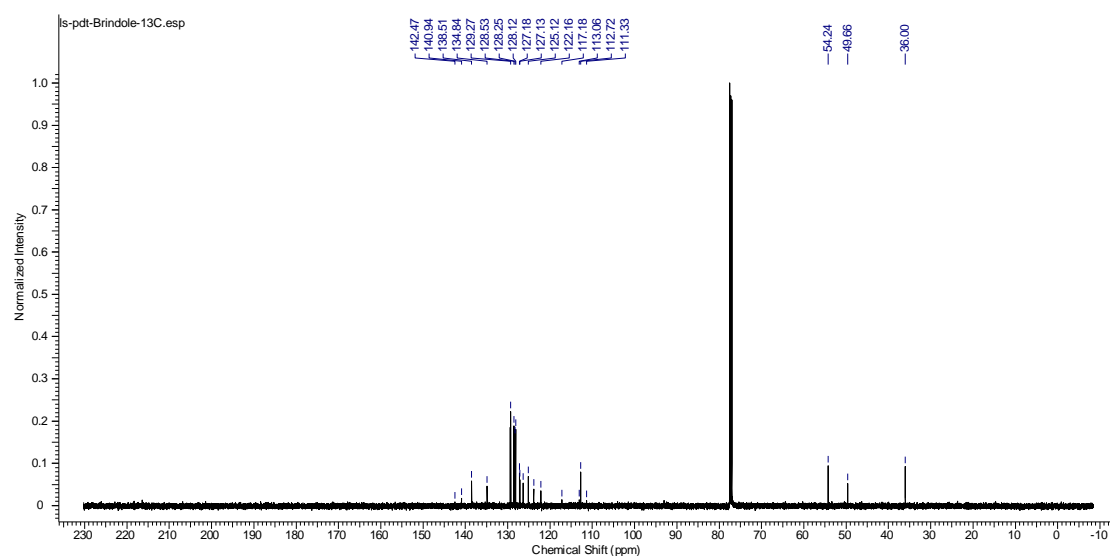

**Racemic sample:**

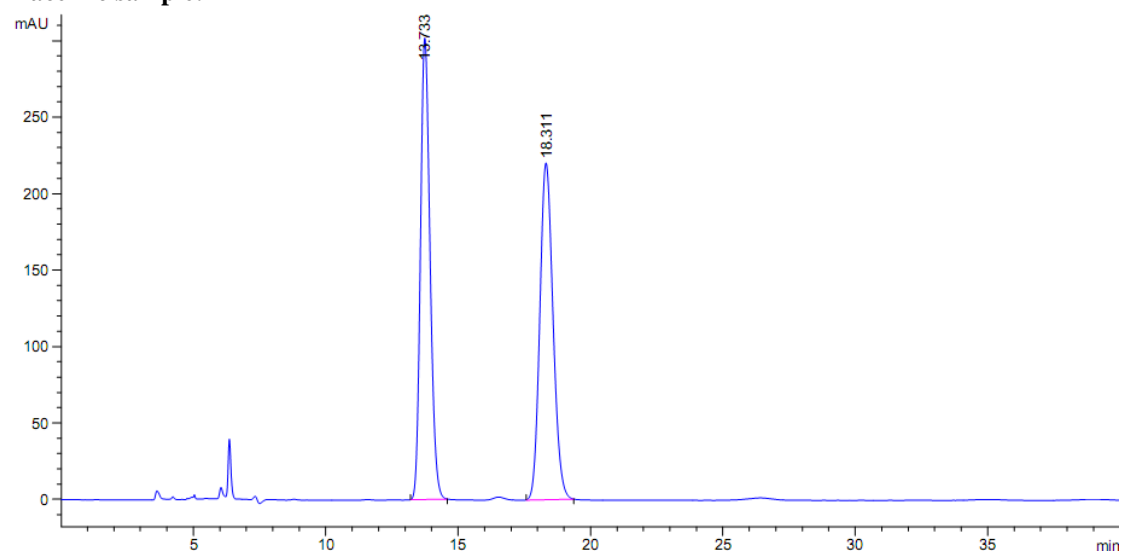

| Peak # | RetTime [min] | Type | Width [min] | Area [mAU*s] | Height [mAU] | Area %  |
|--------|---------------|------|-------------|--------------|--------------|---------|
| 1      | 13.733        | BB   | 0.3870      | 7585.60254   | 302.04462    | 49.8001 |
| 2      | 18.311        | BB   | 0.5368      | 7646.50195   | 220.39206    | 50.1999 |

**Enantioenriched sample:**

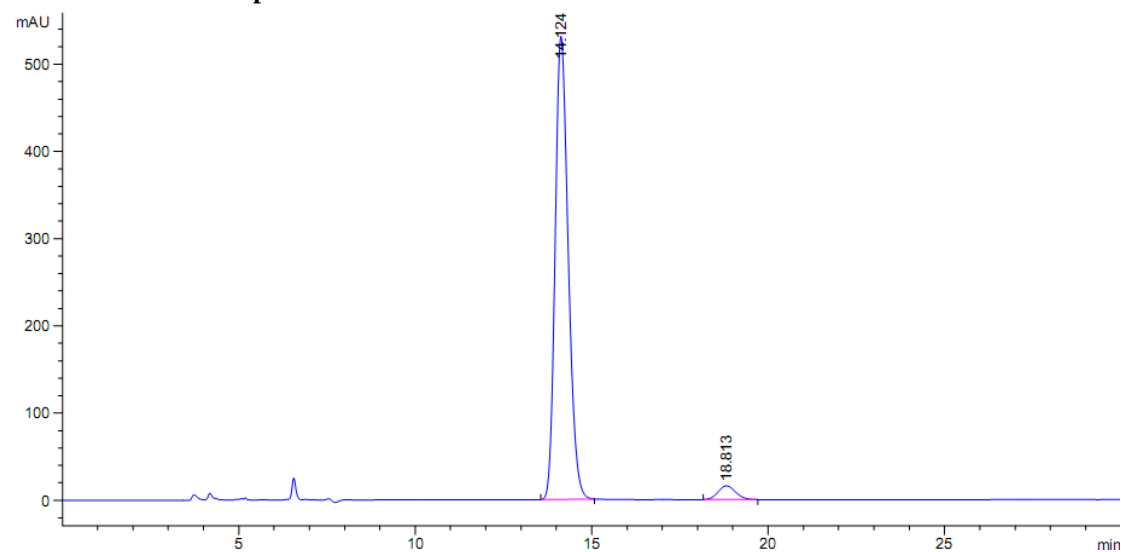

| Peak # | RetTime [min] | Type | Width [min] | Area [mAU*s] | Height [mAU] | Area %  |
|--------|---------------|------|-------------|--------------|--------------|---------|
| 1      | 14.124        | BB   | 0.3983      | 1.36673e4    | 530.99554    | 96.1073 |
| 2      | 18.813        | BB   | 0.5280      | 553.57196    | 15.90586     | 3.8927  |



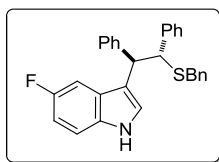

### 3-((1R,2R)-2-(benzylthio)-1,2-diphenylethyl)-5-fluoro-1H-indole (**21**)

Followed method B from **1a** (23.2 mg, 0.05 mmol), for 45 h, and purified using silica gel chromatography to give 19.3 mg (88% yield) of **21** as a colorless gel.

This material was determined to be 95% ee by chiral HPLC analysis (ChiralPak AD-H, 10% *i*-PrOH, 1 mL/min, 205 nm,  $t_r$ (major) = 21 min,  $t_r$ (minor) = 33 min). IR (Film): 3425 (br), 3027, 2919, 1628, 1581, 1484 (s), 1452 (s), 1242, 1162 (s), 1029, 939, 848, 796, 695 (s)  $\text{cm}^{-1}$ ;  $^1\text{H}$  NMR: (500 MHz,  $\text{CDCl}_3$ )  $\delta$  8.00 (br. s., 1H), 7.35 - 7.11 (m, 12H), 7.09 - 6.93 (m, 6H), 6.93 - 6.76 (m, 1H), 4.54 (d,  $J=10.1$  Hz, 1H), 4.40 (d,  $J=10.1$  Hz, 1H), 3.44 (d,  $J=13.7$  Hz, 1H), 3.26 (d,  $J=13.7$  Hz, 1H);  $^{13}\text{C}$  NMR: (125 MHz,  $\text{CDCl}_3$ )  $\delta$  157.54 (d,  $J=236.2$  Hz, 1C), 142.35, 140.77, 138.28, 132.51, 130.24, 129.13, 129.05, 128.28, 127.97, 127.82, 127.62, 126.89, 126.86, 126.03, 124.19, 117.27, 111.63, 111.55, 110.41, 110.20, 104.48, 104.30, 53.87, 49.61, 35.73; MS (ESI-APCI) exact mass calculated for [M-SBn] ( $\text{C}_{22}\text{H}_{17}\text{FN}$ ) requires  $m/z$  314.1, found  $m/z$  314.1;  $[\alpha]_D^{23} = +103$  ( $c = 1.0$ ,  $\text{CH}_2\text{Cl}_2$ ).

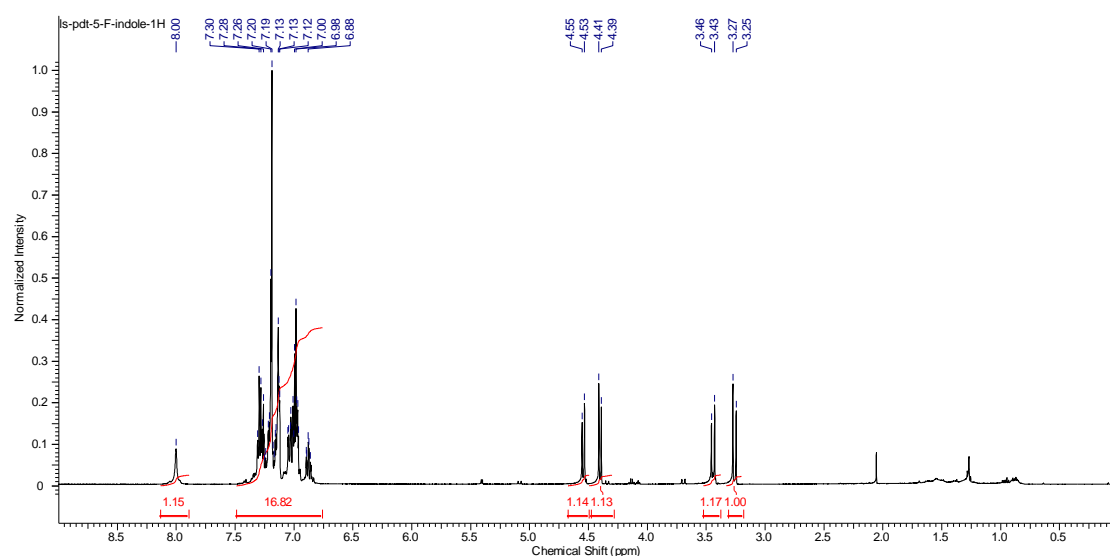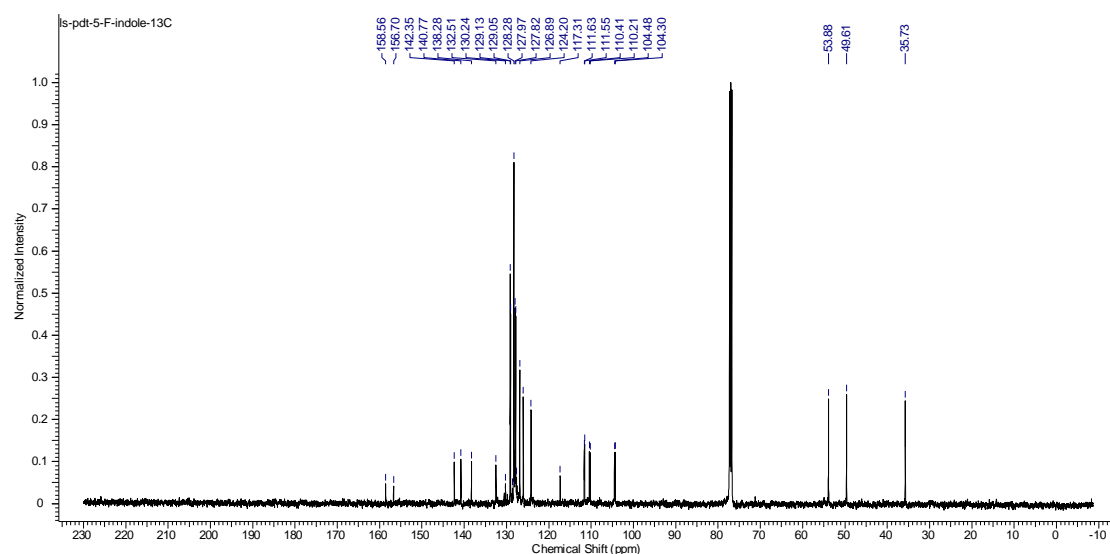

**Racemic sample:**

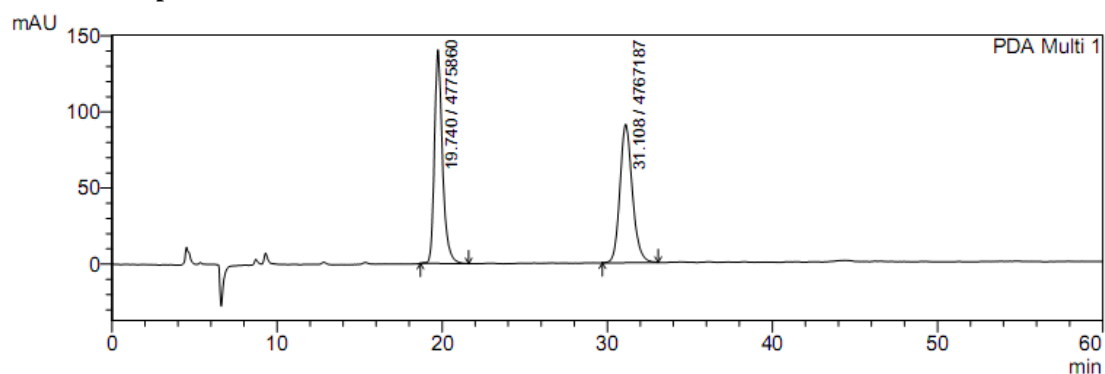

PDA Ch1 205nm 4nm

| Peak# | Ret. Time | Area    | Height | Area %  | Height % |
|-------|-----------|---------|--------|---------|----------|
| 1     | 19.740    | 4775860 | 140629 | 50.045  | 60.698   |
| 2     | 31.108    | 4767187 | 91056  | 49.955  | 39.302   |
| Total |           | 9543047 | 231685 | 100.000 | 100.000  |

**Enantioenriched sample:**

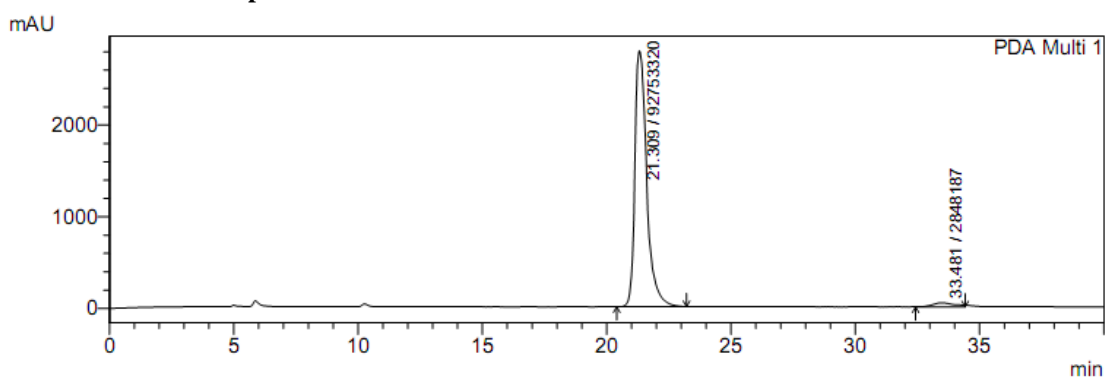

PDA Ch1 205nm 4nm

| Peak# | Ret. Time | Area     | Height  | Area %  | Height % |
|-------|-----------|----------|---------|---------|----------|
| 1     | 21.309    | 92753320 | 2793174 | 97.021  | 98.399   |
| 2     | 33.481    | 2848187  | 45438   | 2.979   | 1.601    |
| Total |           | 95601507 | 2838612 | 100.000 | 100.000  |

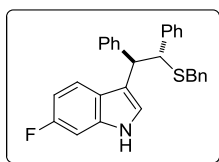

### 3-((1R,2R)-2-(benzylthio)-1,2-diphenylethyl)-6-fluoro-1H-indole (**2m**)

Followed method B from **1a** (23.2 mg, 0.25 mmol), for 43 h, and purified using silica gel chromatography to give 20.2 mg (92% yield) of **2m** as a colorless gel.

This material was determined to be 85% ee by chiral HPLC analysis (ChiralPak AD-H, 10% *i*-PrOH, 1 mL/min, 230 nm,  $t_r$ (major) = 19 min,  $t_r$ (minor) = 36 min). IR (Film): 3425 (s), 3027, 2916, 1627, 1600, 1548, 1494 (s), 1453 (s), 1343, 1255, 1138, 909, 801, 697 (s)  $\text{cm}^{-1}$ ;  $^1\text{H}$  NMR: (500 MHz,  $\text{CDCl}_3$ )  $\delta$  7.98 (br. s., 1H), 7.39 - 7.24 (m, 4H), 7.24 - 7.11 (m, 7H), 7.11 - 6.93 (m, 7H), 6.84 - 6.71 (m, 1H), 4.60 (d,  $J=10.5$  Hz, 1H), 4.42 (d,  $J=10.1$  Hz, 1H), 3.46 (d,  $J=13.3$  Hz, 1H), 3.27 (d,  $J=13.3$  Hz, 1H);  $^{13}\text{C}$  NMR: (125 MHz,  $\text{CDCl}_3$ )  $\delta$  160.13 (d,  $J=236.2$  Hz, 1C), 142.70, 141.05, 138.60, 136.21, 136.12, 129.41, 129.35, 128.57, 128.53, 128.22, 128.06, 127.14, 127.09, 126.28, 124.08, 122.93, 122.90, 120.45, 120.37, 117.49, 108.51, 108.32, 97.65, 97.44, 54.21, 49.84, 36.01; MS (ESI-APCI) exact mass calculated for [M-SBn] ( $\text{C}_{22}\text{H}_{17}\text{FN}$ ) requires  $m/z$  314.1, found  $m/z$  314.1;  $[\alpha]_D^{25} = +115$  ( $c = 1.0$ ,  $\text{CH}_2\text{Cl}_2$ ).

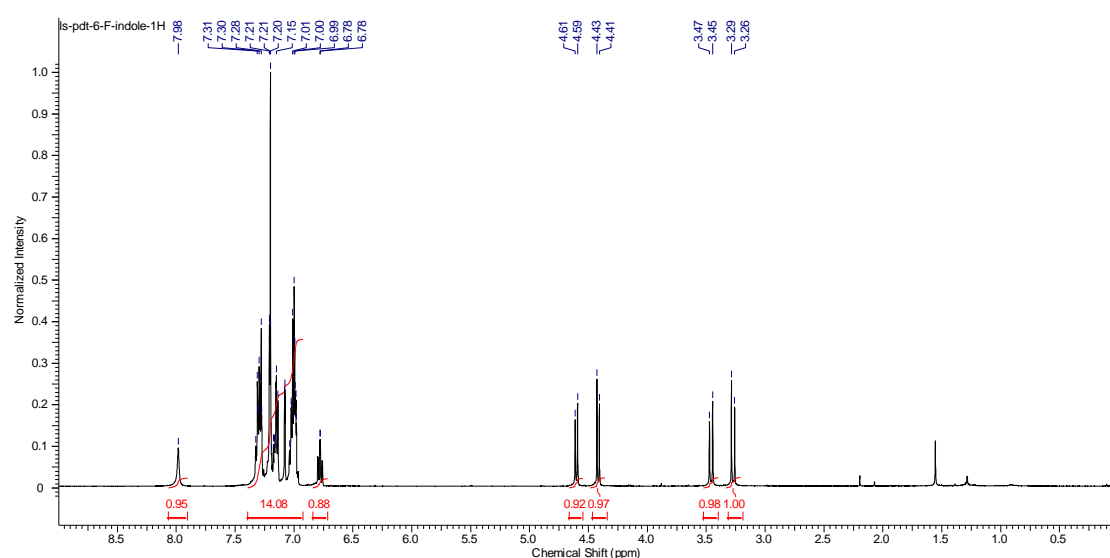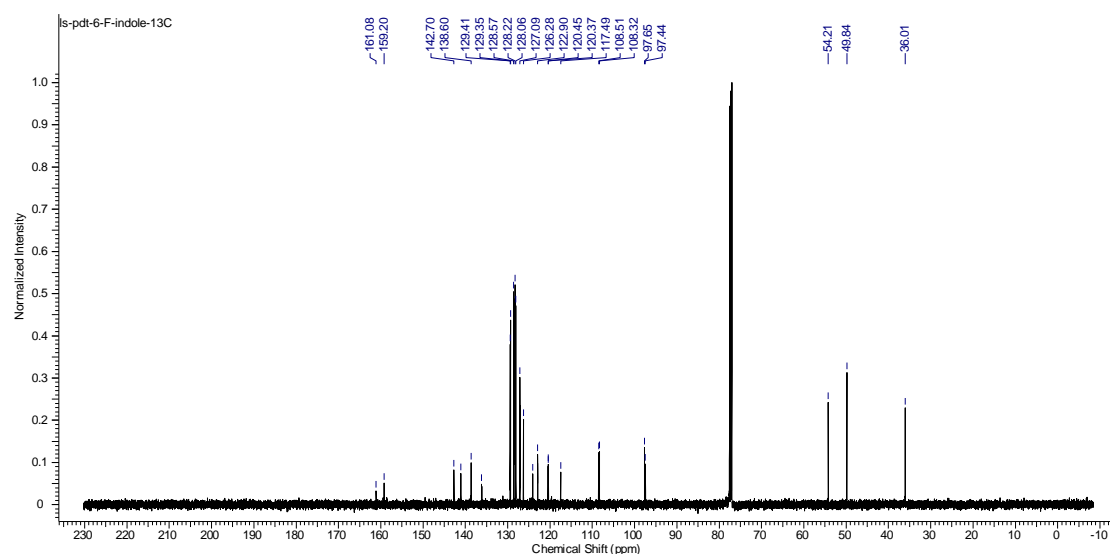

**Racemic sample:**

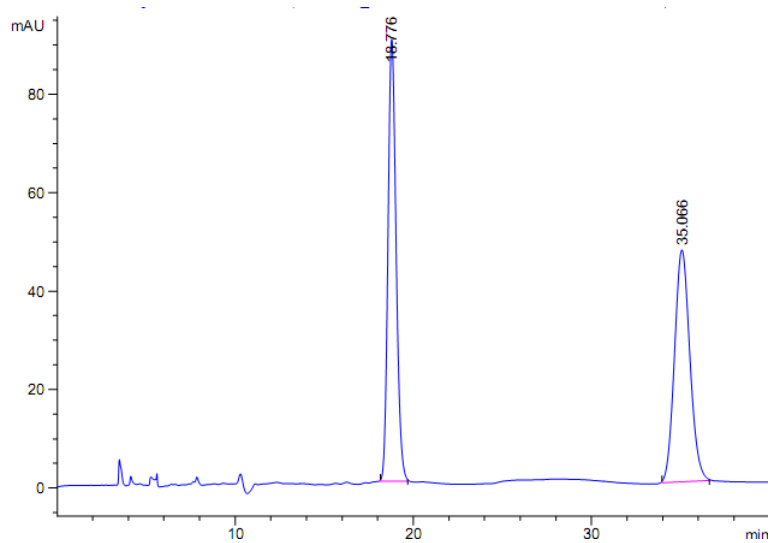

| Peak # | RetTime [min] | Type | Width [min] | Area [mAU*s] | Height [mAU] | Area %  |
|--------|---------------|------|-------------|--------------|--------------|---------|
| 1      | 18.776        | BB   | 0.4888      | 2839.37500   | 89.82629     | 50.1542 |
| 2      | 35.066        | BB   | 0.9190      | 2821.91846   | 47.10143     | 49.8458 |

**Enantioenriched sample:**

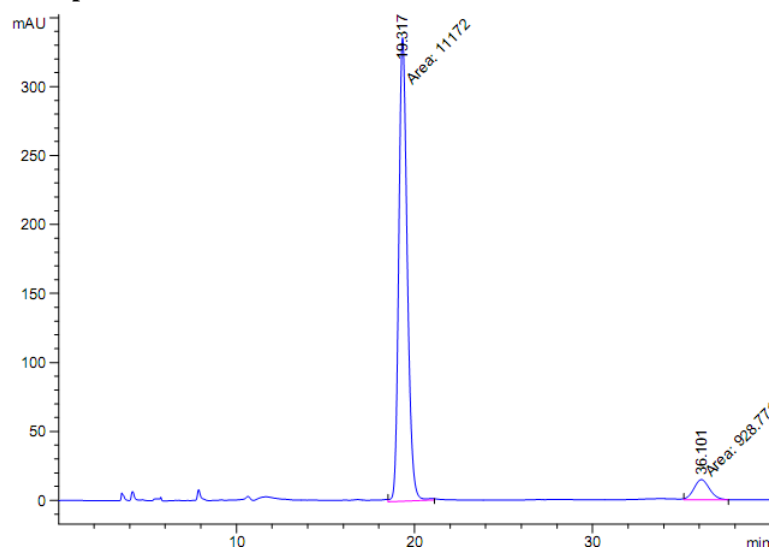

| Peak # | RetTime [min] | Type | Width [min] | Area [mAU*s] | Height [mAU] | Area %  |
|--------|---------------|------|-------------|--------------|--------------|---------|
| 1      | 19.317        | MM   | 0.5537      | 1.11720e4    | 336.29120    | 92.3247 |
| 2      | 36.101        | MM   | 1.0444      | 928.77069    | 14.82167     | 7.6753  |

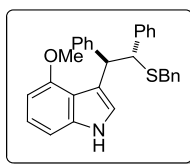

### 3-((1R,2R)-2-(benzylthio)-1,2-diphenylethyl)-4-methoxy-1H-indole (**2n**)

Followed method B from **1a** (23.2 mg, 0.05 mmol), for 43 h, and purified using silica gel chromatography to give 18.6 mg (83% yield) of **2n** as a colorless gel.

This material was determined to be 91% ee by chiral HPLC analysis (ChiralPak AD-H, 10% *i*-PrOH, 1 mL/min, 230 nm,  $t_r$ (major) = 15 min,  $t_r$ (minor) = 19 min).

IR (Film): 3422 (s), 3027, 2929, 1584, 1507, 1452, 1361, 1261 (s), 1091 (s) 1029, 732, 697 (s)  $\text{cm}^{-1}$ ;  $^1\text{H}$  NMR: (500 MHz,  $\text{CDCl}_3$ )  $\delta$  7.97 (br. s., 1H), 7.32 - 7.20 (m, 6H), 7.20 - 7.08 (m, 8H), 7.01 (s, 1H), 6.96 (s, 2H), 6.94 - 6.85 (m, 2H), 6.40 (d,  $J=7.9$  Hz, 1H), 3.77 (s, 2H), 3.44 (d,  $J=13.8$  Hz, 1H), 3.26 (d,  $J=13.8$  Hz, 1H);  $^{13}\text{C}$  NMR: (125 MHz,  $\text{CDCl}_3$ )  $\delta$  142.79, 140.89, 136.00, 128.85, 128.39, 127.97, 127.84, 127.33, 126.73, 125.92, 122.25, 122.01, 119.44, 119.30, 117.43, 111.11, 56.99, 49.50, 15.09; MS (ESI-APCI) exact mass calculated for [M-SBn] ( $\text{C}_{23}\text{H}_{20}\text{NO}$ ) requires  $m/z$  326.2, found  $m/z$  326.1;  $[\alpha]_D^{25} = +162.8$  ( $c = 1.0$ ,  $\text{CH}_2\text{Cl}_2$ ).

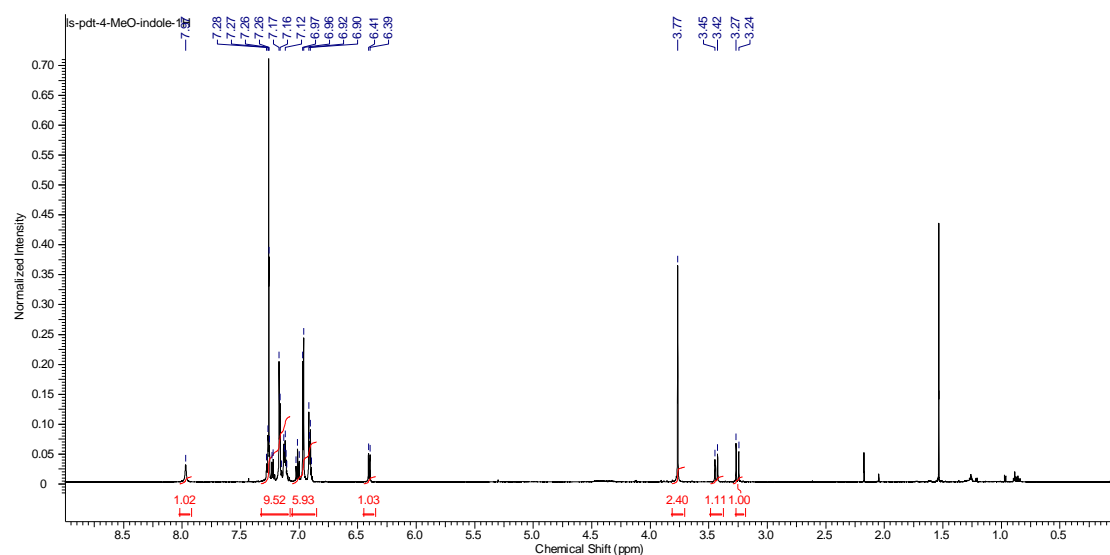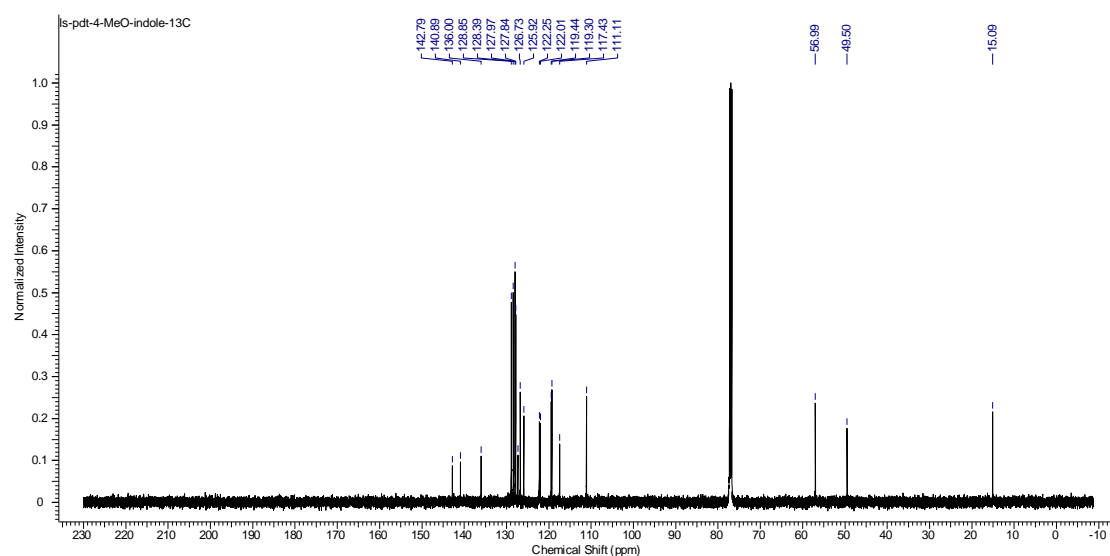

**Racemic sample:**

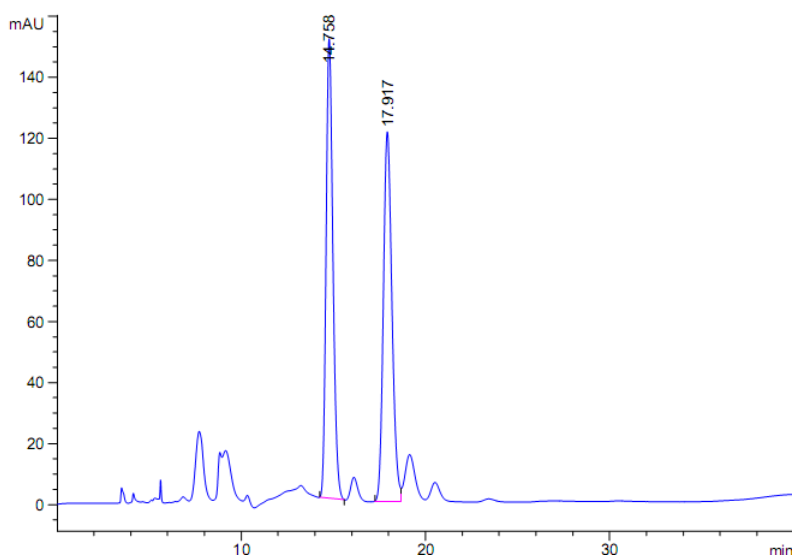

| Peak # | RetTime [min] | Type | Width [min] | Area [mAU*s] | Height [mAU] | Area %  |
|--------|---------------|------|-------------|--------------|--------------|---------|
| 1      | 14.758        | BB   | 0.3964      | 3877.78442   | 150.61403    | 49.7003 |
| 2      | 17.917        | BV   | 0.4999      | 3924.55688   | 121.16393    | 50.2997 |

**Enantioenriched sample:**

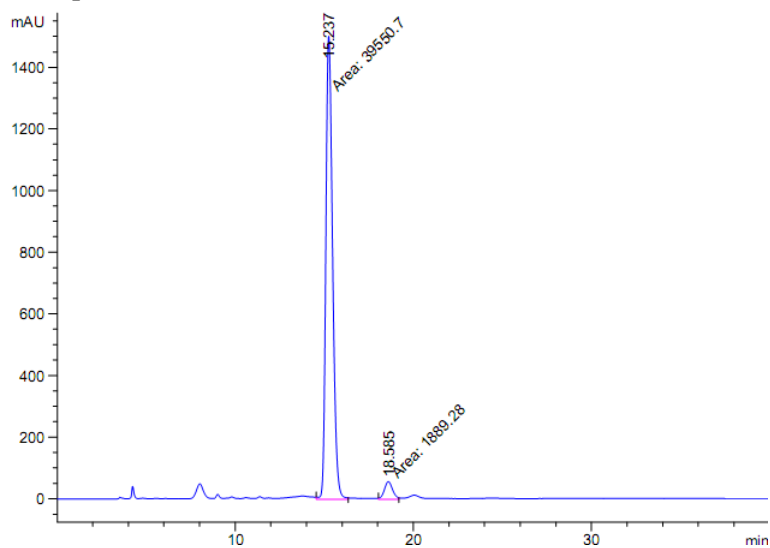

| Peak # | RetTime [min] | Type | Width [min] | Area [mAU*s] | Height [mAU] | Area %  |
|--------|---------------|------|-------------|--------------|--------------|---------|
| 1      | 15.237        | MM   | 0.4385      | 3.95507e4    | 1503.13428   | 95.4409 |
| 2      | 18.585        | MM   | 0.5456      | 1889.28296   | 57.71386     | 4.5591  |

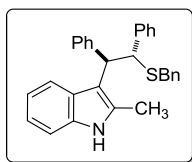

### 3-((1R,2R)-2-(benzylthio)-1,2-diphenylethyl)-2-methyl-1H-indole (**2o**)

Followed method B from **1a** (23.2 mg, 0.05 mmol), for 63 h, and purified using silica gel chromatography to give 20.5 mg (95% yield) of **2o** as a colorless gel.

This material was determined to be 78% ee by chiral HPLC analysis (ChiralPak AD-H, 10% *i*-PrOH, 1 mL/min, 230 nm,  $t_r$ (major) = 12 min,  $t_r$ (minor) = 17 min).

IR (Film): 3407 (br), 3026, 2972, 2921, 1492, 1453 (s), 1379, 1303, 1163, 950, 740, 697 (s)  $\text{cm}^{-1}$ ;  $^1\text{H}$  NMR: (500 MHz,  $\text{CDCl}_3$ )  $\delta$  7.74 (br. s., 1H), 7.44 (d,  $J=8.3$  Hz, 1H), 7.37 - 7.14 (m, 9H), 7.14 - 6.90 (m, 9H), 4.73 (d,  $J=10.7$  Hz, 1H), 4.54 (d,  $J=10.7$  Hz, 1H), 3.37 (d,  $J=13.7$  Hz, 1H), 3.18 (d,  $J=13.7$  Hz, 1H), 2.33 (s, 3H);  $^{13}\text{C}$  NMR: (125 MHz,  $\text{CDCl}_3$ )  $\delta$  142.94, 141.60, 138.12, 135.14, 132.05, 129.19, 129.12, 128.12, 128.11, 128.07, 127.91, 127.75, 126.84, 126.67, 125.65, 120.75, 119.86, 119.27, 112.23, 110.29, 53.06, 49.86, 35.41, 12.44; MS (ESI-APCI) exact mass calculated for  $[\text{M-SBn}]$  ( $\text{C}_{23}\text{H}_{20}\text{N}$ ) requires  $m/z$  310.2, found  $m/z$  310.1;  $[\alpha]_D^{25} = +57.5$  ( $c = 0.65$ ,  $\text{CH}_2\text{Cl}_2$ ).

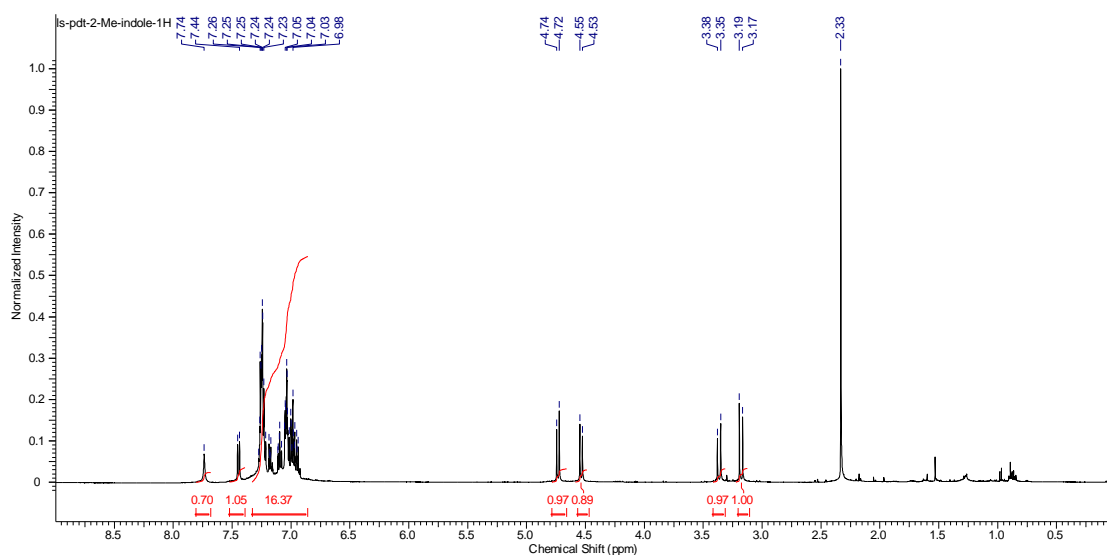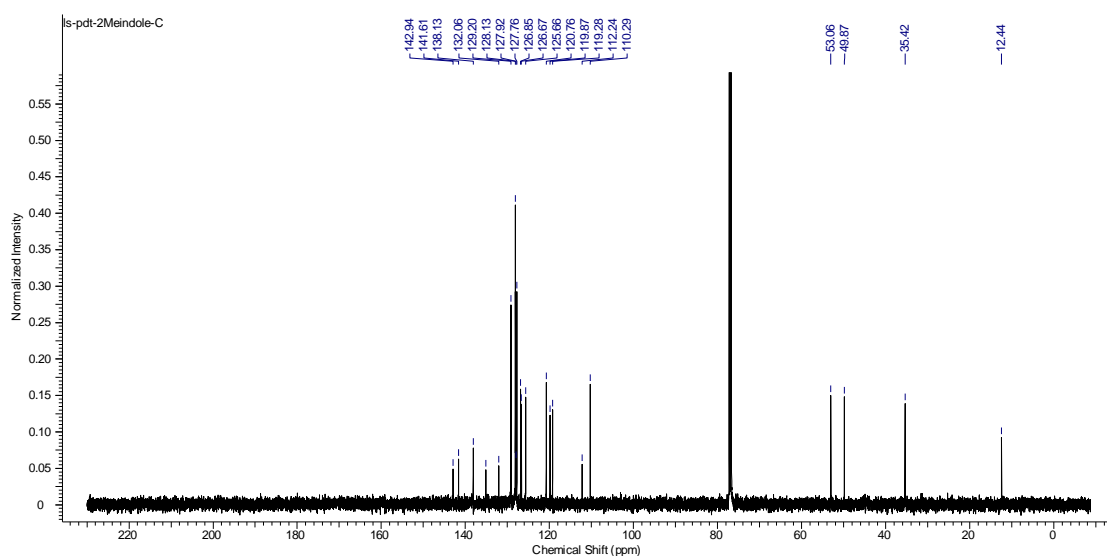

**Racemic sample:**

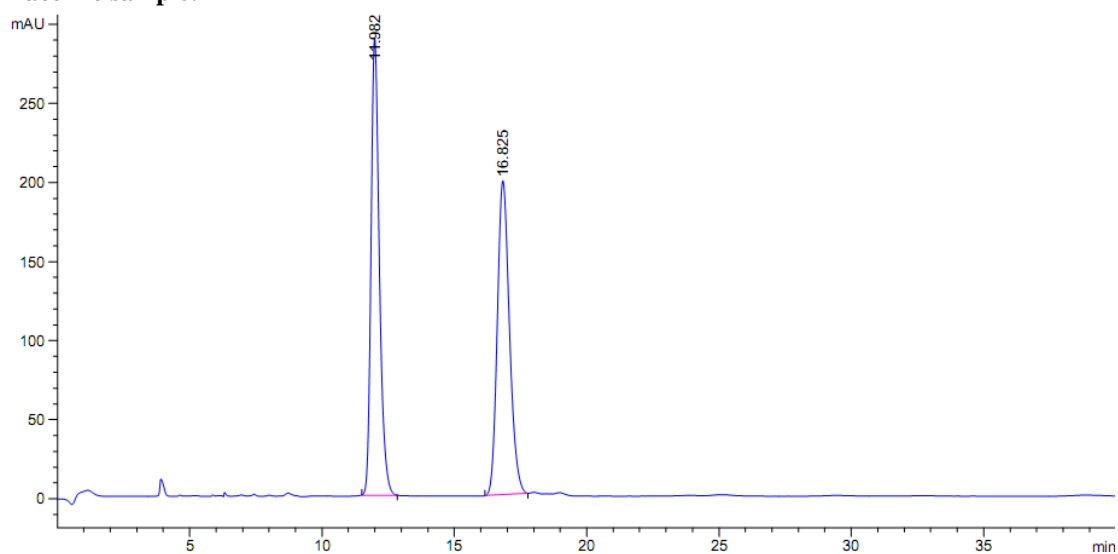

| Peak # | RetTime [min] | Type | Width [min] | Area [mAU*s] | Height [mAU] | Area %  |
|--------|---------------|------|-------------|--------------|--------------|---------|
| 1      | 11.982        | BB   | 0.3332      | 6328.65430   | 289.30783    | 50.0511 |
| 2      | 16.825        | BB   | 0.4890      | 6315.72803   | 198.62007    | 49.9489 |

**Enantioenriched sample:**

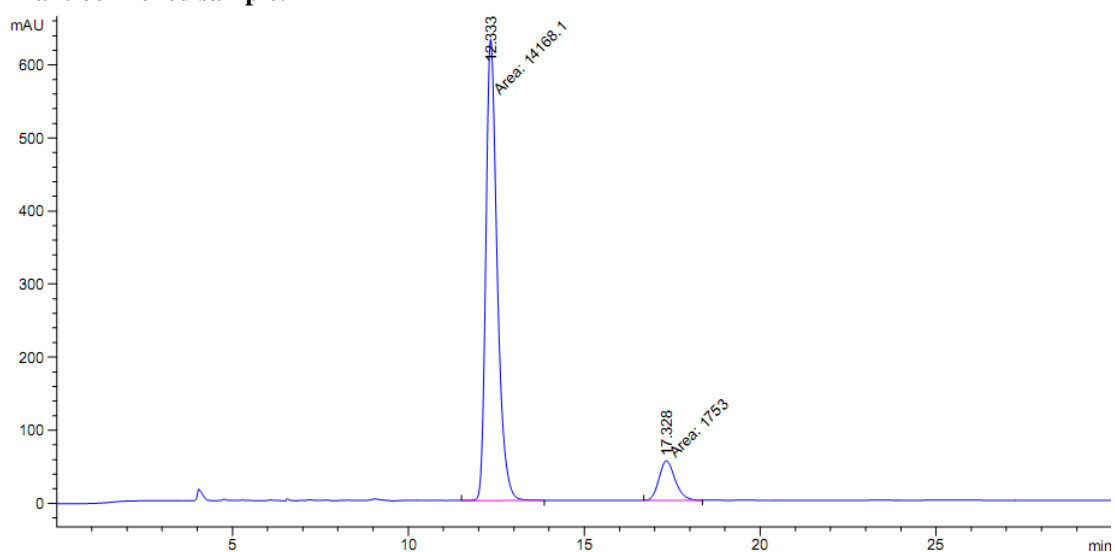

| Peak # | RetTime [min] | Type | Width [min] | Area [mAU*s] | Height [mAU] | Area %  |
|--------|---------------|------|-------------|--------------|--------------|---------|
| 1      | 12.333        | MM   | 0.3741      | 1.41681e4    | 631.17719    | 88.9894 |
| 2      | 17.328        | MM   | 0.5380      | 1753.00061   | 54.30894     | 11.0106 |



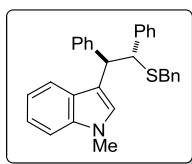

### 3-((1R,2R)-2-(benzylthio)-1,2-diphenylethyl)-1-methyl-1H-indole (**2p**)

Followed method B from **1a** (23.2 mg, 0.05 mmol), for 45 h, and purified using silica gel chromatography to give 11.8 mg (54% yield) of **2p** as a colorless gel.

This material was determined to be 3% ee by chiral HPLC analysis (ChiralPak OD-H, 5% *i*-PrOH, 1 mL/min, 220 nm,  $t_r$ (major) = 9 min,  $t_r$ (minor) = 10 min). IR

(Film): 3062, 2915, 1599, 1491, 1452, 1373, 1329, 1154, 1071, 1029, 735 (s), 697 (s)  $\text{cm}^{-1}$ ;  $^1\text{H}$  NMR: (500 MHz,  $\text{CDCl}_3$ )  $\delta$  7.42 (d,  $J=7.8$  Hz, 1H), 7.36 - 7.12 (m, 12H), 7.06 - 6.92 (m, 6H), 6.87 (s, 1H), 4.62 (d,  $J=10.5$  Hz, 1H), 4.43 (d,  $J=10.5$  Hz, 1H), 3.74 (s, 3H), 3.45 (d,  $J=13.7$  Hz, 1H), 3.27 (d,  $J=13.7$  Hz, 1H);  $^{13}\text{C}$  NMR: (125 MHz,  $\text{CDCl}_3$ )  $\delta$  142.95, 141.12, 138.47, 136.77, 129.16, 128.33, 128.21, 127.88, 127.72, 127.68, 127.09, 126.75, 125.79, 121.36, 119.50, 118.77, 115.52, 109.08, 54.08, 49.54, 35.73, 32.78; MS (ESI-APCI) exact mass calculated for [M-SBn] ( $\text{C}_{23}\text{H}_{20}\text{N}$ ) requires  $m/z$  310.2, found  $m/z$  310.2.

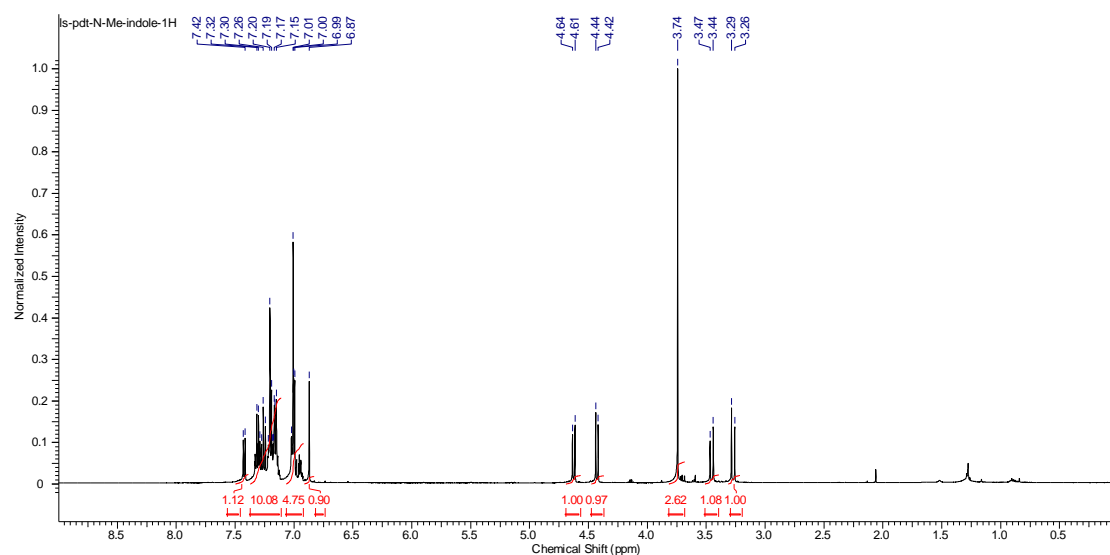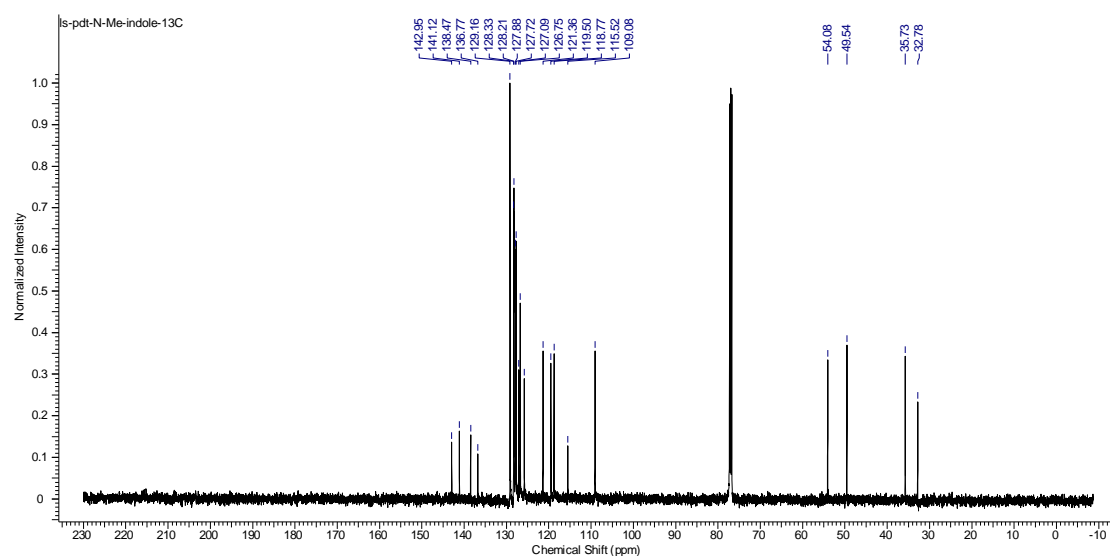

**Racemic sample:**

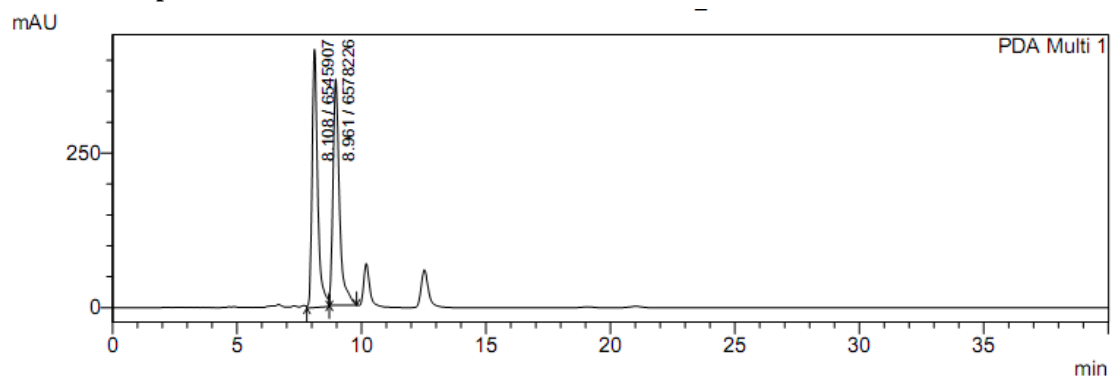

PDA Ch1 220nm 4nm

| Peak# | Ret. Time | Area     | Height | Area %  | Height % |
|-------|-----------|----------|--------|---------|----------|
| 1     | 8.108     | 6545907  | 417951 | 49.877  | 53.336   |
| 2     | 8.961     | 6578226  | 365664 | 50.123  | 46.664   |
| Total |           | 13124133 | 783616 | 100.000 | 100.000  |

**Enantioenriched sample:**

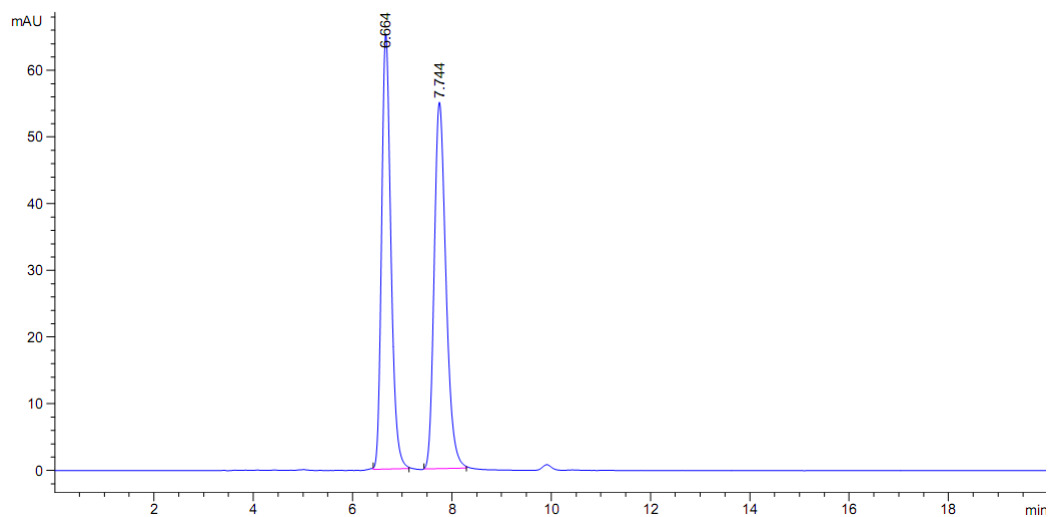

| Peak # | RetTime [min] | Type | Width [min] | Area [mAU*s] | Height [mAU] | Area %  |
|--------|---------------|------|-------------|--------------|--------------|---------|
| 1      | 6.664         | BB   | 0.1999      | 850.01630    | 65.27489     | 48.4316 |
| 2      | 7.744         | BB   | 0.2520      | 905.07043    | 54.99098     | 51.5684 |

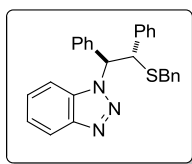

### 1-((1S,2S)-2-(benzylthio)-1,2-diphenylethyl)-1H-benzo[d][1,2,3]triazole (**2q**)

Followed method B from **1a** (22.3 mg, 0.05 mmol), for 63 h, and purified using silica gel chromatography to give 19.3 mg (92% yield) of **2q** as a colorless gel.

This material was determined to be 80% ee by chiral HPLC analysis (ChiralPak AD-H, 15% *i*-PrOH, 1 mL/min, 230 nm,  $t_r$ (major) = 33 min,  $t_r$ (minor) = 21 min).

IR (Film): 3029, 2923, 1492, 1452 (s), 1241, 1070, 910, 743, 723, 695 (s)  $\text{cm}^{-1}$ ;  $^1\text{H}$  NMR: (500 MHz,  $\text{CDCl}_3$ )  $\delta$  8.11 (d,  $J=8.2$  Hz, 1H), 7.56 (d,  $J=8.2$  Hz, 1H), 7.49 (d,  $J=7.3$  Hz, 1H), 7.43 - 7.34 (m, 1H), 7.34 - 7.14 (m, 10H), 7.14 - 6.97 (m, 5H), 6.00 (d,  $J=11.4$  Hz, 1H), 5.21 (d,  $J=11.4$  Hz, 1H), 3.44 (d,  $J=13.3$  Hz, 1H), 3.36 (d,  $J=13.3$  Hz, 1H);  $^{13}\text{C}$  NMR: (125 MHz,  $\text{CDCl}_3$ )  $\delta$  145.78, 138.64, 137.04, 136.66, 133.50, 129.01, 128.76, 128.47, 128.33, 128.22, 127.99, 127.55, 127.33, 127.04, 123.91, 120.07, 109.50, 68.20, 54.06, 35.99; MS (ESI-APCI) exact mass calculated for  $[\text{M}+\text{H}]$  ( $\text{C}_{27}\text{H}_{24}\text{N}_3\text{S}$ ) requires  $m/z$  422.1, found  $m/z$  422.1;  $[\alpha]_D^{25} = +74.2$  ( $c = 0.6$ ,  $\text{CH}_2\text{Cl}_2$ ).

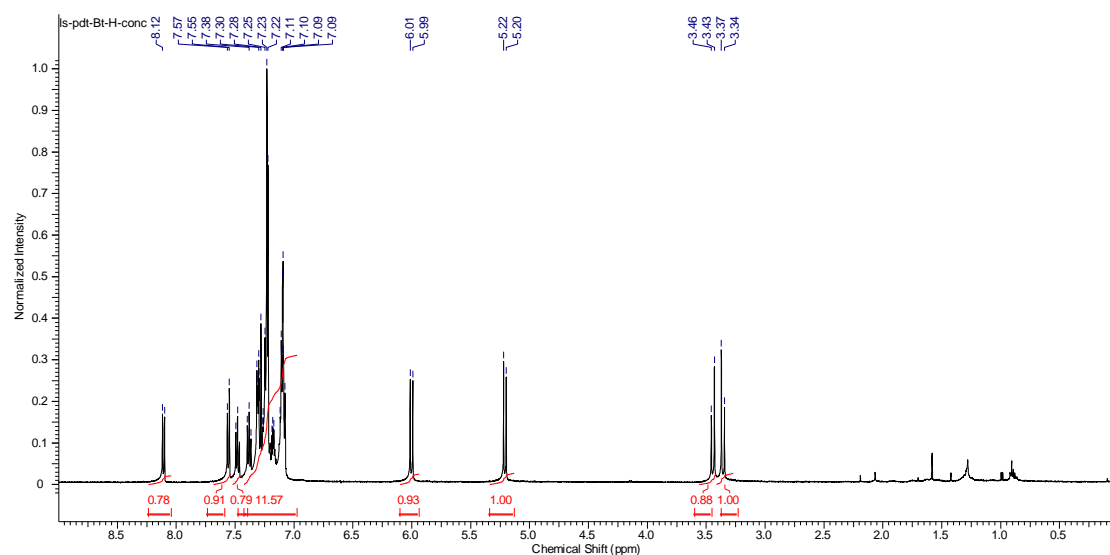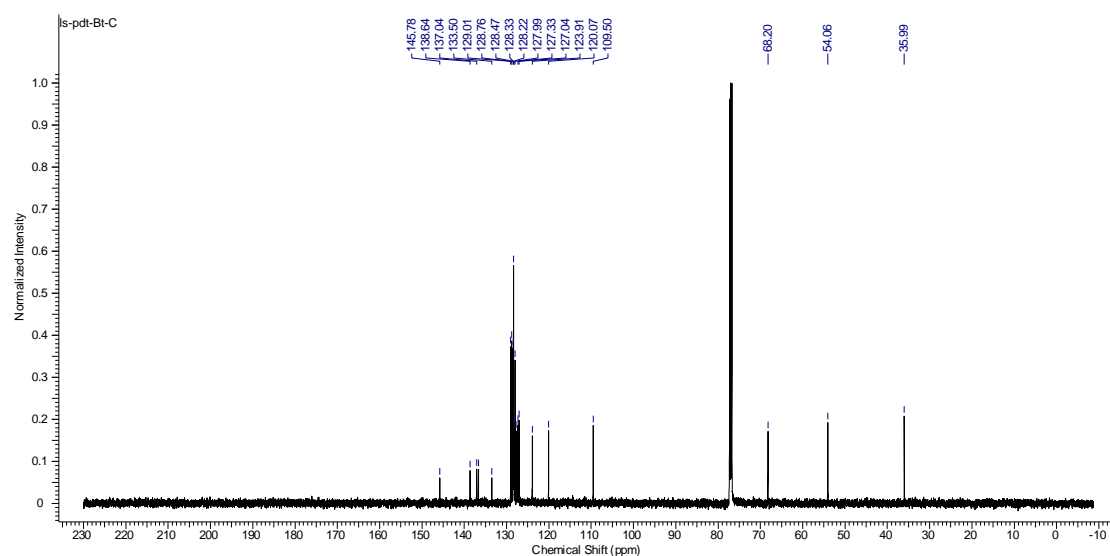

**Racemic sample:**

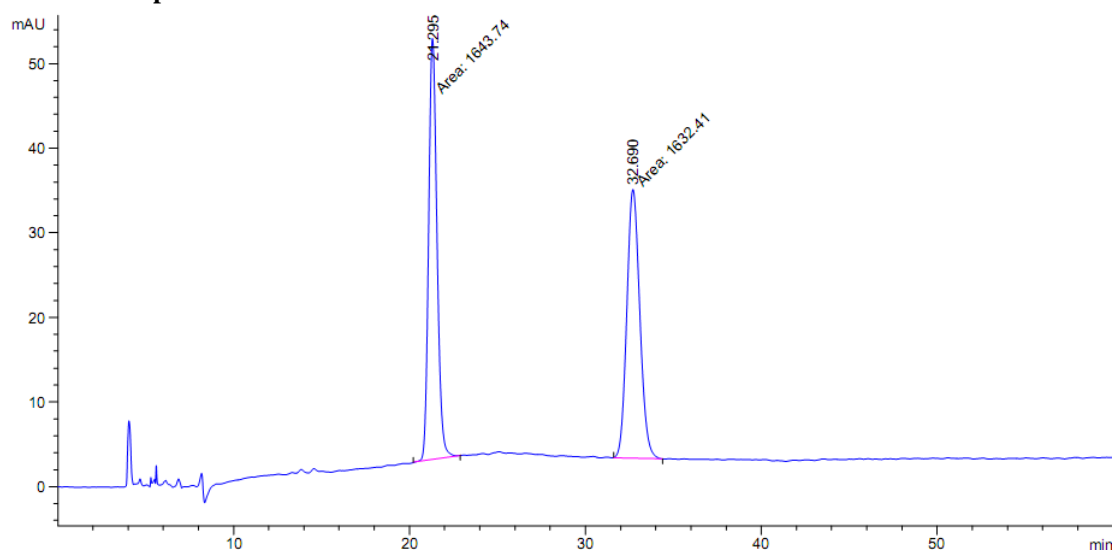

| Peak # | RetTime [min] | Type | Width [min] | Area [mAU*s] | Height [mAU] | Area %  |
|--------|---------------|------|-------------|--------------|--------------|---------|
| 1      | 21.295        | MM   | 0.5504      | 1643.73926   | 49.77459     | 50.1729 |
| 2      | 32.690        | MM   | 0.8558      | 1632.41223   | 31.78975     | 49.8271 |

**Enantioenriched sample:**

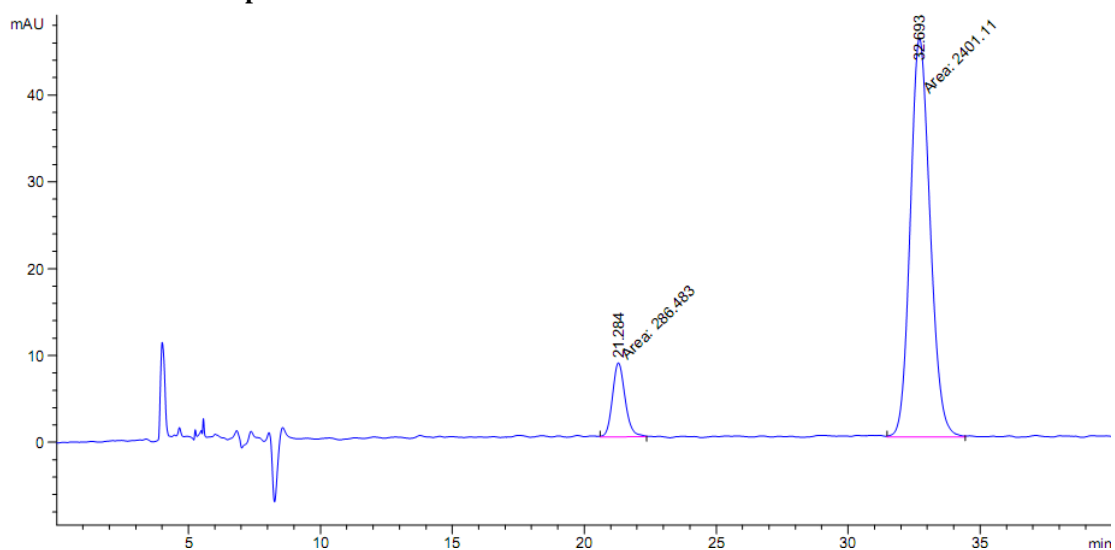

| Peak # | RetTime [min] | Type | Width [min] | Area [mAU*s] | Height [mAU] | Area %  |
|--------|---------------|------|-------------|--------------|--------------|---------|
| 1      | 21.284        | MM   | 0.5581      | 286.48303    | 8.55516      | 10.6595 |
| 2      | 32.693        | MM   | 0.8711      | 2401.11182   | 45.94217     | 89.3405 |

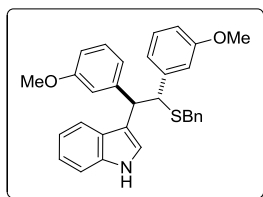

### 3-((1R,2R)-2-(benzylthio)-1,2-bis(3-methoxyphenyl)ethyl)-1H-indole (**2r**)

Followed method B from **1r** (26.2 mg, 0.05 mmol), for 40 h, and the yield of **2r** was determined by  $^1\text{H}$  NMR to be 85%. The chromatographically isolated material usually contained a small amount of **3e** and/or trichloroacetamide. Analytically pure sample could be obtained through additional flash column chromatography purification at the expense of loss of yield. This material was determined to be 93% ee by chiral HPLC analysis (ChiralPak AD-H, 15% *i*-PrOH, 1 mL/min, 230 nm,  $t_r(\text{major}) = 14$  min,  $t_r(\text{minor}) = 33$  min). IR (Film): 3374, 1724, 1693 (s), 1599 (s), 1489, 1455, 1264 (s), 1048, 910 (s), 738 (s)  $\text{cm}^{-1}$ ;  $^1\text{H}$  NMR: (500 MHz,  $\text{CDCl}_3$ )  $\delta$  8.03 (br. s., 1H), 7.43 (d,  $J=8.2$  Hz, 1H), 7.37 - 7.22 (m, 4H), 7.20 - 7.08 (m, 5H), 7.03 (t,  $J=7.3$  Hz, 1H), 6.95 (t,  $J=8.0$  Hz, 1H), 6.82 (d,  $J=7.3$  Hz, 1H), 6.79 - 6.74 (m, 1H), 6.74 - 6.68 (m, 1H), 6.65 (d,  $J=7.8$  Hz, 1H), 6.59 (d,  $J=1.8$  Hz, 1H), 6.56 - 6.50 (m, 1H), 4.62 (d,  $J=10.1$  Hz, 1H), 4.42 (d,  $J=10.1$  Hz, 1H), 3.71 (s, 2H), 3.61 (s, 2H), 3.46 (d,  $J=13.7$  Hz, 1H), 3.30 (d,  $J=13.7$  Hz, 1H);  $^{13}\text{C}$  NMR: (125 MHz,  $\text{CDCl}_3$ )  $\delta$  159.28, 144.23, 142.56, 138.39, 136.00, 129.09, 128.81, 128.64, 128.21, 127.26, 126.77, 122.47, 121.91, 121.77, 121.00, 119.44, 119.38, 116.94, 114.45, 114.42, 112.78, 111.24, 110.99, 55.16, 55.00, 54.03, 49.46, 35.82; MS (ESI-APCI) exact mass calculated for [M-SBn] ( $\text{C}_{24}\text{H}_{22}\text{NO}_2$ ) requires  $m/z$  356.2, found  $m/z$  356.2;  $[\alpha]_D^{24} = -6.7$  ( $c = 0.06$ ,  $\text{CH}_2\text{Cl}_2$ ).

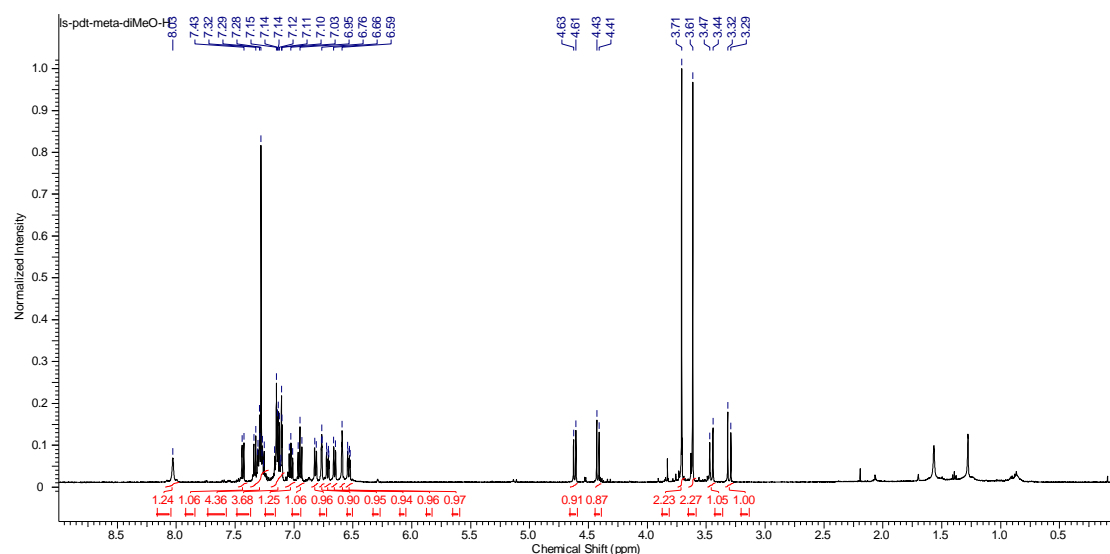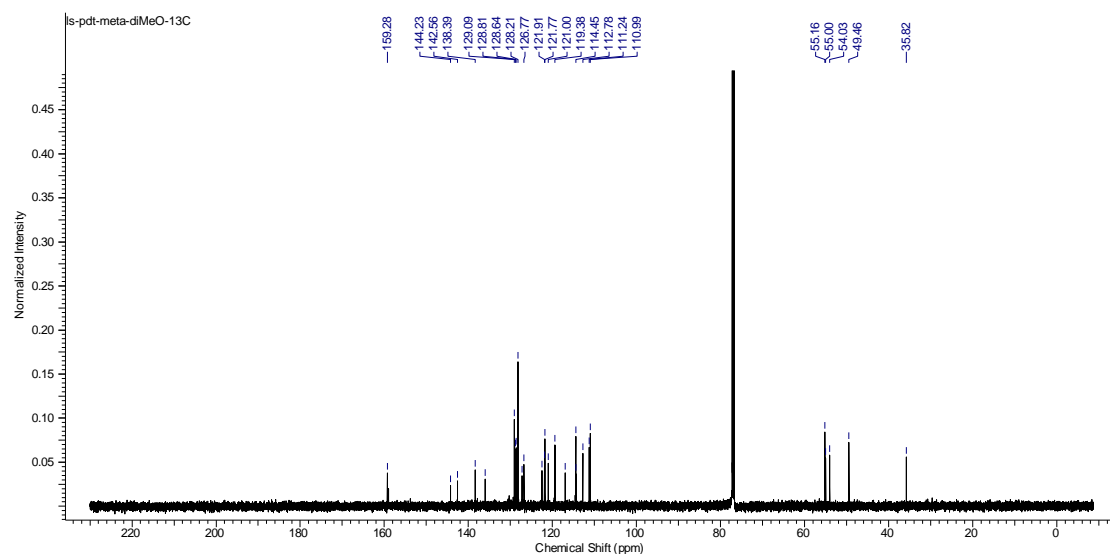

**Racemic sample:**

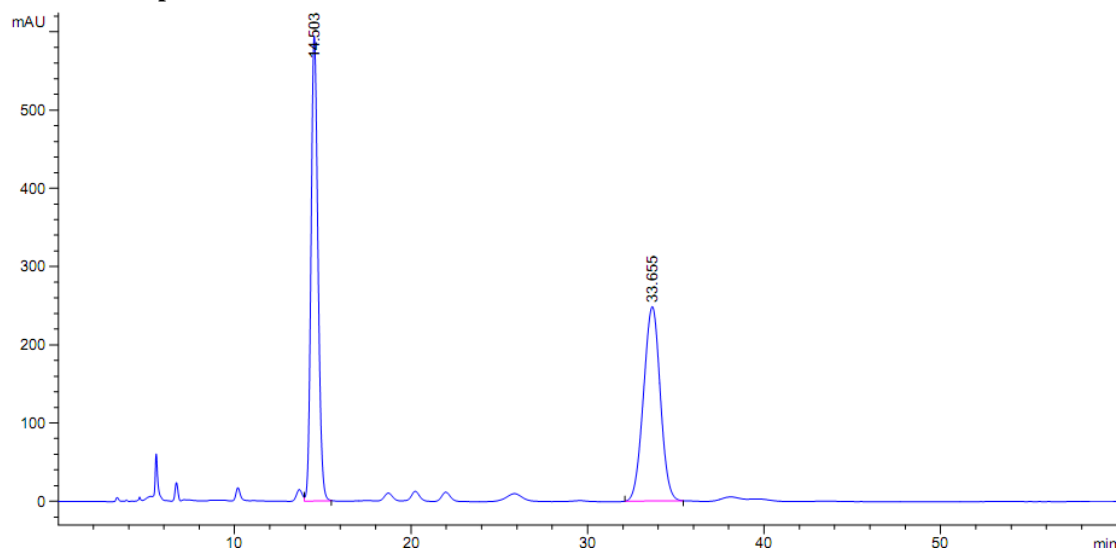

| Peak # | RetTime [min] | Type | Width [min] | Area [mAU*s] | Height [mAU] | Area %  |
|--------|---------------|------|-------------|--------------|--------------|---------|
| 1      | 14.503        | VB   | 0.4221      | 1.62046e4    | 594.26556    | 49.6241 |
| 2      | 33.655        | BB   | 1.0259      | 1.64501e4    | 248.63231    | 50.3759 |

**Enantioenriched sample:**

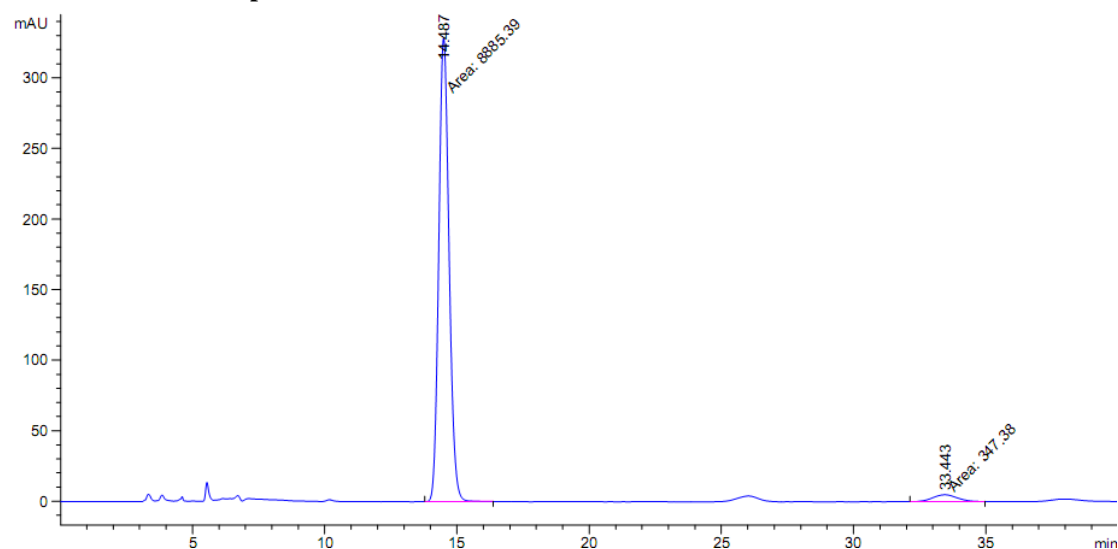

| Peak # | RetTime [min] | Type | Width [min] | Area [mAU*s] | Height [mAU] | Area %  |
|--------|---------------|------|-------------|--------------|--------------|---------|
| 1      | 14.487        | MM   | 0.4505      | 8885.38770   | 328.75171    | 96.2375 |
| 2      | 33.443        | MM   | 1.1409      | 347.38004    | 5.07454      | 3.7625  |

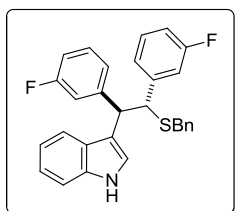

### 3-((1R,2R)-2-(benzylthio)-1,2-bis(3-fluorophenyl)ethyl)-1H-indole (**2s**)

Followed method B from **1s** (25.0 mg, 0.05 mmol), for 45 h, and purified using silica gel chromatography to give 22.2 mg (97% yield) of **2s** as a colorless gel. This material was determined to be 95% ee by chiral HPLC analysis (ChiralPak AD-H, 10% *i*-PrOH, 1 mL/min, 230 nm,  $t_r$ (major) = 27 min,  $t_r$ (minor) = 45 min). IR (Film): 3419 (s), 3059, 2917, 1613, 1588 (s), 1487 (s), 1449 (s), 1249 (s), 1134, 909, 739 (s)  $\text{cm}^{-1}$ ;  $^1\text{H}$  NMR: (500 MHz,  $\text{CDCl}_3$ )  $\delta$  8.06 (br. s., 1H), 7.47 - 7.23 (m, 6H), 7.23 - 7.11 (m, 4H), 7.11 - 6.95 (m, 4H), 6.95 - 6.83 (m, 2H), 6.83 - 6.60 (m, 2H), 4.60 (d,  $J=10.3$  Hz, 1H), 4.37 (d,  $J=10.3$  Hz, 1H), 3.50 (d,  $J=13.7$  Hz, 1H), 3.28 (d,  $J=13.7$  Hz, 1H);  $^{13}\text{C}$  NMR: (125 MHz,  $\text{CDCl}_3$ )  $\delta$  162.70 (d,  $J=246.3$  Hz, 1C), 162.44 (d,  $J=245.3$  Hz, 1C), 144.98, 143.59, 143.53, 137.95, 135.99, 129.44, 129.37, 129.25, 129.19, 129.03, 128.36, 127.00, 124.89, 124.09, 122.39, 122.14, 119.57, 119.16, 116.12, 115.79, 115.61, 115.10, 114.94, 114.09, 113.92, 113.14, 112.98, 111.12, 106.77, 53.36, 49.27, 35.78; MS (ESI-APCI) exact mass calculated for [M-SBn] ( $\text{C}_{22}\text{H}_{16}\text{F}_2\text{N}$ ) requires  $m/z$  332.1, found  $m/z$  332.1;  $[\alpha]_{\text{D}}^{22} = +83.9$  (c = 1.0,  $\text{CH}_2\text{Cl}_2$ ).

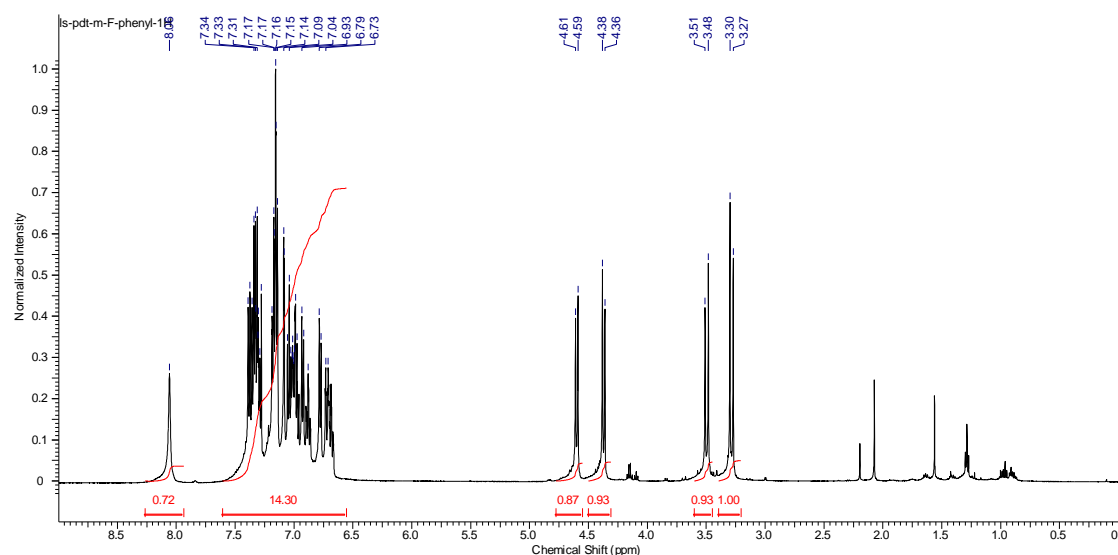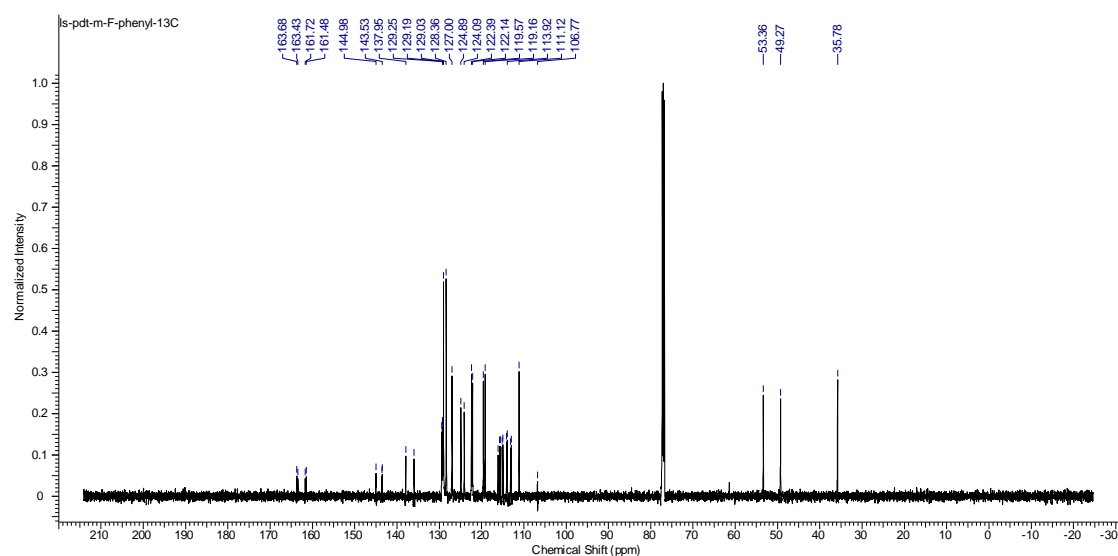

**Racemic sample:**

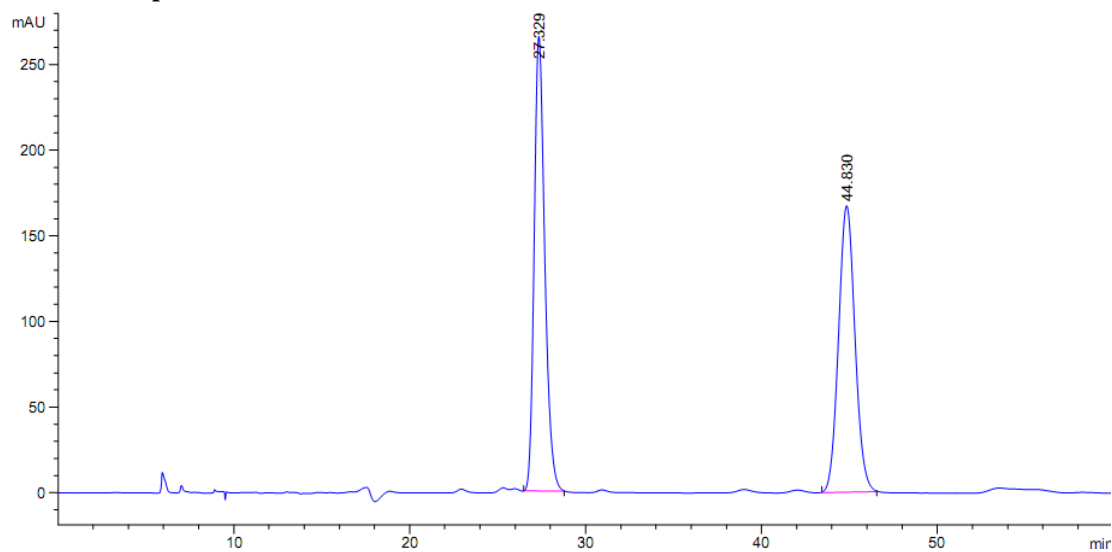

| Peak # | RetTime [min] | Type | Width [min] | Area [mAU*s] | Height [mAU] | Area %  |
|--------|---------------|------|-------------|--------------|--------------|---------|
| 1      | 27.329        | BB   | 0.6396      | 1.11361e4    | 265.38040    | 50.6236 |
| 2      | 44.830        | BB   | 1.0016      | 1.08617e4    | 167.27299    | 49.3764 |

**Enantioenriched sample:**

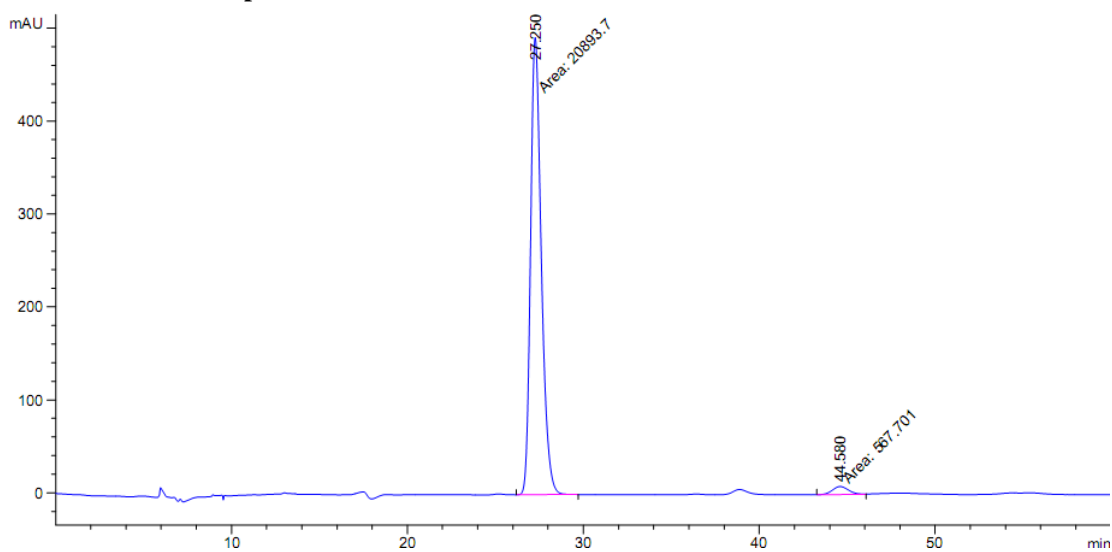

| Peak # | RetTime [min] | Type | Width [min] | Area [mAU*s] | Height [mAU] | Area %  |
|--------|---------------|------|-------------|--------------|--------------|---------|
| 1      | 27.250        | MM   | 0.7080      | 2.08937e4    | 491.83978    | 97.3548 |
| 2      | 44.580        | MM   | 1.0845      | 567.70099    | 8.72422      | 2.6452  |



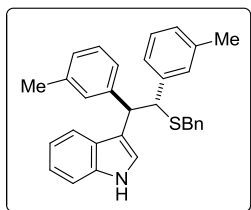

### 3-((1R,2R)-2-(benzylthio)-1,2-di-*m*-tolylethyl)-1H-indole (**2t**)

Followed method B from **1t** (24.6 mg, 0.05 mmol), for 45 h, and purified using silica gel chromatography to give 21.3 mg (95% yield) of **2t** as a colorless gel. This material was determined to be 93% ee by chiral HPLC analysis (ChiralPak AD-H, 10% *i*-PrOH, 1 mL/min, 230 nm,  $t_r(\text{major}) = 16$  min,  $t_r(\text{minor}) = 23$  min). IR (Film): 3420 (s), 3027, 2918, 1604, 1489, 1455, 1418, 1096, 909 (s), 738 (s)  $\text{cm}^{-1}$ ;  $^1\text{H}$  NMR: (500 MHz,  $\text{CDCl}_3$ )  $\delta$  7.98 (br. s., 1H), 7.42 (d,  $J=8.2$  Hz, 1H), 7.31 (d,  $J=7.8$  Hz, 1H), 7.30 - 7.21 (m, 3H), 7.16 - 7.10 (m, 3H), 7.09 - 6.98 (m, 4H), 6.94 (d,  $J=7.3$  Hz, 2H), 6.90 (t,  $J=7.3$  Hz, 1H), 6.84 (d,  $J=7.8$  Hz, 1H), 6.80 (s, 1H), 6.77 (d,  $J=7.3$  Hz, 1H), 4.61 (d,  $J=9.6$  Hz, 1H), 4.41 (d,  $J=9.6$  Hz, 1H), 3.42 (d,  $J=13.3$  Hz, 1H), 3.26 (d,  $J=13.7$  Hz, 1H), 2.26 (s, 3H), 2.12 (s, 2H);  $^{13}\text{C}$  NMR: (125 MHz,  $\text{CDCl}_3$ )  $\delta$  142.54, 140.86, 138.52, 137.32, 137.02, 135.98, 129.87, 129.33, 129.09, 128.19, 127.63, 127.50, 127.37, 126.70, 126.63, 126.35, 125.44, 122.47, 121.85, 119.52, 119.31, 117.29, 110.94, 54.07, 49.26, 35.83, 21.36, 21.32; MS (APCI) exact mass calculated for [M-SBn] ( $\text{C}_{24}\text{H}_{22}\text{N}$ ) requires  $m/z$  324.2, found  $m/z$  324.1;  $[\alpha]_{\text{D}}^{24} = +13.0$  ( $c = 0.1$ ,  $\text{CH}_2\text{Cl}_2$ ).

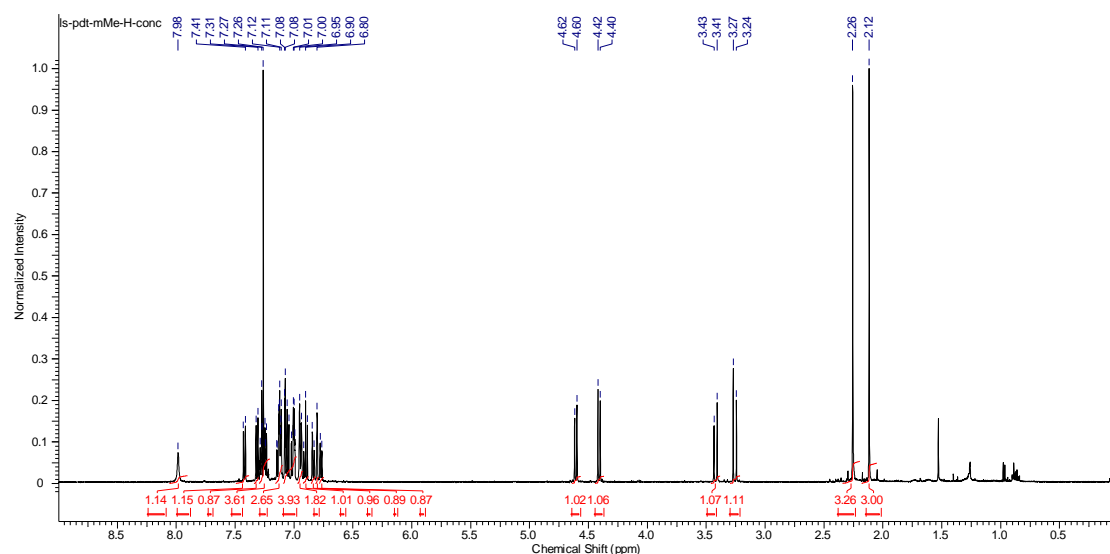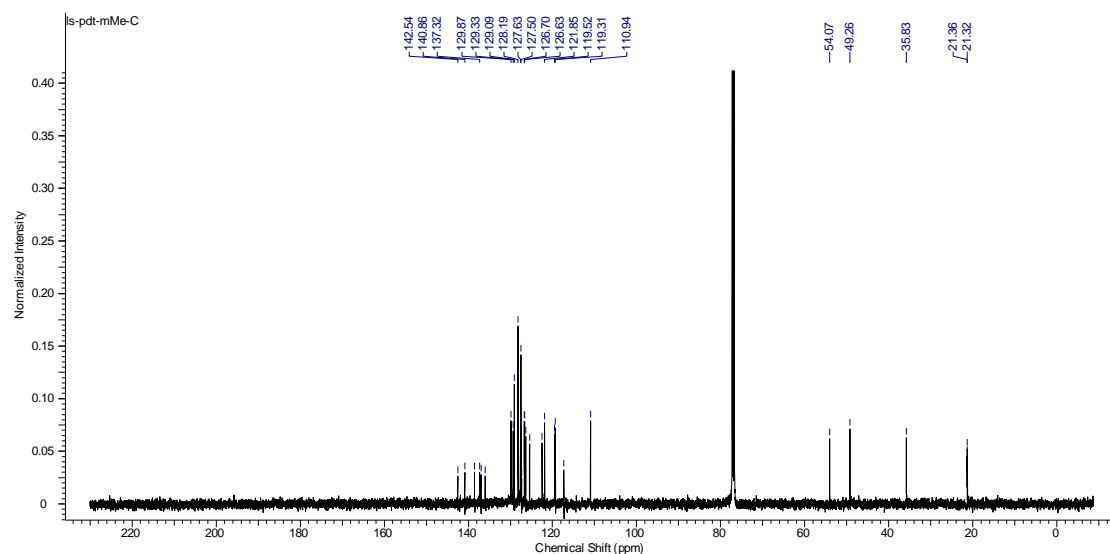

### Racemic sample:

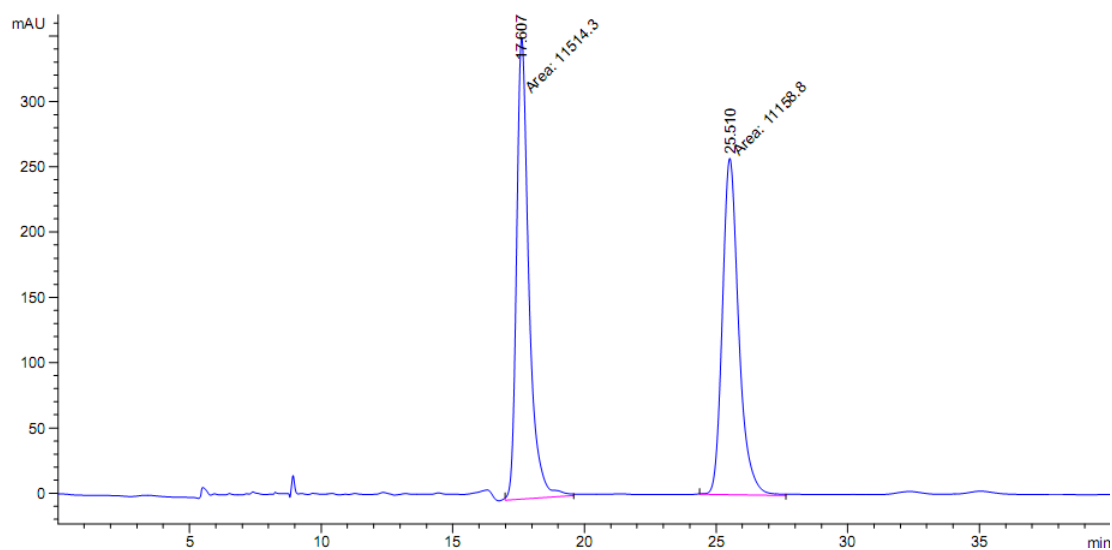

| Peak # | RetTime [min] | Type | Width [min] | Area [mAU*s] | Height [mAU] | Area %  |
|--------|---------------|------|-------------|--------------|--------------|---------|
| 1      | 17.607        | MM   | 0.5430      | 1.15143e4    | 353.43860    | 50.7840 |
| 2      | 25.510        | MM   | 0.7215      | 1.11588e4    | 257.78049    | 49.2160 |

### Enantioenriched sample:

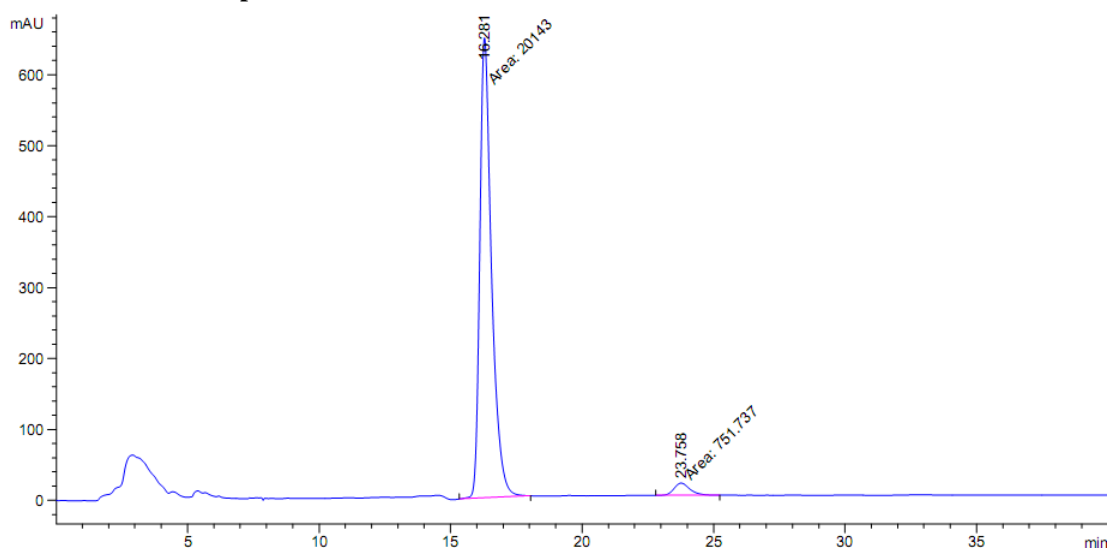

| Peak # | RetTime [min] | Type | Width [min] | Area [mAU*s] | Height [mAU] | Area %  |
|--------|---------------|------|-------------|--------------|--------------|---------|
| 1      | 16.281        | MM   | 0.5177      | 2.01430e4    | 648.44629    | 96.4023 |
| 2      | 23.758        | MM   | 0.7181      | 751.73743    | 17.44797     | 3.5977  |

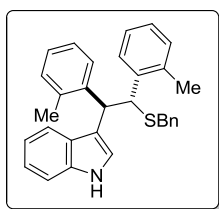

### 3-((1R,2R)-2-(benzylthio)-1,2-di-*o*-tolylethyl)-1H-indole (**2u**)

Followed method B from **1u** (24.6 mg, 0.05 mmol), for 40 h, and purified using silica gel chromatography to give 22.5 mg (>99% yield) of **2u** as a colorless gel.

This material was determined to be 79% ee by chiral HPLC analysis (ChiralPak AD-H, 10% *i*-PrOH, 1 mL/min, 230 nm,  $t_r$ (major) = 8 min,  $t_r$ (minor) = 12 min).

IR (Film): 3148 (s), 3059, 1600, 1489, 1455 (s), 1419, 1380, 1277, 1176, 1133, 1097, 1011, 737 (s)  $\text{cm}^{-1}$ ;  $^1\text{H}$  NMR: (500 MHz,  $\text{CDCl}_3$ )  $\delta$  8.04 (br. s., 1H), 7.75 - 7.56 (m, 2H), 7.44 (d,  $J=7.8$  Hz, 1H), 7.33 (d,  $J=8.3$  Hz, 1H), 7.26 - 7.03 (m, 9H), 7.02 - 6.97 (m, 3H), 6.95 - 6.78 (m, 2H), 5.07 (d,  $J=9.8$  Hz, 1H), 4.85 (d,  $J=9.8$  Hz, 1H), 3.22 (d,  $J=13.7$  Hz, 1H), 3.11 (d,  $J=13.2$  Hz, 1H), 2.17 (s, 3H), 1.92 (s, 3H);  $^{13}\text{C}$  NMR: (125 MHz,  $\text{CDCl}_3$ )  $\delta$  141.90, 139.52, 138.43, 136.13, 135.84, 135.43, 130.11, 128.99, 128.19, 127.83, 127.62, 127.13, 126.68, 126.52, 126.01, 125.76, 125.47, 123.44, 121.92, 119.71, 119.38, 117.51, 111.06, 49.74, 44.22, 36.29, 19.85, 19.27; MS (ESI-APCI) exact mass calculated for  $[\text{M}-\text{SBn}]$  ( $\text{C}_{23}\text{H}_{23}\text{S}$ ) requires  $m/z$  324.2, found  $m/z$  324.2;  $[\alpha]_D^{23} = +129$  ( $c = 1.0$ ,  $\text{CH}_2\text{Cl}_2$ ).

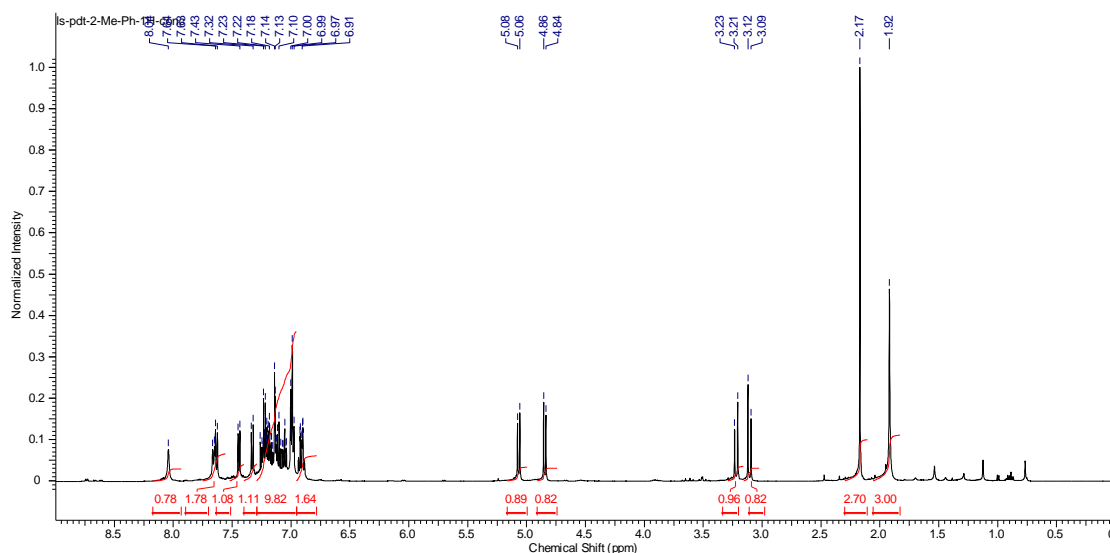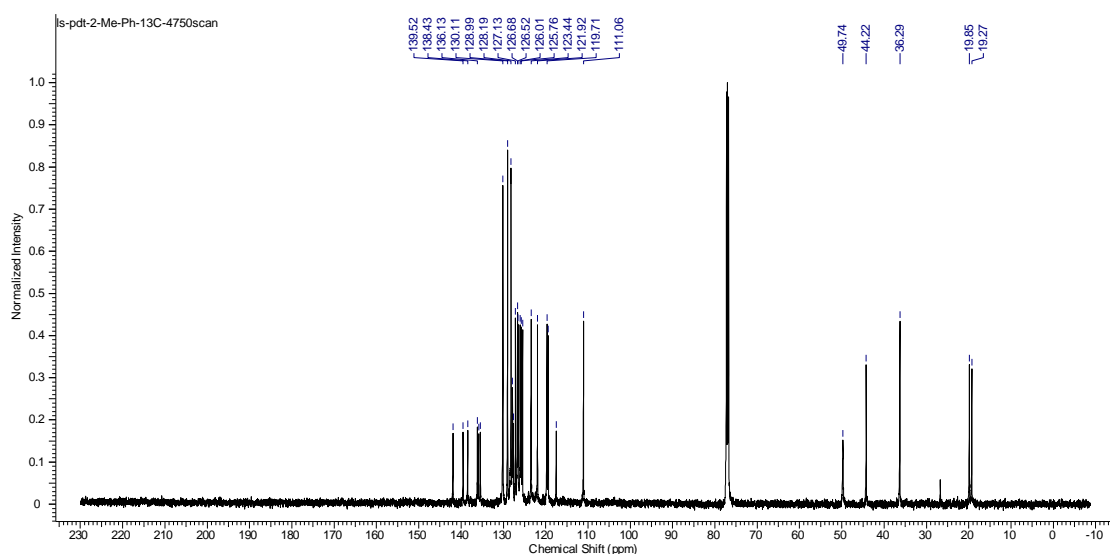

**Racemic sample:**

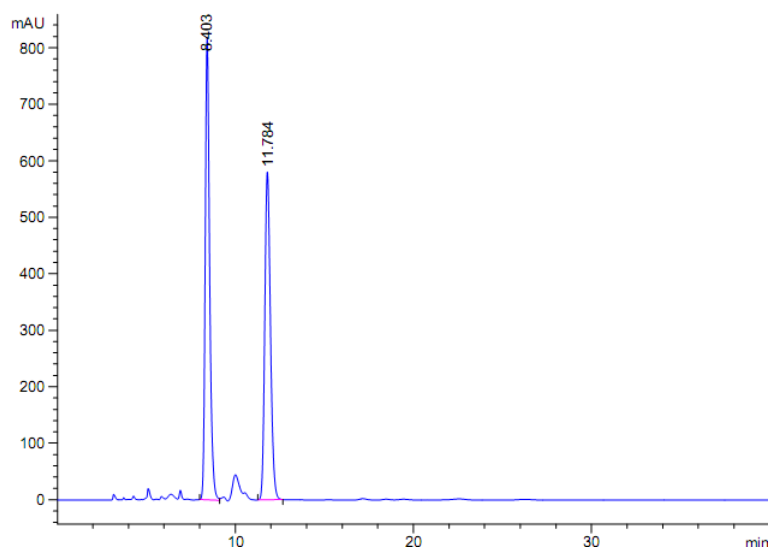

| Peak # | RetTime [min] | Type | Width [min] | Area [mAU*s] | Height [mAU] | Area %  |
|--------|---------------|------|-------------|--------------|--------------|---------|
| 1      | 8.403         | BV   | 0.2600      | 1.41769e4    | 818.90674    | 52.4842 |
| 2      | 11.784        | BB   | 0.3420      | 1.28349e4    | 580.34973    | 47.5158 |

**Enantioenriched sample:**

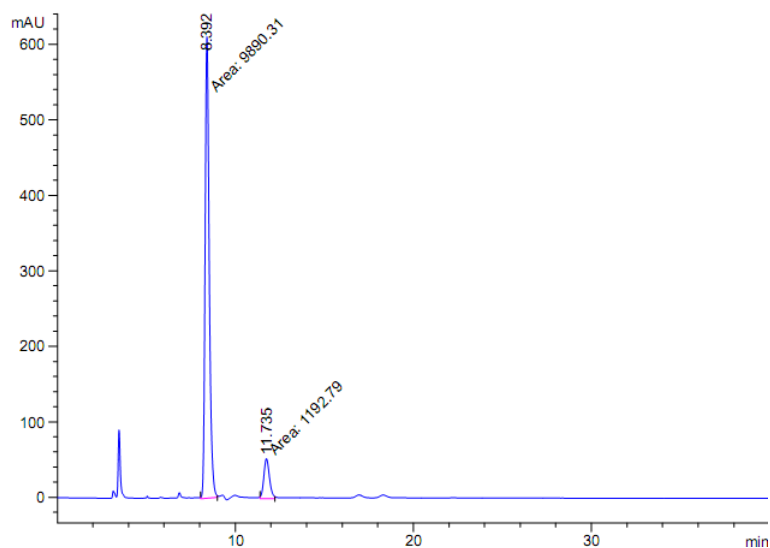

| Peak # | RetTime [min] | Type | Width [min] | Area [mAU*s] | Height [mAU] | Area %  |
|--------|---------------|------|-------------|--------------|--------------|---------|
| 1      | 8.392         | MM   | 0.2694      | 9890.31445   | 611.79687    | 89.2378 |
| 2      | 11.735        | MM   | 0.3725      | 1192.78760   | 53.37052     | 10.7622 |

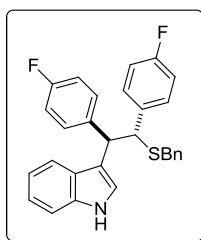

### 3-((1R,2R)-2-(benzylthio)-1,2-bis(4-fluorophenyl)ethyl)-1H-indole (**2v**)

Followed method B from **1v** (25.0 mg, 0.05 mmol), for 47 h, and purified using silica gel chromatography to give 20.8 mg (91% yield) of **2v** as a colorless gel.

This material was determined to be 45% ee by chiral HPLC analysis (ChiralPak AD-H, 10% *i*-PrOH, 1 mL/min, 230 nm,  $t_r(\text{major}) = 18$  min,  $t_r(\text{minor}) = 26$  min).

IR (Film): 3418 (s), 3060, 2915, 1602, 1505 (s), 1455, 1417, 1218 (s), 1157, 1095, 908, 736 (s)  $\text{cm}^{-1}$ ;  $^1\text{H}$  NMR: (500 MHz,  $\text{CDCl}_3$ )  $\delta$  8.03 (br. s., 1H), 7.43 - 7.24 (m, 5H), 7.23 - 7.00 (m, 7H), 6.99 - 6.83 (m, 4H), 6.79 - 6.64 (m, 2H), 4.58 (d,  $J=10.1$  Hz, 1H), 4.36 (d,  $J=10.1$  Hz, 1H), 3.49 (d,  $J=13.7$  Hz, 1H), 3.26 (d,  $J=13.7$  Hz, 1H);  $^{13}\text{C}$  NMR: (125 MHz,  $\text{CDCl}_3$ )  $\delta$  161.59 (d,  $J=246.3$  Hz, 1C), 161.09 (d,  $J=245.3$  Hz, 1C), 138.15, 138.11, 136.44, 136.42, 136.03, 130.64, 130.58, 129.80, 129.74, 129.65, 129.01, 128.31, 126.99, 126.91, 122.35, 122.09, 119.50, 119.25, 116.63, 114.95, 114.78, 114.69, 114.53, 111.10, 53.24, 49.05, 35.75; MS (ESI-APCI) exact mass calculated for  $[\text{M}+\text{H}]$  ( $\text{C}_{29}\text{H}_{23}\text{F}_2\text{NS}$ ) requires  $m/z$  456.2, found  $m/z$  456.1;  $[\alpha]_D^{25} = +42.8$  ( $c = 1.0$ ,  $\text{CH}_2\text{Cl}_2$ ).

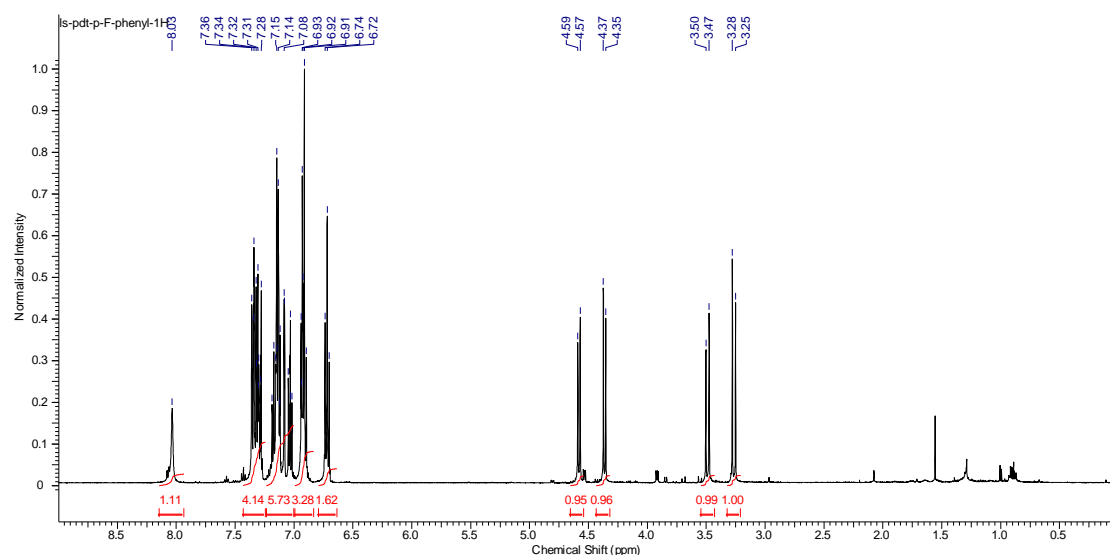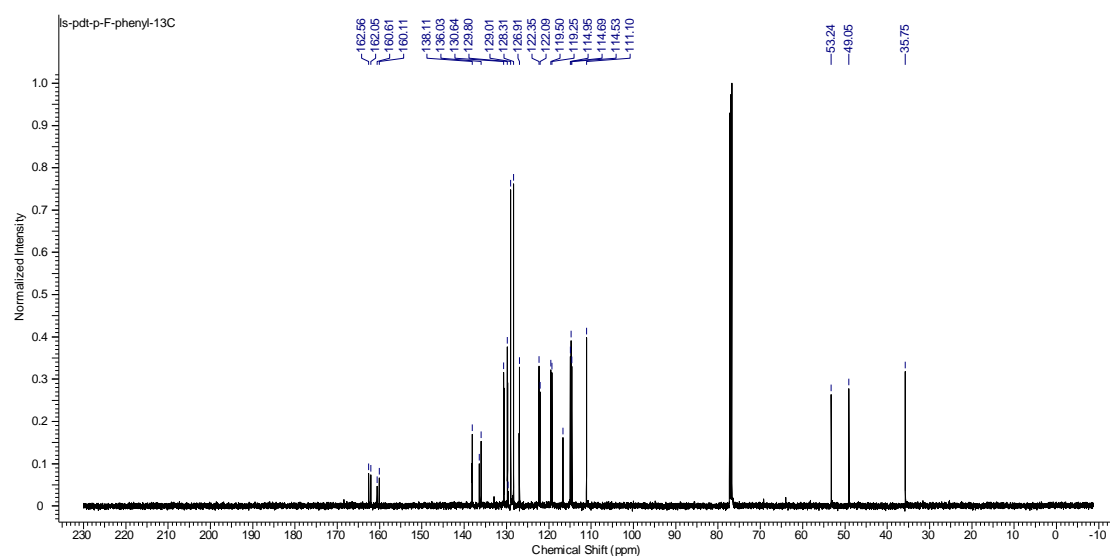

### Racemic sample:

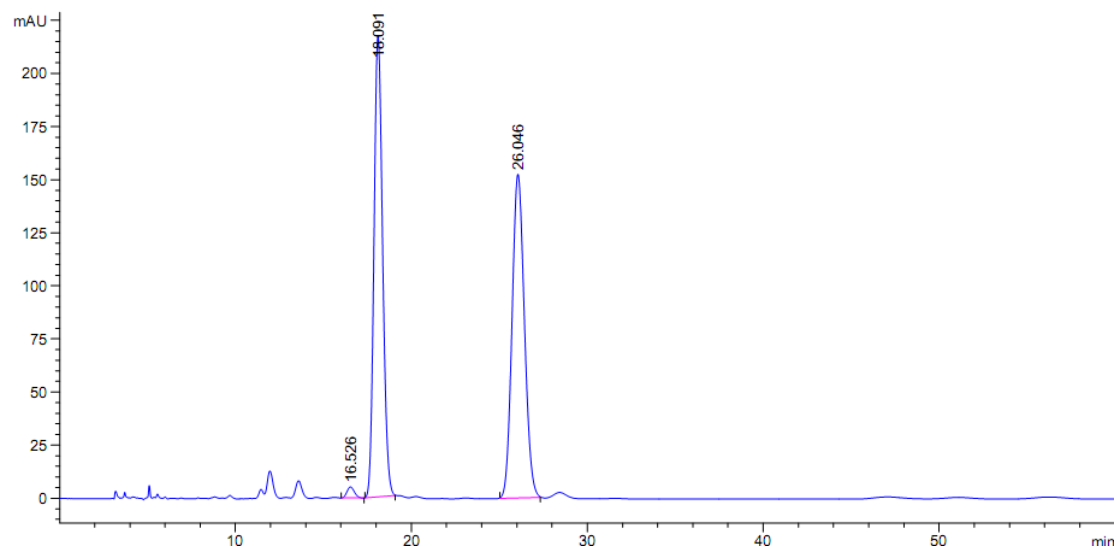

| Peak # | RetTime [min] | Type | Width [min] | Area [mAU*s] | Height [mAU] | Area %  |
|--------|---------------|------|-------------|--------------|--------------|---------|
| 1      | 16.526        | BB   | 0.4538      | 154.63104    | 5.24775      | 1.0303  |
| 2      | 18.091        | BB   | 0.5275      | 7405.12695   | 217.31786    | 49.3390 |
| 3      | 26.046        | BB   | 0.7598      | 7448.91064   | 152.50339    | 49.6307 |

### Enantioenriched sample:

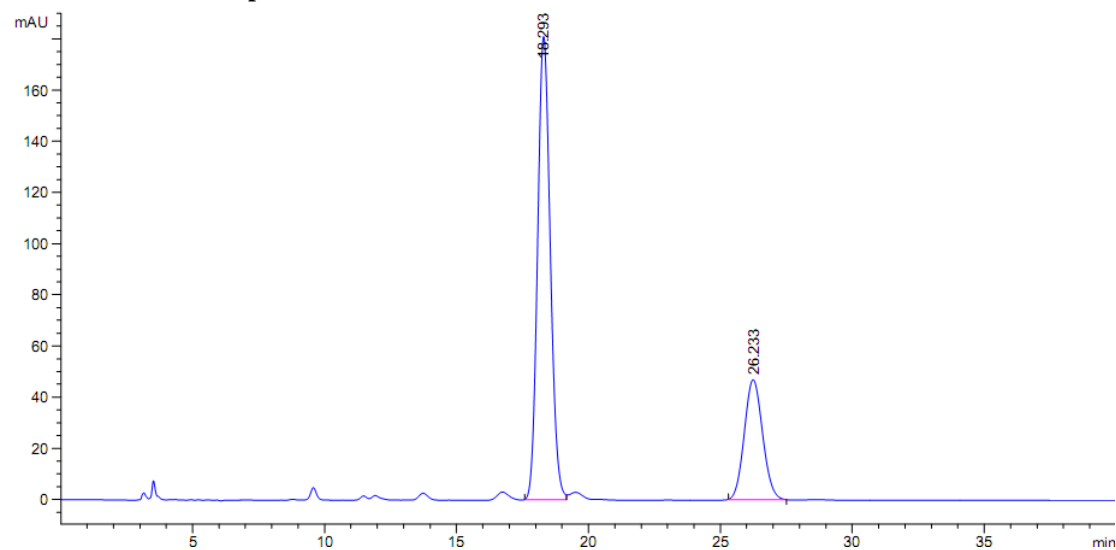

| Peak # | RetTime [min] | Type | Width [min] | Area [mAU*s] | Height [mAU] | Area %  |
|--------|---------------|------|-------------|--------------|--------------|---------|
| 1      | 18.293        | BB   | 0.5171      | 6041.25928   | 181.14336    | 72.6590 |
| 2      | 26.233        | BB   | 0.7505      | 2273.27417   | 46.98168     | 27.3410 |

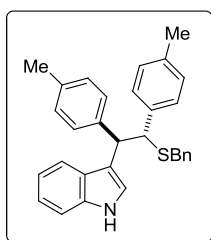

### 3-((1*R*,2*R*)-2-(benzylthio)-1,2-di-*p*-tolylethyl)-1*H*-indole (**2w**)

Followed method B from **1w** (24.6 mg, 0.05 mmol), for 47 h, and purified using silica gel chromatography to give 20.0 mg (89% yield) of **2w** as a colorless gel. This material was determined to be 60% ee by chiral HPLC analysis (ChiralPak AD-H, 10% *i*-PrOH, 1 mL/min, 230 nm,  $t_r$ (major) = 12 min,  $t_r$ (minor) = 26 min). IR (Film): 3420 (br), 3025, 2929, 1510, 1454, 1417, 1337, 1096, 907 (s), 731 (s)  $\text{cm}^{-1}$ ;  $^1\text{H}$  NMR: (500 MHz,  $\text{CDCl}_3$ )  $\delta$  7.94 (br. s., 1H), 7.45 (d,  $J=8.1$  Hz, 1H), 7.37 - 7.22 (m, 4H), 7.20 - 7.08 (m, 5H), 7.08 - 6.99 (m, 4H), 6.93 (d,  $J=8.1$  Hz, 2H), 6.84 (d,  $J=8.1$  Hz, 2H), 4.64 (d,  $J=10.0$  Hz, 1H), 4.45 (d,  $J=10.0$  Hz, 1H), 3.42 (d,  $J=13.4$  Hz, 1H), 3.25 (d,  $J=13.7$  Hz, 1H), 2.31 (s, 3H), 2.16 (s, 3H);  $^{13}\text{C}$  NMR: (125 MHz,  $\text{CDCl}_3$ )  $\delta$  139.66, 138.51, 137.87, 136.20, 135.99, 135.18, 129.09, 129.06, 128.60, 128.43, 128.29, 128.18, 127.21, 126.67, 122.35, 121.79, 119.48, 119.27, 117.48, 110.96, 53.71, 48.99, 35.73, 21.10, 20.91; MS (ESI-APCI) exact mass calculated for [M-SBn] ( $\text{C}_{24}\text{H}_{22}\text{N}$ ) requires  $m/z$  324.2, found  $m/z$  324.2;  $[\alpha]_D^{25} = +91.2$  ( $c = 1.0$ ,  $\text{CH}_2\text{Cl}_2$ ).

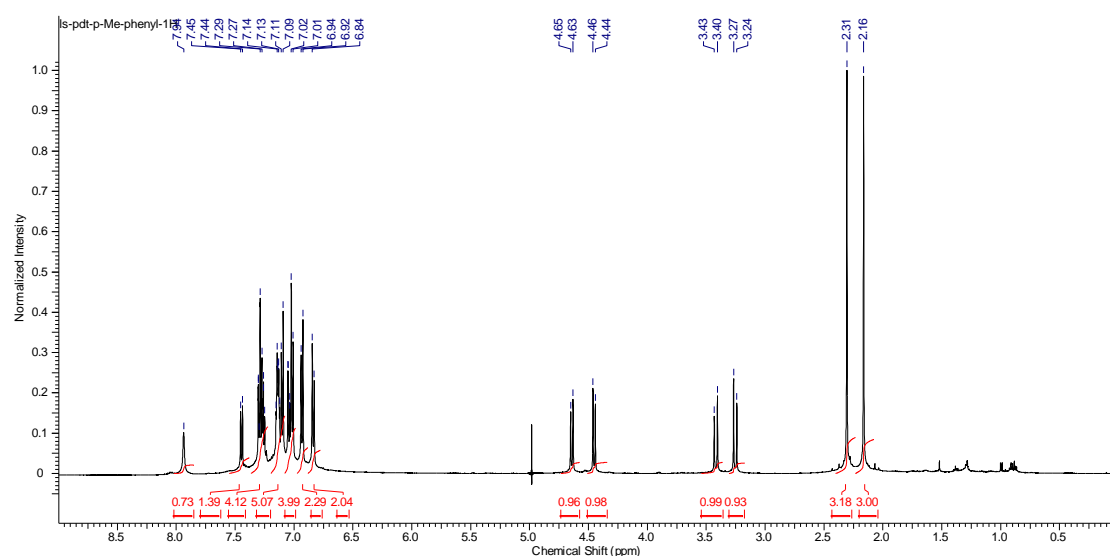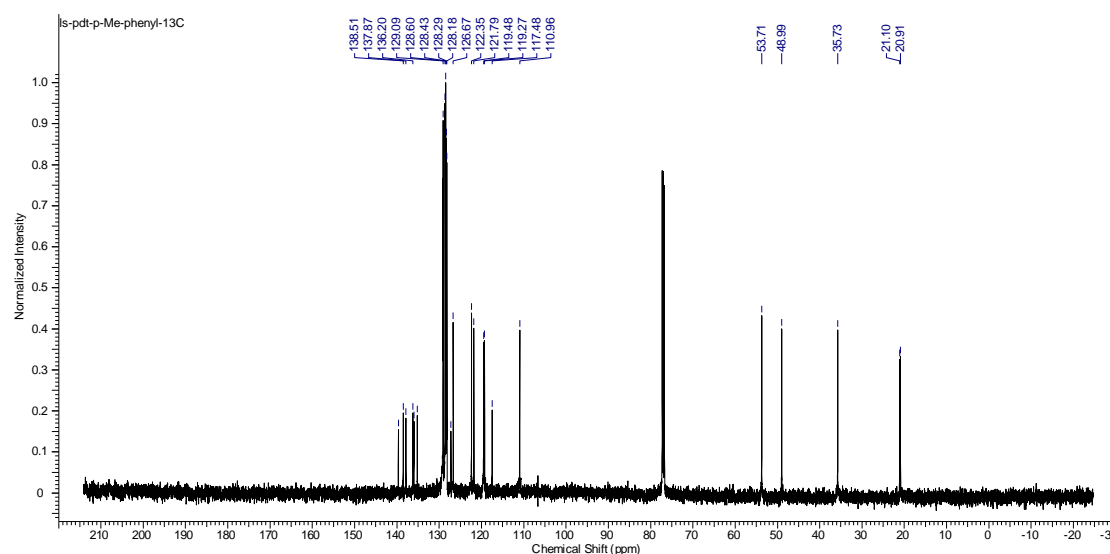

**Racemic sample:**

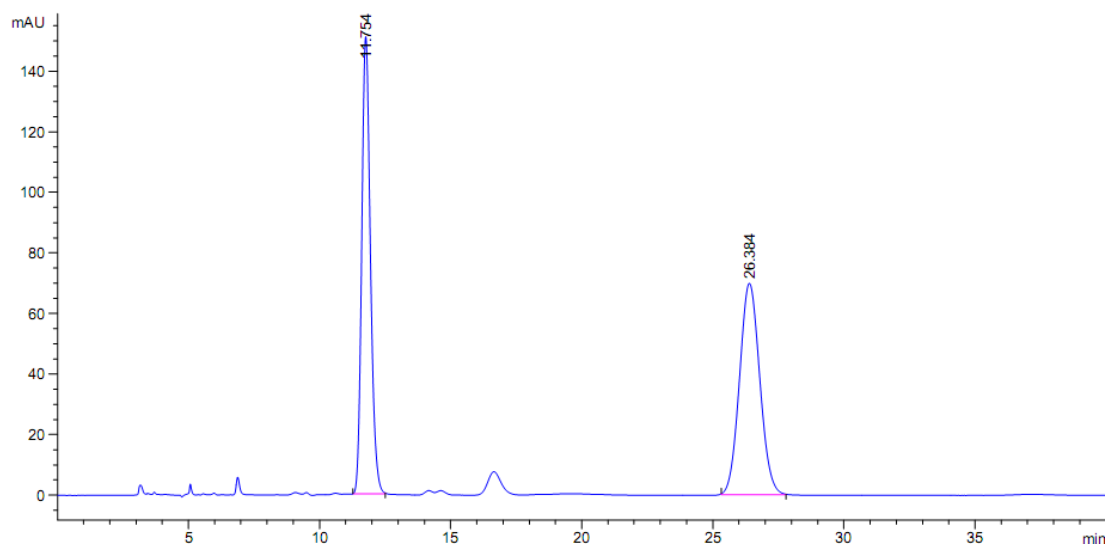

| Peak # | RetTime [min] | Type | Width [min] | Area [mAU*s] | Height [mAU] | Area %  |
|--------|---------------|------|-------------|--------------|--------------|---------|
| 1      | 11.754        | BB   | 0.3548      | 3480.52808   | 151.08057    | 48.1467 |
| 2      | 26.384        | BB   | 0.8364      | 3748.47632   | 69.81534     | 51.8533 |

**Enantioenriched sample:**

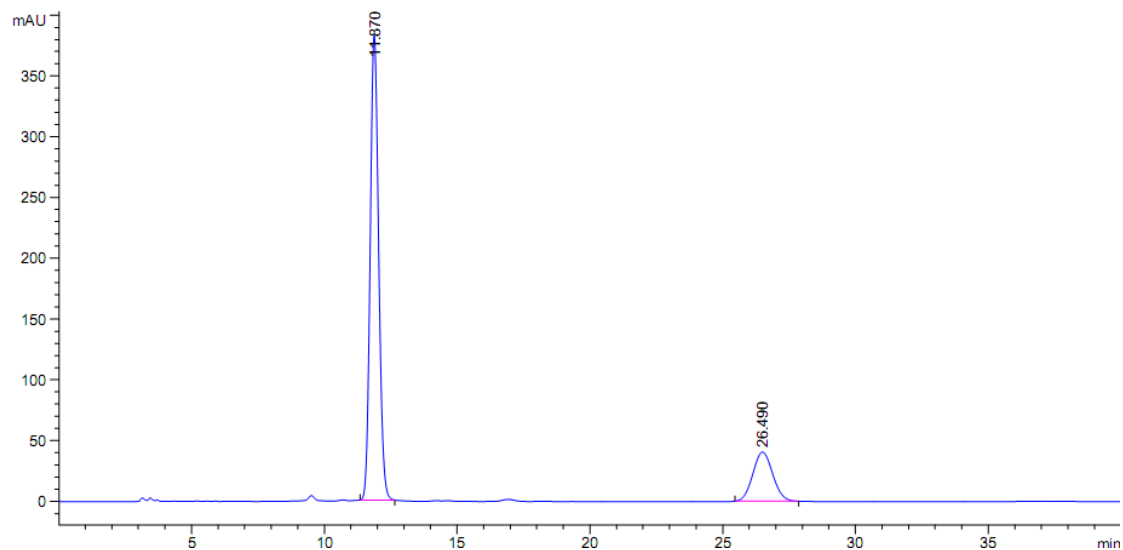

| Peak # | RetTime [min] | Type | Width [min] | Area [mAU*s] | Height [mAU] | Area %  |
|--------|---------------|------|-------------|--------------|--------------|---------|
| 1      | 11.870        | BB   | 0.3439      | 8468.12793   | 383.01013    | 79.9721 |
| 2      | 26.490        | BB   | 0.8118      | 2120.72217   | 40.57563     | 20.0279 |



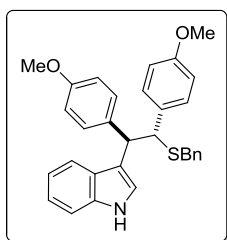

### 3-((1R,2R)-2-(benzylthio)-1,2-bis(4-methoxyphenyl)ethyl)-1H-indole (**2x**)

Followed method B from **1x** (26.2 mg, 0.05 mmol), for 40 h, and yield of **2x** was determined by  $^1\text{H}$  NMR to be 67%. The chromatographically isolated material usually contained a small amount of **3e** and/or trichloroacetamide. Analytically pure sample could be obtained through additional flash column chromatography purification at the expense of loss of yield. This material was determined to be 6% ee by chiral HPLC analysis (ChiralPak AD-H, 15% *i*-PrOH, 1 mL/min, 230 nm,  $t_r$ (major) = 36 min,  $t_r$ (minor) = 31 min). IR (Film): 3373, 3030, 2836, 1723, 1694, 1609, 1583, 1509 (s), 1455, 1247 (s), 1175, 1107, 1032, 908, 833, 734 (s)  $\text{cm}^{-1}$ ;  $^1\text{H}$  NMR: (500 MHz,  $\text{CDCl}_3$ )  $\delta$  7.84 (br. s., 1H), 7.38 - 7.14 (m, 10H), 7.12 - 7.01 (m, 1H), 7.01 - 6.86 (m, 3H), 6.80 (d,  $J=8.8$  Hz, 2H), 6.76 (d,  $J=8.3$  Hz, 2H), 4.62 (d,  $J=9.3$  Hz, 1H), 4.45 (d,  $J=8.8$  Hz, 1H), 3.78 (s, 3H), 3.76 (s, 3H), 3.37 (d,  $J=13.2$  Hz, 1H), 3.27 (d,  $J=13.2$  Hz, 1H);  $^{13}\text{C}$  NMR: (125 MHz,  $\text{CDCl}_3$ )  $\delta$  158.24, 158.13, 138.30, 135.76, 134.17, 133.86, 129.95, 129.62, 129.40, 129.07, 128.21, 126.82, 126.73, 121.85, 121.71, 119.18, 119.09, 118.20, 113.43, 113.24, 110.80, 55.12, 53.30, 48.54, 35.65; MS (ESI-APCI) exact mass calculated for [M-SBn] ( $\text{C}_{24}\text{H}_{23}\text{NO}_2$ ) requires  $m/z$  356.2, found  $m/z$  356.1.

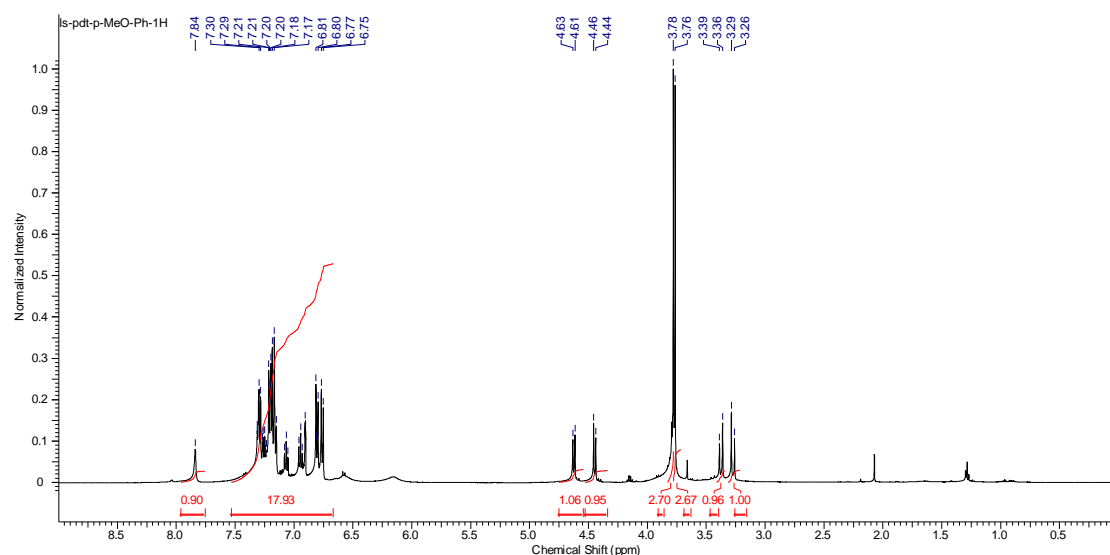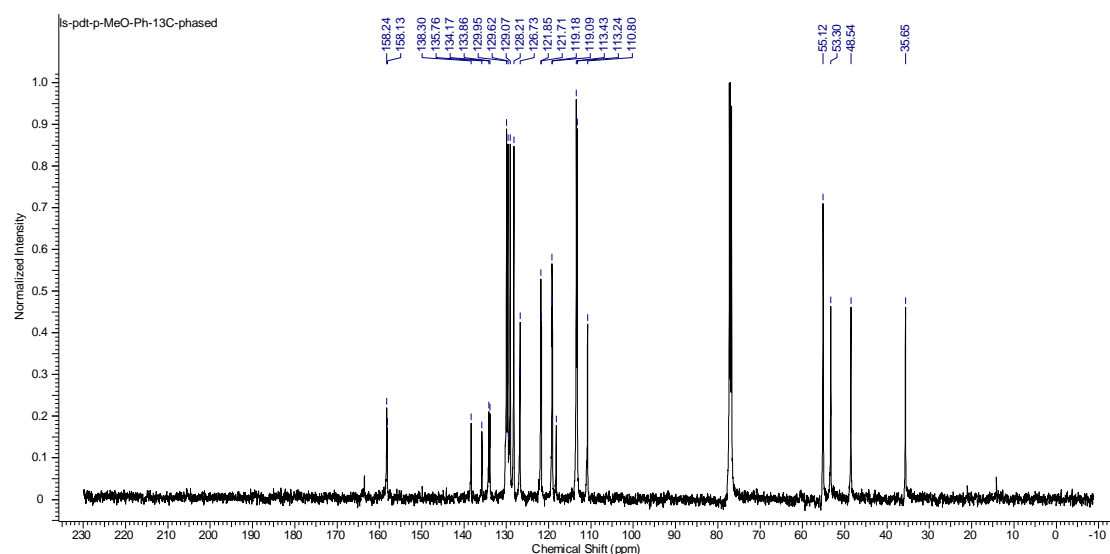

**Racemic sample:**

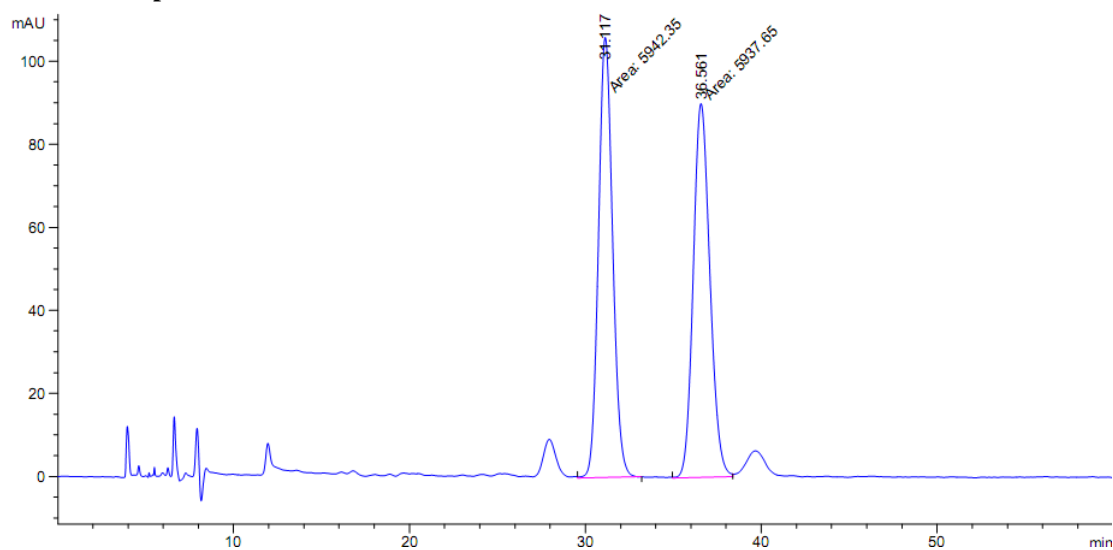

| Peak # | RetTime [min] | Type | Width [min] | Area [mAU*s] | Height [mAU] | Area %  |
|--------|---------------|------|-------------|--------------|--------------|---------|
| 1      | 31.117        | MM   | 0.9338      | 5942.34717   | 106.06420    | 50.0198 |
| 2      | 36.561        | MM   | 1.0982      | 5937.64551   | 90.11387     | 49.9802 |

**Enantioenriched sample:**

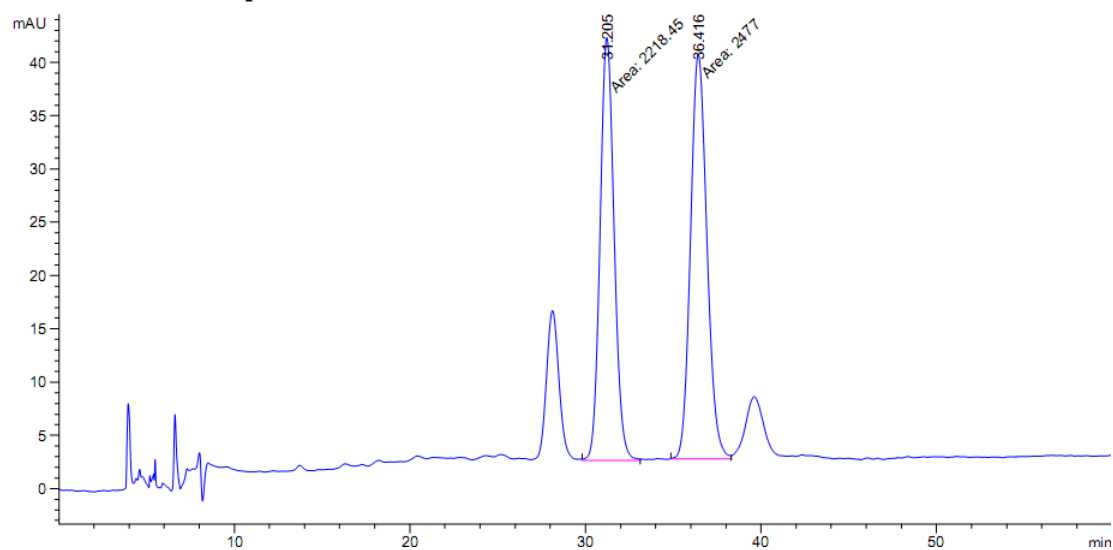

| Peak # | RetTime [min] | Type | Width [min] | Area [mAU*s] | Height [mAU] | Area %  |
|--------|---------------|------|-------------|--------------|--------------|---------|
| 1      | 31.205        | MM   | 0.9312      | 2218.45142   | 39.70664     | 47.2469 |
| 2      | 36.416        | MM   | 1.0865      | 2476.99536   | 37.99585     | 52.7531 |

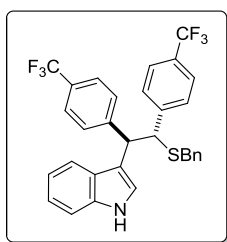

### 3-((1R,2R)-2-(benzylthio)-1,2-bis(4-(trifluoromethyl)phenyl)ethyl)-1H-indole (**2y**)

Followed method B from **1y** (30.0 mg, 0.05 mmol), for 42 h, and purified using silica gel chromatography to give 5.1 mg (18% yield) of **2y** as a colorless gel. This material was determined to be 5% ee by chiral HPLC analysis (ChiralPak AD-H, 10% *i*-PrOH, 1 mL/min, 230 nm,  $t_r$ (major) = 12 min,  $t_r$ (minor) = 14min). IR (Film): 3417, 2923, 1617, 1456, 1417, 1324 (s), 1164, 1120 (s), 1068, 1017, 742  $\text{cm}^{-1}$ ;  $^1\text{H}$  NMR: (500 MHz,  $\text{CDCl}_3$ )  $\delta$  8.08 (br. s., 1H), 7.45 (d,  $J=8.3$  Hz, 1H), 7.37 - 7.20 (m, 10H), 7.17 (ddd,  $J=1.0, 7.0, 8.2$  Hz, 1H), 7.13 - 7.05 (m, 5H), 7.02 (ddd,  $J=1.0, 6.8, 7.8$  Hz, 1H), 4.68 (d,  $J=9.8$  Hz, 1H), 4.44 (d,  $J=9.8$  Hz, 1H), 3.48 (d,  $J=13.7$  Hz, 1H), 3.23 (d,  $J=13.7$  Hz, 1H);  $^{13}\text{C}$  NMR: (125 MHz,  $\text{CDCl}_3$ )  $\delta$  146.16, 144.90, 137.67, 136.04, 129.38, 129.01, 128.58, 128.42, 127.12, 126.82, 125.35, 125.10, 124.96, 122.60, 122.33, 119.72, 119.07, 115.64, 111.23, 53.18, 49.29, 35.81 (the two  $\text{CF}_3$  groups not observed); MS (ESI-APCI) exact mass calculated for  $[\text{M}+\text{H}]$  ( $\text{C}_{31}\text{H}_{23}\text{F}_6\text{NS}$ ) requires  $m/z$  432.1, found  $m/z$  432.1.

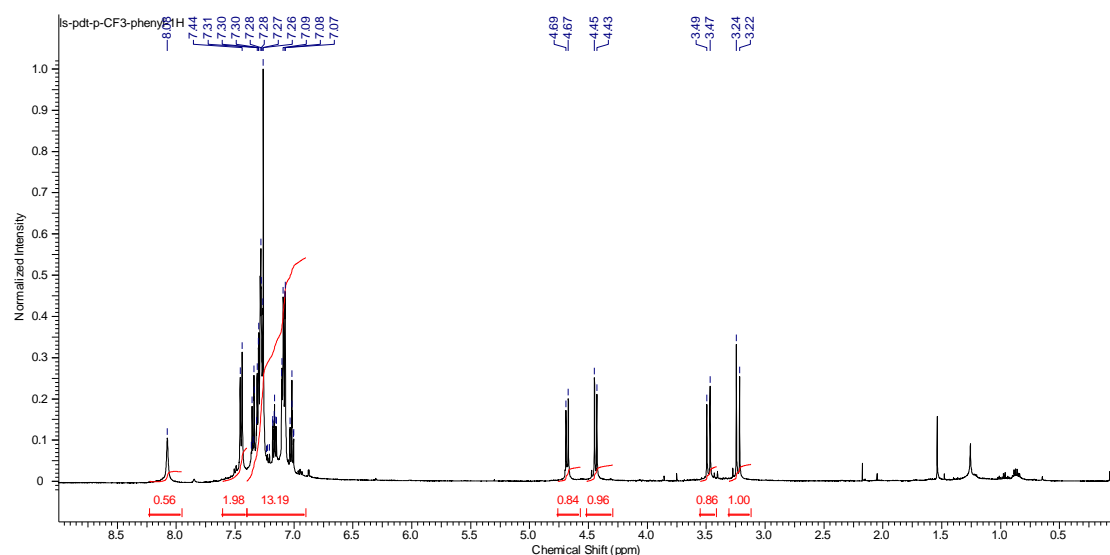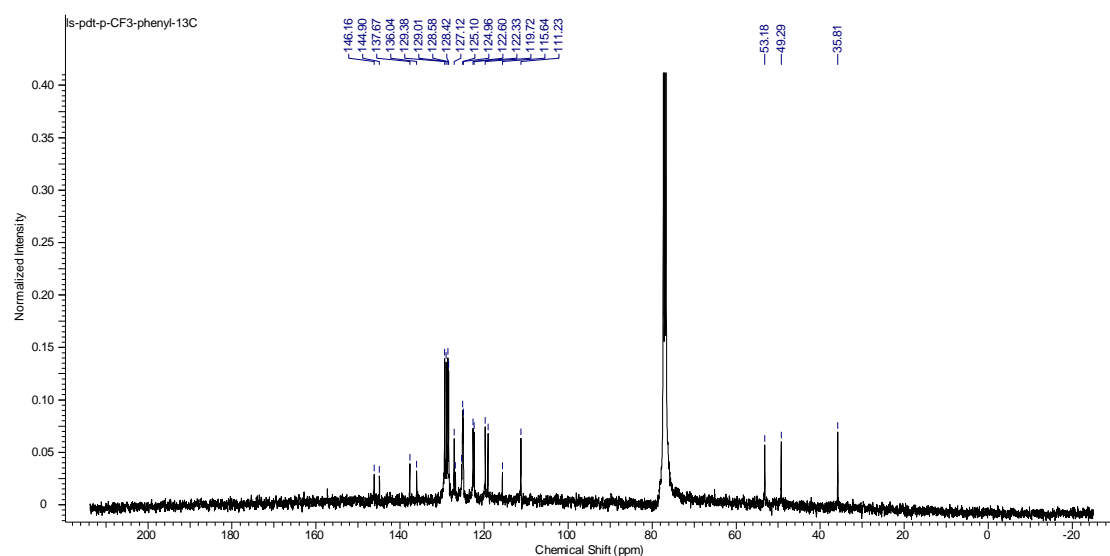

**Racemic sample:**

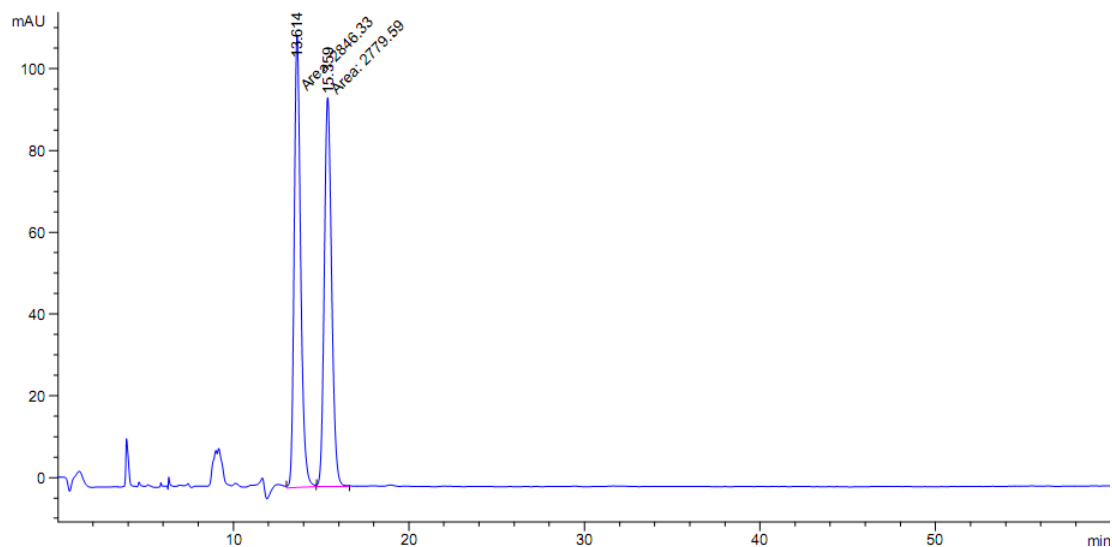

| Peak # | RetTime [min] | Type | Width [min] | Area [mAU*s] | Height [mAU] | Area %  |
|--------|---------------|------|-------------|--------------|--------------|---------|
| 1      | 13.614        | MM   | 0.4290      | 2846.32935   | 110.58447    | 50.5931 |
| 2      | 15.359        | MM   | 0.4869      | 2779.59399   | 95.13863     | 49.4069 |

**Enantioenriched sample:**

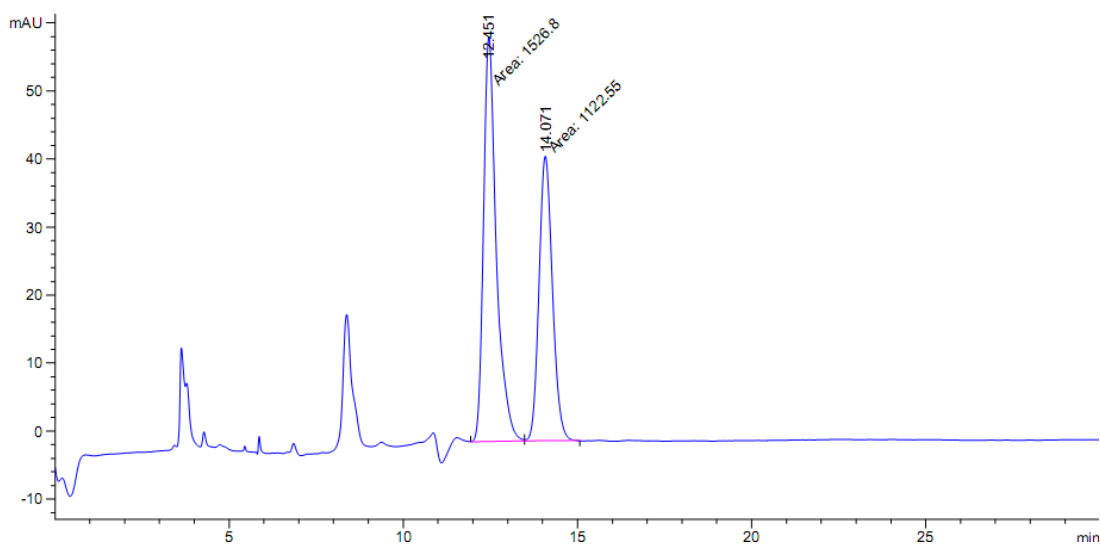

| Peak # | RetTime [min] | Type | Width [min] | Area [mAU*s] | Height [mAU] | Area %  |
|--------|---------------|------|-------------|--------------|--------------|---------|
| 1      | 12.451        | MM   | 0.4277      | 1526.80432   | 59.49850     | 57.6293 |
| 2      | 14.071        | MM   | 0.4471      | 1122.54895   | 41.84678     | 42.3707 |

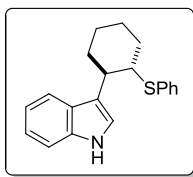

### 3-((1R,2S)-2-(benzylthio)cyclohexyl)-1H-indole (**2z**)

Followed method B from **1z** (17.6 mg, 0.05 mmol), for 26 h, and purified using silica gel chromatography to give 2.5 mg (16% yield) of **2z** as a white solid/gel.

This material was determined to be 9% ee by chiral HPLC analysis (ChiralPak AS-H, 10% *i*-PrOH, 1 mL/min, 220 nm,  $t_r$ (major) = 10 min,  $t_r$ (minor) = 11 min).

IR (Film): 3420 (br., s), 3056, 2928 (s), 2852, 1581, 1477, 1455, 1336, 1095, 910, 739 (s), 694  $\text{cm}^{-1}$ ;  $^1\text{H}$  NMR: (500 MHz,  $\text{CDCl}_3$ )  $\delta$  7.92 (br. s., 1H), 7.69 (d,  $J=7.8$  Hz, 1H), 7.34 (d,  $J=7.8$  Hz, 1H), 7.25 - 7.09 (m, 6H), 7.04 (d,  $J=2.4$  Hz, 2H), 3.50 (dt,  $J=3.4, 11.0$  Hz, 1H), 2.94 (dt,  $J=3.9, 11.2$  Hz, 1H), 2.38 - 2.16 (m, 1H), 2.16 - 2.02 (m, 1H), 1.92 - 1.68 (m, 3H), 1.60 - 1.36 (m, 3H);  $^{13}\text{C}$  NMR: (125 MHz,  $\text{CDCl}_3$ )  $\delta$  136.29, 135.17, 132.53, 128.38, 126.75, 126.43, 121.74, 121.14, 119.80, 119.37, 119.06, 111.25, 52.45, 41.30, 35.33, 34.66, 26.52, 26.27; MS (ESI-APCI) exact mass calculated for  $[\text{M}+\text{H}]$  ( $\text{C}_{20}\text{H}_{22}\text{NS}$ ) requires  $m/z$  308.2, found  $m/z$  308.1.

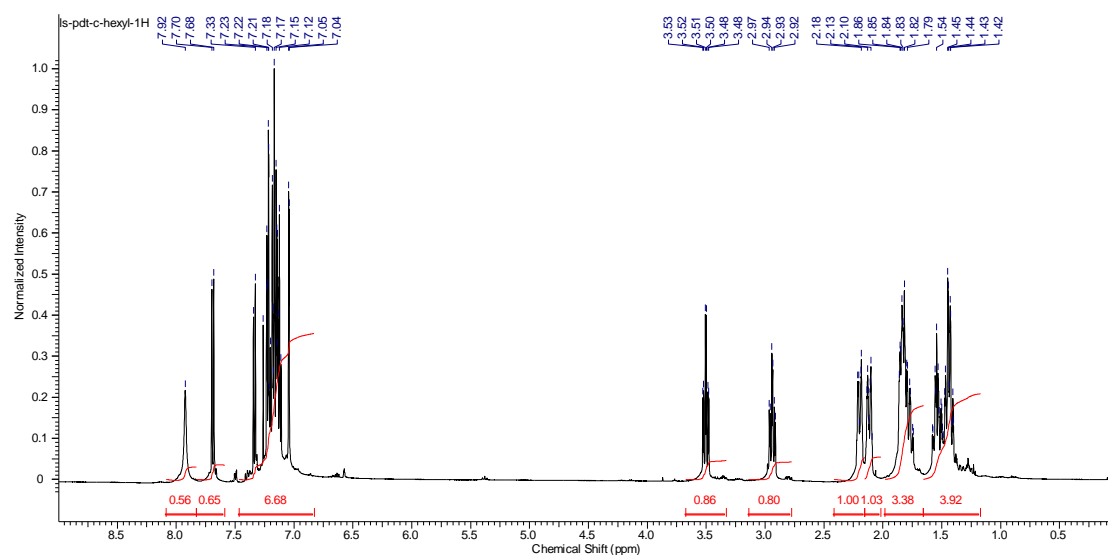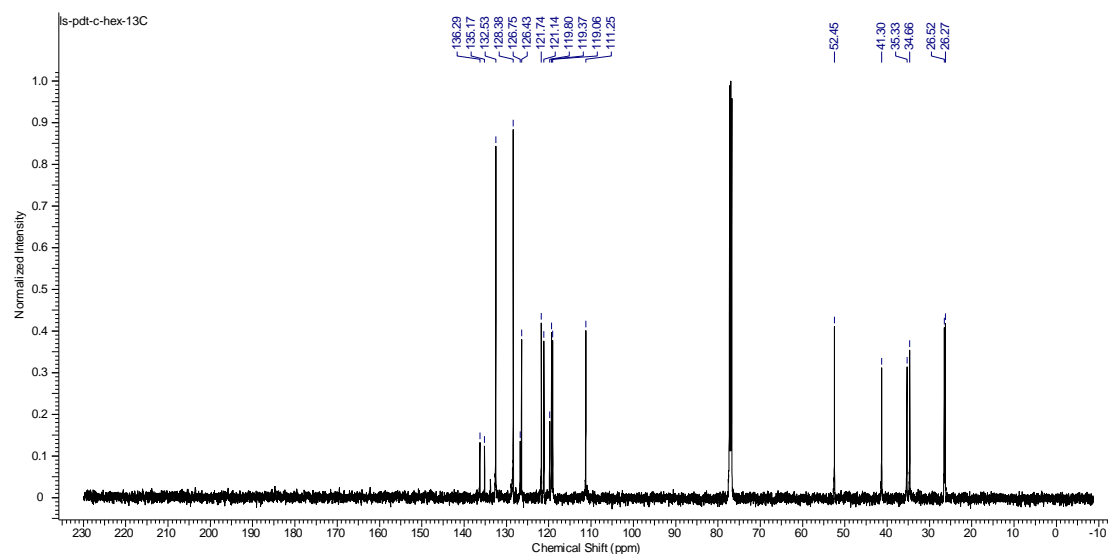

**Racemic sample:**

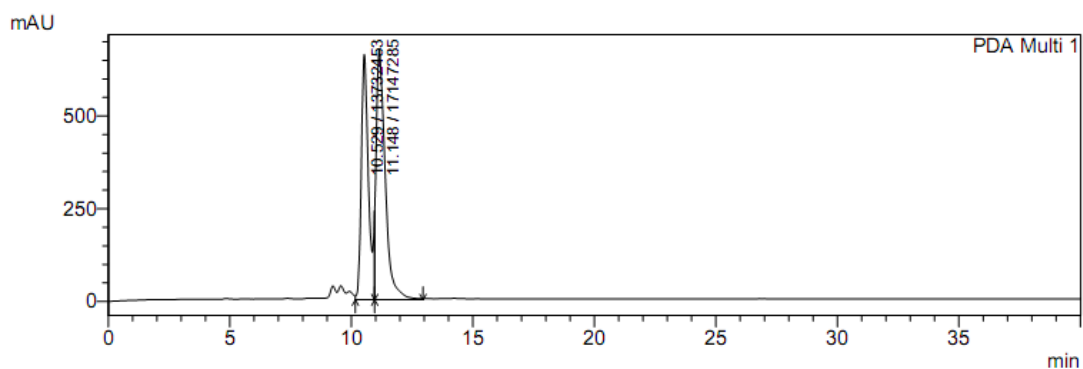

PDA Ch1 220nm 4nm

| Peak# | Ret. Time | Area     | Height  | Area %  | Height % |
|-------|-----------|----------|---------|---------|----------|
| 1     | 10.529    | 13732453 | 661285  | 44.471  | 49.449   |
| 2     | 11.148    | 17147285 | 676018  | 55.529  | 50.551   |
| Total |           | 30879738 | 1337303 | 100.000 | 100.000  |

**Enantioenriched sample:**

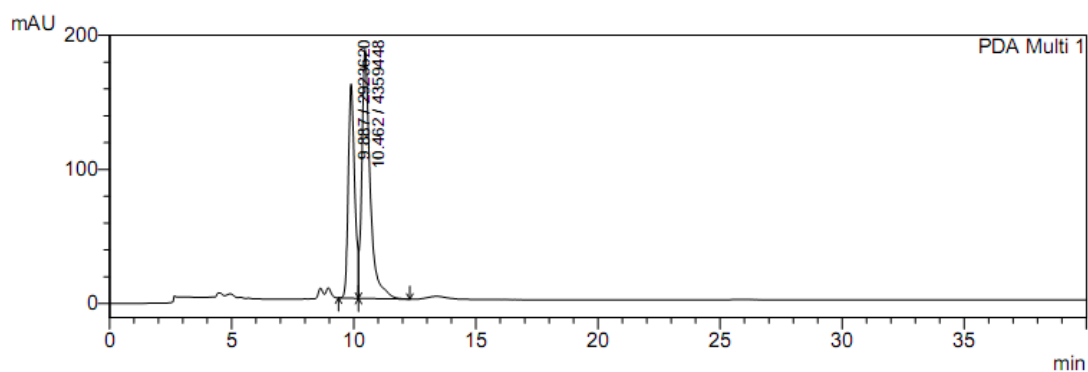

PDA Ch1 220nm 4nm

| Peak# | Ret. Time | Area    | Height | Area %  | Height % |
|-------|-----------|---------|--------|---------|----------|
| 1     | 9.887     | 2923620 | 159842 | 40.143  | 46.272   |
| 2     | 10.462    | 4359448 | 185595 | 59.857  | 53.728   |
| Total |           | 7283068 | 345436 | 100.000 | 100.000  |

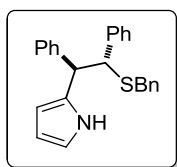

## 2-(benzylthio)-1,2-diphenylethyl-1H-pyrrole

Followed method B from **1a** (22.3 mg, 0.05 mmol), for 46 h, and purified using silica gel chromatography to give 13.6 mg (67% yield) of the desired product and bis-alkylation products (7.6:1 favoring the desired product) as a colorless gel. The desired product was determined to be 9% ee by chiral HPLC analysis (ChiralPak AD-H, 5% *i*-PrOH, 1 mL/min, 230 nm,  $t_r$ (major) = 19 min,  $t_r$ (minor) = 30 min). The products resulting from bis-alkylation of pyrrole were a mixture of diastereomers and were not separable by HPLC. IR (Film): 3428 (br.), 3027, 2914, 1600, 1492, 1452 (s), 1174, 1095, 1072, 1029, 911, 696 (s)  $\text{cm}^{-1}$ ;  $^1\text{H}$  NMR: (500 MHz,  $\text{CDCl}_3$ )  $\delta$  8.25 (br. s., 1H), 7.38 - 7.21 (m, 4H), 7.20 - 6.97 (m, 11H), 6.69 (dd,  $J=2.9$ , 4.4 Hz, 1H), 6.14 (dd,  $J=2.9$ , 5.9 Hz, 1H), 6.00 (dd,  $J=2.9$ , 4.4 Hz, 1H), 4.38 (d,  $J=9.3$  Hz, 1H), 4.24 (d,  $J=9.3$  Hz, 1H), 3.42 - 3.35 (m, 1H), 3.33 - 3.25 (m, 1H);  $^{13}\text{C}$  NMR: (125 MHz,  $\text{CDCl}_3$ )  $\delta$  141.33, 140.78, 137.91, 131.94, 129.06, 128.71, 128.34, 128.30, 128.03, 127.96, 126.93, 126.86, 126.36, 116.87, 108.16, 107.66, 54.24, 51.15, 36.04; MS (ESI-APCI) exact mass calculated for  $[\text{M}+\text{H}]$  ( $\text{C}_{25}\text{H}_{24}\text{NS}$ ) requires  $m/z$  370.2, found  $m/z$  370.2.

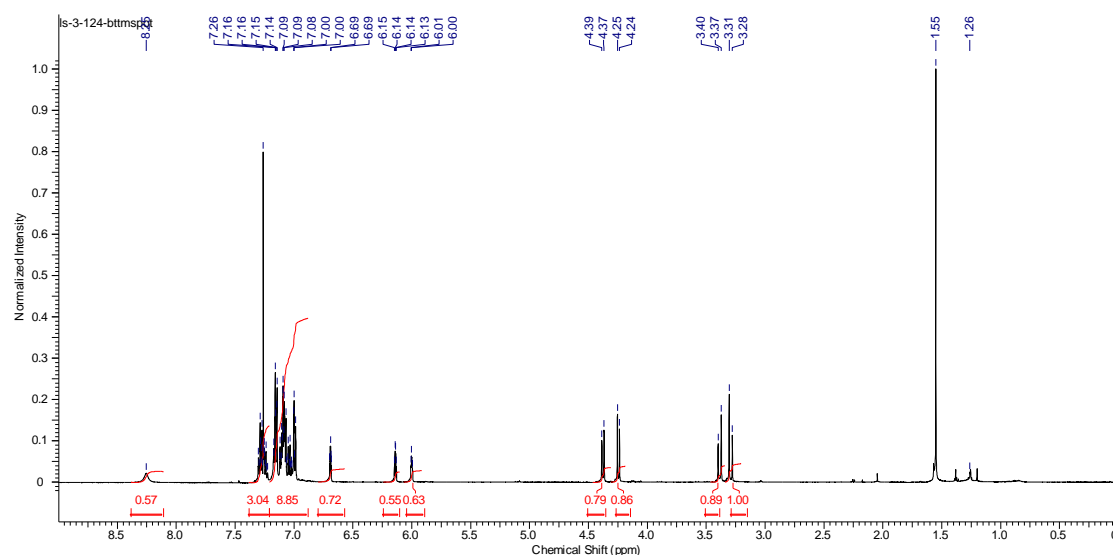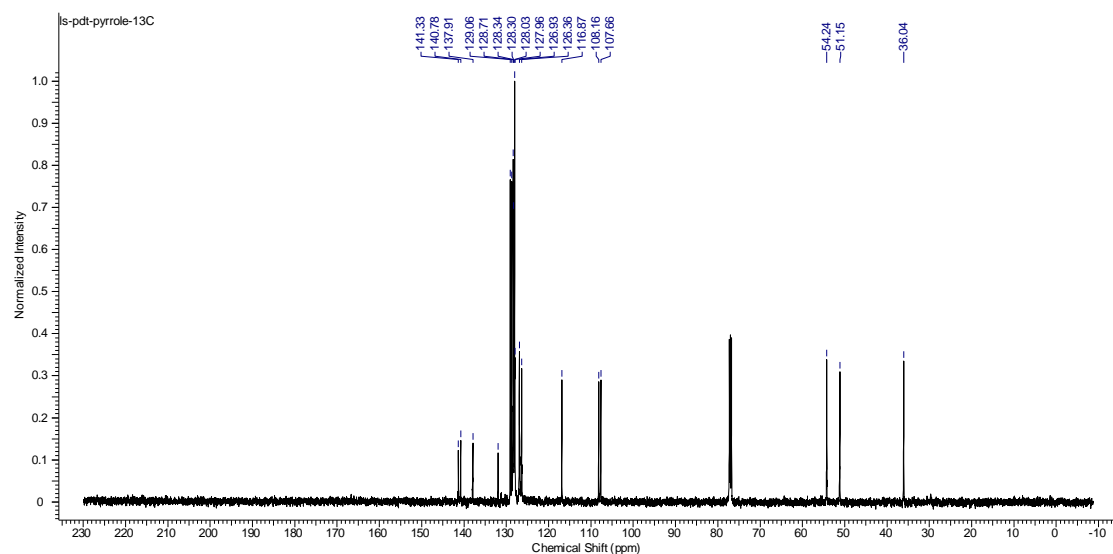

**Racemic sample:**

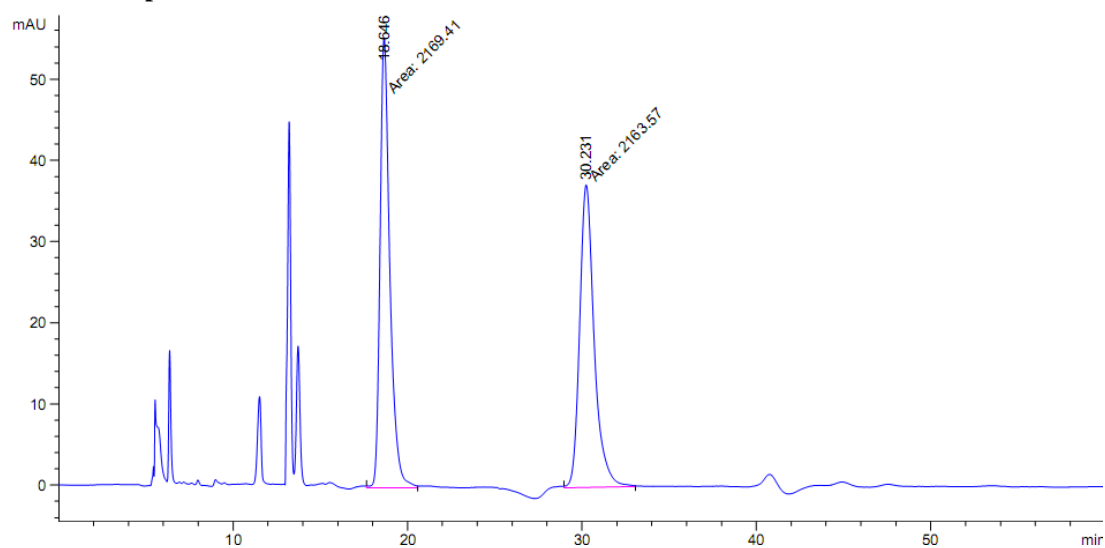

| Peak # | RetTime [min] | Type | Width [min] | Area [mAU*s] | Height [mAU] | Area %  |
|--------|---------------|------|-------------|--------------|--------------|---------|
| 1      | 18.646        | MM   | 0.6532      | 2169.41284   | 55.35432     | 50.0674 |
| 2      | 30.231        | MM   | 0.9679      | 2163.57202   | 37.25562     | 49.9326 |

**Enantioenriched sample:**

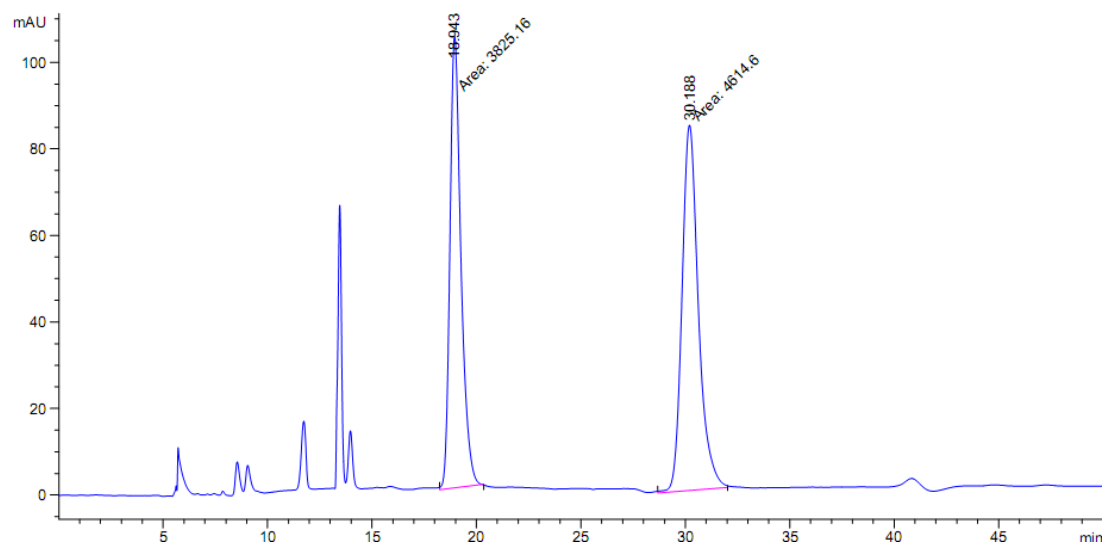

| Peak # | RetTime [min] | Type | Width [min] | Area [mAU*s] | Height [mAU] | Area %  |
|--------|---------------|------|-------------|--------------|--------------|---------|
| 1      | 18.943        | MM   | 0.6106      | 3825.15503   | 104.40643    | 45.3231 |
| 2      | 30.188        | MM   | 0.9103      | 4614.59961   | 84.48951     | 54.6769 |



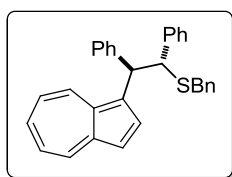

### 2-(azulen-1-yl)-1,2-diphenylethyl(benzyl)sulfane

Followed method B from **1a** (23.2 mg, 0.05 mmol), for 72 h, and purified using silica gel chromatography to give 4.3 mg (20% yield) of desired product as a blue gel. This material was determined to be 32% ee by chiral HPLC analysis (ChiralPak OD-H, 2% MeOH, 3 mL/min, 300 nm,  $t_r$ (major) = 12 min,  $t_r$ (minor) = 17 min). IR (Film): 3026, 2913, 1574 (s), 1492 (s), 1452 (s), 1394 (s), 1238, 1072, 1028, 943, 736, 695 (s)  $\text{cm}^{-1}$ ;  $^1\text{H}$  NMR: (500 MHz,  $\text{CDCl}_3$ )  $\delta$  8.39 (d,  $J=9.8$  Hz, 1H), 8.31 (d,  $J=9.3$  Hz, 1H), 8.01 (d,  $J=3.9$  Hz, 1H), 7.55 (t,  $J=9.8$  Hz, 1H), 7.47 (d,  $J=3.4$  Hz, 1H), 7.24 (m, 17H), 5.08 (d,  $J=11.2$  Hz, 1H), 4.65 (d,  $J=11.2$  Hz, 1H), 3.45 (d,  $J=13.7$  Hz, 1H), 3.32 (d,  $J=13.7$  Hz, 1H);  $^{13}\text{C}$  NMR: (125 MHz,  $\text{CDCl}_3$ )  $\delta$  143.15, 141.11, 140.94, 138.19, 137.28, 136.52, 136.06, 135.70, 133.17, 130.06, 129.08, 128.20, 128.13, 128.01, 127.85, 126.83, 126.78, 125.71, 122.67, 121.98, 117.08, 54.94, 50.29, 35.76; MS (ESI-APCI) exact mass calculated for  $[\text{M}+\text{H}]$  ( $\text{C}_{31}\text{H}_{27}\text{S}$ ) requires  $m/z$  431.2, found  $m/z$  431.1.

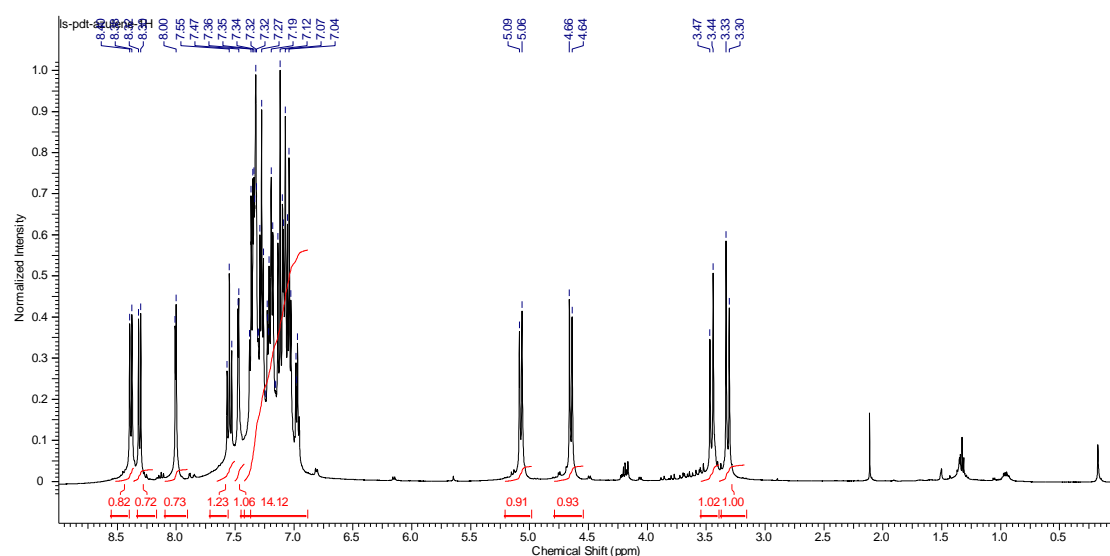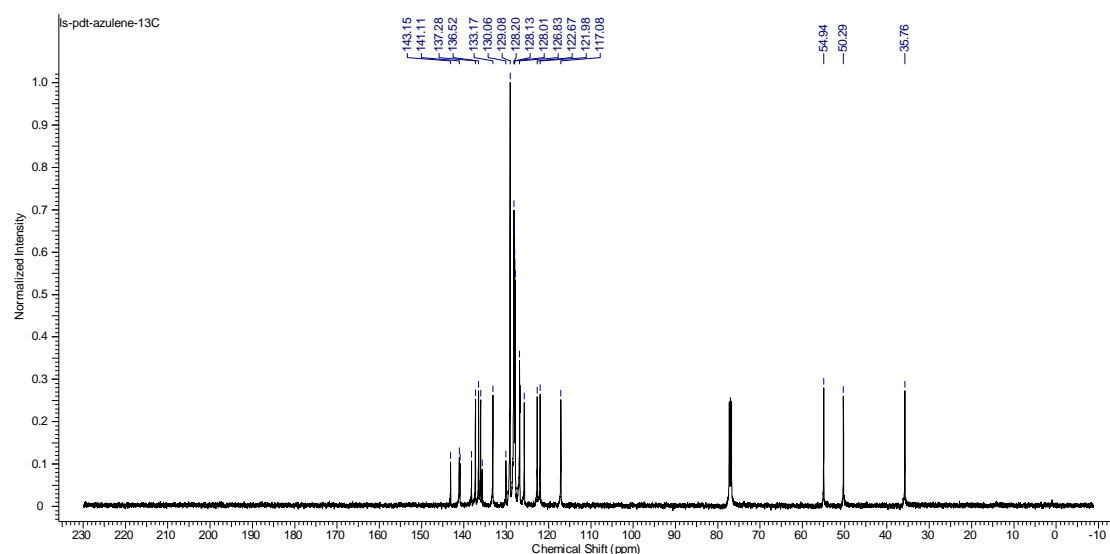

**Racemic sample:**

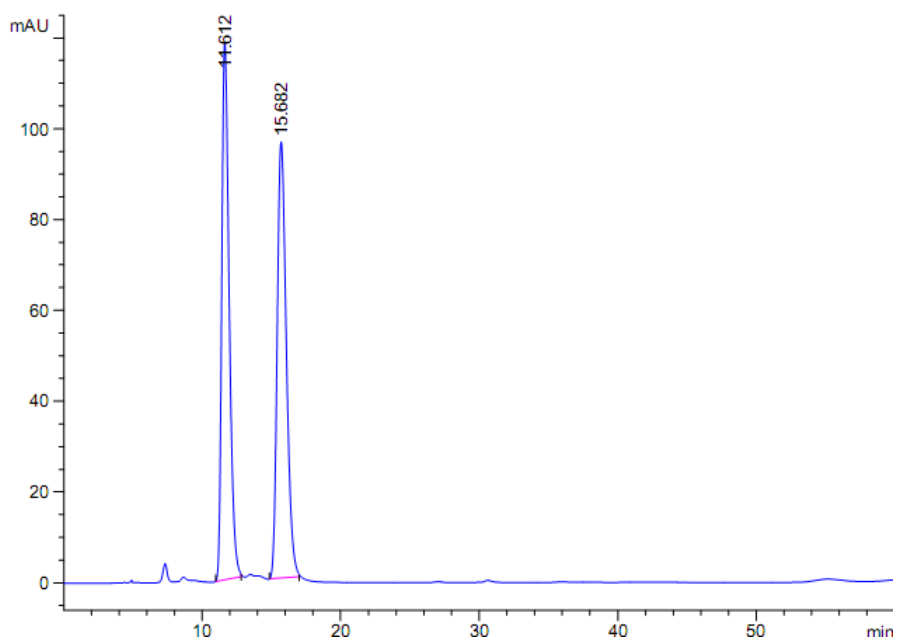

| Peak # | RetTime [min] | Type | Width [min] | Area [mAU*s] | Height [mAU] | Area %  |
|--------|---------------|------|-------------|--------------|--------------|---------|
| 1      | 11.612        | BB   | 0.5678      | 4380.72754   | 118.36784    | 49.9424 |
| 2      | 15.682        | BB   | 0.7091      | 4390.83887   | 96.09332     | 50.0576 |

**Enantioenriched sample:**

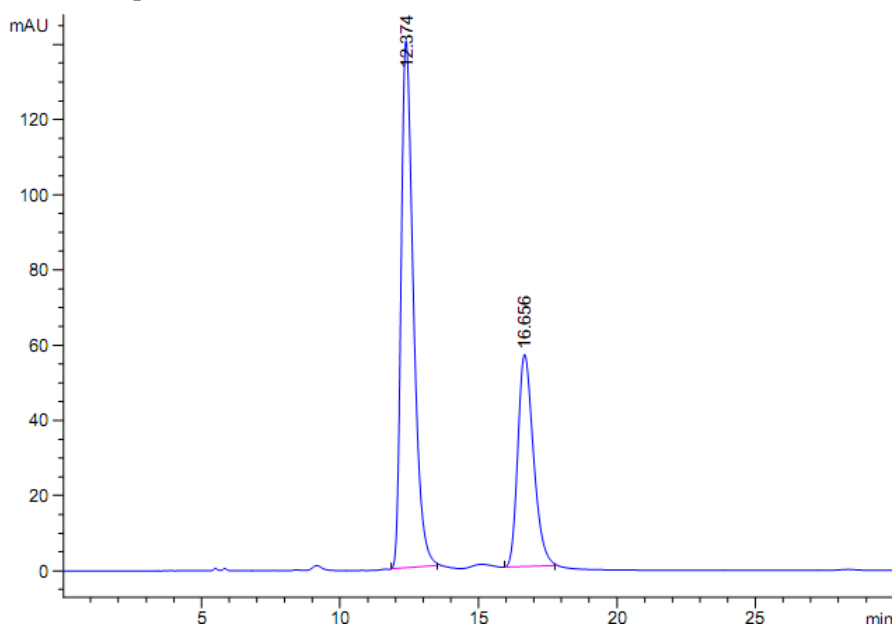

| Peak # | RetTime [min] | Type | Width [min] | Area [mAU*s] | Height [mAU] | Area %  |
|--------|---------------|------|-------------|--------------|--------------|---------|
| 1      | 12.374        | BB   | 0.4699      | 4323.57275   | 140.14844    | 66.1099 |
| 2      | 16.656        | BB   | 0.6022      | 2216.40625   | 56.43709     | 33.8901 |

**Nucleophiles that didn't produce desired products in the thiourea-catalyzed episulfonium ion opening reaction:**

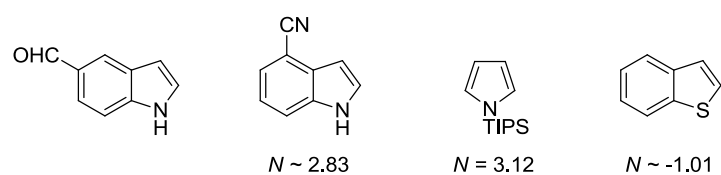

Nucleophilicity parameters were obtained from Mayr's database of reactivity parameter.

The  $N$  values of 4-cyanoindole and benzothiophene were estimated using data for 5-cyanoindole and thiophene, respectively.

**Episulfonium precursors that didn't produce high reactivity/selectivity:**

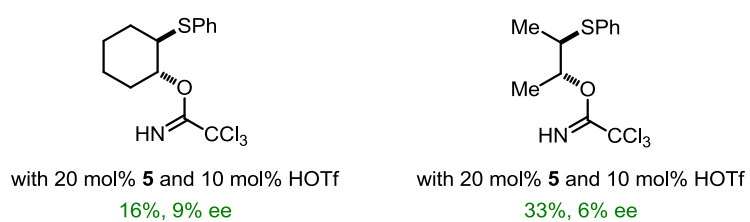

Supplement: NIHMS399652-supplement-7.pdf [file NIHMS399652-supplement-7.pdf]
